# Supplementary material for: Portrait of a Pathogen: The Mycobacterium tuberculosis Proteome In Vivo
Source: PLoS One. 2010 Nov 11;5(11):e13938. doi: 10.1371/journal.pone.0013938 (PMC2978697; doi:10.1371/journal.pone.0013938)
Supplement: Table S1 — Mtb proteins identified in 30-day infected guinea pig lungs. Data includes number of unique peptides identified for each protein. (0.10 MB XLS) [file pone.0013938.s001.xls]

## Sheet: unique_peptide_report of 30d
Table S1. Mtb Proteins Identified in 30-day Infected Guinea Pig Lungs
#	ORF	Protein Name	Protein Description [Protein Mass in Da]	Accession Number	Number of Unique Peptides Identified at 30 Days
1	Rv0015c	PknA	TRANSMEMBRANE SERINE/THREONINE-PROTEIN KINASE A PKNA (PROTEIN KINASE A) (STPK A) [Mycobacterium tuberculosis H37Rv] [MASS=45597]	gi|15607157|ref|NP_214529.1|	2
2	Rv0026	Rv0026	hypothetical protein Rv0026 [Mycobacterium tuberculosis H37Rv] [MASS=46475]	gi|15607168|ref|NP_214540.1|	3
3	Rv0032	BioF2	POSSIBLE 8-AMINO-7-OXONONANOATE SYNTHASE BIOF2 (AONS) (8-AMINO-7-KETOPELARGONATE SYNTHASE) (7-KETO-8-AMINO-PELARGONIC ACID SYNTHETASE) (7-KAP SYNTHETASE) (L-ALANINE--PIMELYL CoA LIGASE) [Mycobacterium tuberculosis H37Rv] [MASS=86243]	gi|15607174|ref|NP_214546.1|	4
4	Rv0039c	Rv0039c	POSSIBLE CONSERVED TRANSMEMBRANE PROTEIN [Mycobacterium tuberculosis H37Rv] [MASS=11292]	gi|15607181|ref|NP_214553.1|	3
5	Rv0060	Rv0060	hypothetical protein Rv0060 [Mycobacterium tuberculosis H37Rv] [MASS=38563]	gi|15607202|ref|NP_214574.1|	2
6	Rv0101	Nrp	PROBABLE PEPTIDE SYNTHETASE NRP (PEPTIDE SYNTHASE) [Mycobacterium tuberculosis H37Rv] [MASS=269407]	gi|15607243|ref|NP_214615.1|	8
7	Rv0102	Rv0102	PROBABLE CONSERVED INTEGRAL MEMBRANE PROTEIN [Mycobacterium tuberculosis H37Rv] [MASS=70356]	gi|15607244|ref|NP_214616.1|	3
8	Rv0141c	Rv0141c	hypothetical protein Rv0141c [Mycobacterium tuberculosis H37Rv] [MASS=15490]	gi|15607283|ref|NP_214655.1|	2
9	Rv0145	Rv0145	hypothetical protein Rv0145 [Mycobacterium tuberculosis H37Rv] [MASS=34381]	gi|15607287|ref|NP_214659.1|	3
10	Rv0172	Mce1D	MCE-FAMILY PROTEIN MCE1D [Mycobacterium tuberculosis H37Rv] [MASS=56516]	gi|15607313|ref|NP_214686.1|	3
11	Rv0176	Rv0176	PROBABLE CONSERVED MCE ASSOCIATED TRANSMEMBRANE PROTEIN [Mycobacterium tuberculosis H37Rv] [MASS=35437]	gi|15607317|ref|NP_214690.1|	2
12	Rv0189c	IlvD	dihydroxy-acid dehydratase [Mycobacterium tuberculosis H37Rv] [MASS=59351]	gi|15607330|ref|NP_214703.1|	4
13	Rv0196	Rv0196	POSSIBLE TRANSCRIPTIONAL REGULATORY PROTEIN [Mycobacterium tuberculosis H37Rv] [MASS=21241]	gi|15607337|ref|NP_214710.1|	3
14	Rv0197	Rv0197	POSSIBLE OXIDOREDUCTASE [Mycobacterium tuberculosis H37Rv] [MASS=82571]	gi|15607338|ref|NP_214711.1|	2
15	Rv0214	FadD4	acyl-CoA synthetase [Mycobacterium tuberculosis H37Rv] [MASS=58889]	gi|15607355|ref|NP_214728.1|	3
16	Rv0222	EchA1	enoyl-CoA hydratase [Mycobacterium tuberculosis H37Rv] [MASS=27280]	gi|15607363|ref|NP_214736.1|	3
17	Rv0235c	Rv0235c	PROBABLE CONSERVED TRANSMEMBRANE PROTEIN [Mycobacterium tuberculosis H37Rv] [MASS=54837]	gi|15607376|ref|NP_214749.1|	2
18	Rv0252	NirB	PROBABLE NITRITE REDUCTASE [NAD(P)H] LARGE SUBUNIT [FAD FLAVOPROTEIN] NIRB [Mycobacterium tuberculosis H37Rv] [MASS=90352]	gi|15607393|ref|NP_214766.1|	3
19	Rv0267	NarU	PROBABLE INTEGRAL MEMBRANE NITRITE EXTRUSION PROTEIN NARU (NITRITE FACILITATOR) [Mycobacterium tuberculosis H37Rv] [MASS=49133]	gi|15607408|ref|NP_214781.1|	4
20	Rv0301	Rv0301	hypothetical protein Rv0301 [Mycobacterium tuberculosis H37Rv] [MASS=15746]	gi|15607442|ref|NP_214815.1|	2
21	Rv0329c	Rv0329c	hypothetical protein Rv0329c [Mycobacterium tuberculosis H37Rv] [MASS=21993]	gi|15607470|ref|NP_214843.1|	3
22	Rv0338c	Rv0338c	PROBABLE IRON-SULFUR-BINDING REDUCTASE [Mycobacterium tuberculosis H37Rv] [MASS=95485]	gi|15607479|ref|NP_214852.1|	4
23	Rv0342	IniA	ISONIAZID INDUCTIBLE GENE PROTEIN INIA [Mycobacterium tuberculosis H37Rv] [MASS=70082]	gi|15607483|ref|NP_214856.1|	2
24	Rv0343	IniC	ISONIAZID INDUCTIBLE GENE PROTEIN INIC [Mycobacterium tuberculosis H37Rv] [MASS=53019]	gi|15607484|ref|NP_214857.1|	4
25	Rv0398c	Rv0398c	POSSIBLE SECRETED PROTEIN [Mycobacterium tuberculosis H37Rv] [MASS=21655]	gi|15607539|ref|NP_214912.1|	4
26	Rv0405	Pks6	PROBABLE MEMBRANE BOUND POLYKETIDE SYNTHASE PKS6 [Mycobacterium tuberculosis H37Rv] [MASS=147612]	gi|15607546|ref|NP_214919.1|	6
27	Rv0421c	Rv0421c	hypothetical protein Rv0421c [Mycobacterium tuberculosis H37Rv] [MASS=21738]	gi|15607562|ref|NP_214935.1|	2
28	Rv0423c	ThiC	thiamine biosynthesis protein ThiC [Mycobacterium tuberculosis H37Rv] [MASS=59897]	gi|15607564|ref|NP_214937.1|	4
29	Rv0425c	CtpH	POSSIBLE METAL CATION TRANSPORTING P-TYPE ATPASE CTPH [Mycobacterium tuberculosis H37Rv] [MASS=159772]	gi|15607566|ref|NP_214939.1|	4
30	Rv0450c	MmpL4	PROBABLE CONSERVED TRANSMEMBRANE TRANSPORT PROTEIN MMPL4 [Mycobacterium tuberculosis H37Rv] [MASS=105234]	gi|15607591|ref|NP_214964.1|	2
31	Rv0462	Lpd	dihydrolipoamide dehydrogenase [Mycobacterium tuberculosis H37Rv] [MASS=49239]	gi|15607603|ref|NP_214976.1|	2
32	Rv0490	SenX3	PUTATIVE TWO COMPONENT SENSOR HISTIDINE KINASE SENX3 [Mycobacterium tuberculosis H37Rv] [MASS=44824]	gi|15607631|ref|NP_215004.1|	2
33	Rv0496	Rv0496	hypothetical protein Rv0496 [Mycobacterium tuberculosis H37Rv] [MASS=34875]	gi|15607637|ref|NP_215010.1|	2
34	Rv0535	Pnp	5'-methylthioadenosine phosphorylase [Mycobacterium tuberculosis H37Rv] [MASS=27964]	gi|15607675|ref|NP_215049.1|	3
35	Rv0547c	Rv0547c	short chain dehydrogenase [Mycobacterium tuberculosis H37Rv] [MASS=31867]	gi|15607687|ref|NP_215061.1|	3
36	Rv0570	NrdZ	PROBABLE RIBONUCLEOSIDE-DIPHOSPHATE REDUCTASE (LARGE SUBUNIT) NRDZ (RIBONUCLEOTIDE REDUCTASE) [Mycobacterium tuberculosis H37Rv] [MASS=74521]	gi|15607710|ref|NP_215084.1|	2
37	Rv0579	Rv0579	hypothetical protein Rv0579 [Mycobacterium tuberculosis H37Rv] [MASS=28540]	gi|15607719|ref|NP_215093.1|	2
38	Rv0667	RpoB	DNA-directed RNA polymerase subunit beta [Mycobacterium tuberculosis H37Rv] [MASS=129235]	gi|15607807|ref|NP_215181.1|	4
39	Rv0672	FadE8	PROBABLE ACYL-CoA DEHYDROGENASE FADE8 [Mycobacterium tuberculosis H37Rv] [MASS=58534]	gi|15607812|ref|NP_215186.1|	6
40	Rv0697	Rv0697	PROBABLE DEHYDROGENASE [Mycobacterium tuberculosis H37Rv] [MASS=50291]	gi|15607837|ref|NP_215211.1|	3
41	Rv0698	Rv0698	hypothetical protein Rv0698 [Mycobacterium tuberculosis H37Rv] [MASS=22325]	gi|15607838|ref|NP_215212.1|	2
42	Rv0711	AtsA	POSSIBLE ARYLSULFATASE ATSA (ARYL-SULFATE SULPHOHYDROLASE) (ARYLSULPHATASE) [Mycobacterium tuberculosis H37Rv] [MASS=86214]	gi|15607851|ref|NP_215225.1|	4
43	Rv0725c	Rv0725c	hypothetical protein Rv0725c [Mycobacterium tuberculosis H37Rv] [MASS=32247]	gi|15607865|ref|NP_215239.1|	3
44	Rv0823c	Rv0823c	POSSIBLE TRANSCRIPTIONAL REGULATORY PROTEIN [Mycobacterium tuberculosis H37Rv] [MASS=41388]	gi|15607963|ref|NP_215338.1|	3
45	Rv0846c	Rv0846c	PROBABLE OXIDASE [Mycobacterium tuberculosis H37Rv] [MASS=53796]	gi|15607986|ref|NP_215361.1|	4
46	Rv0860	FadB	PROBABLE FATTY OXIDATION PROTEIN FADB [Mycobacterium tuberculosis H37Rv] [MASS=76104]	gi|15608000|ref|NP_215375.1|	7
47	Rv0863	Rv0863	hypothetical protein Rv0863 [Mycobacterium tuberculosis H37Rv] [MASS=10111]	gi|15608003|ref|NP_215378.1|	2
48	Rv0869c	MoaA2	molybdenum cofactor biosynthesis protein A [Mycobacterium tuberculosis H37Rv] [MASS=38985]	gi|15608009|ref|NP_215384.1|	2
49	Rv0897c	Rv0897c	PROBABLE OXIDOREDUCTASE [Mycobacterium tuberculosis H37Rv] [MASS=56234]	gi|15608037|ref|NP_215412.1|	3
50	Rv0905	EchA6	enoyl-CoA hydratase [Mycobacterium tuberculosis H37Rv] [MASS=26029]	gi|15608045|ref|NP_215420.1|	4
51	Rv0908	CtpE	PROBABLE METAL CATION TRANSPORTER ATPASE P-TYPE CTPE [Mycobacterium tuberculosis H37Rv] [MASS=84973]	gi|15608048|ref|NP_215423.1|	3
52	Rv0917	BetP	POSSIBLE GLYCINE BETAINE TRANSPORT INTEGRAL MEMBRANE PROTEIN BETP [Mycobacterium tuberculosis H37Rv] [MASS=63868]	gi|15608057|ref|NP_215432.1|	3
53	Rv0922	Rv0922	POSSIBLE TRANSPOSASE [Mycobacterium tuberculosis H37Rv] [MASS=59629]	gi|15608062|ref|NP_215437.1|	3
54	Rv0940c	Rv0940c	POSSIBLE OXIDOREDUCTASE [Mycobacterium tuberculosis H37Rv] [MASS=31788]	gi|15608080|ref|NP_215455.1|	3
55	Rv0955	Rv0955	PROBABLE CONSERVED INTEGRAL MEMBRANE PROTEIN [Mycobacterium tuberculosis H37Rv] [MASS=46088]	gi|15608095|ref|NP_215470.1|	3
56	Rv0969	CtpV	PROBABLE METAL CATION TRANSPORTER P-TYPE ATPASE CTPV [Mycobacterium tuberculosis H37Rv] [MASS=80102]	gi|15608109|ref|NP_215484.1|	3
57	Rv0971c	EchA7	enoyl-CoA hydratase [Mycobacterium tuberculosis H37Rv] [MASS=27604]	gi|15608111|ref|NP_215486.1|	3
58	Rv0993	GalU	PROBABLE UTP--GLUCOSE-1-PHOSPHATE URIDYLYLTRANSFERASE GALU (UDP-GLUCOSE PYROPHOSPHORYLASE) (UDPGP) (ALPHA-D-GLUCOSYL-1-PHOSPHATE URIDYLYLTRANSFERASE) (URIDINE DIPHOSPHOGLUCOSE PYROPHOSPHORYLASE) [Mycobacterium tuberculosis H37Rv] [MASS=32378]	gi|15608133|ref|NP_215508.1|	2
59	Rv1009	RpfB	Probable resuscitation-promoting factor rpfB [Mycobacterium tuberculosis H37Rv] [MASS=38078]	gi|15608149|ref|NP_215525.1|	4
60	Rv1018c	GlmU	Probable UDP-N-acetylglucosamine pyrophosphorylase glmU [Mycobacterium tuberculosis H37Rv] [MASS=51584]	gi|15608158|ref|NP_215534.1|	2
61	Rv1020	Mfd	PROBABLE TRANSCRIPTION-REPAIR COUPLING FACTOR MFD (TRCF) [Mycobacterium tuberculosis H37Rv] [MASS=132907]	gi|15608160|ref|NP_215536.1|	5
62	Rv1023	Eno	phosphopyruvate hydratase [Mycobacterium tuberculosis H37Rv] [MASS=44961]	gi|15608163|ref|NP_215539.1|	4
63	Rv1045	Rv1045	hypothetical protein Rv1045 [Mycobacterium tuberculosis H37Rv] [MASS=31990]	gi|15608185|ref|NP_215561.1|	3
64	Rv1128c	Rv1128c	hypothetical protein Rv1128c [Mycobacterium tuberculosis H37Rv] [MASS=49274]	gi|15608268|ref|NP_215644.1|	2
65	Rv1159	Rv1159	mannosyltransferase [Mycobacterium tuberculosis H37Rv] [MASS=47102]	gi|15608299|ref|NP_215675.1|	2
66	Rv1161	NarG	PROBABLE RESPIRATORY NITRATE REDUCTASE (ALPHA CHAIN) NARG [Mycobacterium tuberculosis H37Rv] [MASS=136955]	gi|15608301|ref|NP_215677.1|	3
67	Rv1162	NarH	PROBABLE RESPIRATORY NITRATE REDUCTASE (BETA CHAIN) NARH [Mycobacterium tuberculosis H37Rv] [MASS=62037]	gi|15608302|ref|NP_215678.1|	4
68	Rv1181	Pks4	PROBABLE POLYKETIDE BETA-KETOACYL SYNTHASE PKS4 [Mycobacterium tuberculosis H37Rv] [MASS=168115]	gi|15608321|ref|NP_215697.1|	4
69	Rv1183	MmpL10	PROBABLE CONSERVED TRANSMEMBRANE TRANSPORT PROTEIN MMPL10 [Mycobacterium tuberculosis H37Rv] [MASS=106414]	gi|15608323|ref|NP_215699.1|	5
70	Rv1192	Rv1192	hypothetical protein Rv1192 [Mycobacterium tuberculosis H37Rv] [MASS=30213]	gi|15608332|ref|NP_215708.1|	2
71	Rv1264	Rv1264	ADENYLYL CYCLASE (ATP PYROPHOSPHATE-LYASE) (ADENYLATE CYCLASE) [Mycobacterium tuberculosis H37Rv] [MASS=42232]	gi|15608404|ref|NP_215780.1|	3
72	Rv1267c	EmbR	PROBABLE TRANSCRIPTIONAL REGULATORY PROTEIN EMBR [Mycobacterium tuberculosis H37Rv] [MASS=41933]	gi|15608407|ref|NP_215783.1|	3
73	Rv1270c	LprA	POSSIBLE LIPOPROTEIN LPRA [Mycobacterium tuberculosis H37Rv] [MASS=24874]	gi|15608410|ref|NP_215786.1|	2
74	Rv1275	LprC	POSSIBLE LIPOPROTEIN LPRC [Mycobacterium tuberculosis H37Rv] [MASS=18871]	gi|15608415|ref|NP_215791.1|	2
75	Rv1281c	OppD	PROBABLE OLIGOPEPTIDE-TRANSPORT ATP-BINDING PROTEIN ABC TRANSPORTER OPPD [Mycobacterium tuberculosis H37Rv] [MASS=65293]	gi|15608421|ref|NP_215797.1|	2
76	Rv1338	MurI	glutamate racemase [Mycobacterium tuberculosis H37Rv] [MASS=28643]	gi|15608478|ref|NP_215854.1|	2
77	Rv1346	FadE14	POSSIBLE ACYL-CoA DEHYDROGENASE FADE14 [Mycobacterium tuberculosis H37Rv] [MASS=41180]	gi|15608486|ref|NP_215862.1|	2
78	Rv1349	Rv1349	PROBABLE DRUGS-TRANSPORT TRANSMEMBRANE ATP-BINDING PROTEIN ABC TRANSPORTER [Mycobacterium tuberculosis H37Rv] [MASS=60954]	gi|15608489|ref|NP_215865.1|	3
79	Rv1354c	Rv1354c	hypothetical protein Rv1354c [Mycobacterium tuberculosis H37Rv] [MASS=67653]	gi|15608494|ref|NP_215870.1|	3
80	Rv1360	Rv1360	PROBABLE OXIDOREDUCTASE [Mycobacterium tuberculosis H37Rv] [MASS=37252]	gi|15608500|ref|NP_215876.1|	4
81	Rv1459c	Rv1459c	POSSIBLE CONSERVED INTEGRAL MEMBRANE PROTEIN [Mycobacterium tuberculosis H37Rv] [MASS=62693]	gi|15608597|ref|NP_215975.1|	2
82	Rv1469	CtpD	PROBABLE CATION TRANSPORTER P-TYPE ATPASE D CTPD [Mycobacterium tuberculosis H37Rv] [MASS=67884]	gi|15608607|ref|NP_215985.1|	3
83	Rv1475c	Acn	aconitate hydratase [Mycobacterium tuberculosis H37Rv] [MASS=102448]	gi|15608613|ref|NP_215991.1|	4
84	Rv1484	InhA	enoyl-(acyl carrier protein) reductase [Mycobacterium tuberculosis H37Rv] [MASS=28528]	gi|15608622|ref|NP_216000.1|	2
85	Rv1490	Rv1490	PROBABLE MEMBRANE PROTEIN [Mycobacterium tuberculosis H37Rv] [MASS=48150]	gi|15608628|ref|NP_216006.1|	2
86	Rv1508c	Rv1508c	Probable membrane protein [Mycobacterium tuberculosis H37Rv] [MASS=63889]	gi|15608646|ref|NP_216024.1|	4
87	Rv1510	Rv1510	conserved probable membrane protein [Mycobacterium tuberculosis H37Rv] [MASS=44293]	gi|15608648|ref|NP_216026.1|	3
88	Rv1518	Rv1518	hypothetical protein Rv1518 [Mycobacterium tuberculosis H37Rv] [MASS=36089]	gi|15608656|ref|NP_216034.1|	2
89	Rv1522c	MmpL12	PROBABLE CONSERVED TRANSMEMBRANE TRANSPORT PROTEIN MMPL12 [Mycobacterium tuberculosis H37Rv] [MASS=122429]	gi|15608660|ref|NP_216038.1|	3
90	Rv1527c	Pks5	Probable polyketide synthase pks5 [Mycobacterium tuberculosis H37Rv] [MASS=223887]	gi|15608665|ref|NP_216043.1|	10
91	Rv1528c	PapA4	PROBABLE CONSERVED POLYKETIDE SYNTHASE ASSOCIATED PROTEIN PAPA4 [Mycobacterium tuberculosis H37Rv] [MASS=18076]	gi|15608666|ref|NP_216044.1|	3
92	Rv1547	DnaE1	DNA polymerase III subunit alpha [Mycobacterium tuberculosis H37Rv] [MASS=129322]	gi|15608685|ref|NP_216063.1|	7
93	Rv1557	MmpL6	PROBABLE CONSERVED TRANSMEMBRANE TRANSPORT PROTEIN MMPL6 [Mycobacterium tuberculosis H37Rv] [MASS=42421]	gi|15608695|ref|NP_216073.1|	5
94	Rv1568	BioA	adenosylmethionine--8-amino-7-oxononanoate transaminase [Mycobacterium tuberculosis H37Rv] [MASS=46319]	gi|15608706|ref|NP_216084.1|	6
95	Rv1582c	Rv1582c	Probable phiRv1 phage protein [Mycobacterium tuberculosis H37Rv] [MASS=52401]	gi|15608720|ref|NP_216098.1|	2
96	Rv1610	Rv1610	POSSIBLE CONSERVED MEMBRANE PROTEIN [Mycobacterium tuberculosis H37Rv] [MASS=24618]	gi|15608748|ref|NP_216126.1|	2
97	Rv1661	Pks7	Probable polyketide synthase pks7 [Mycobacterium tuberculosis H37Rv] [MASS=221045]	gi|15608799|ref|NP_216177.1|	8
98	Rv1662	Pks8	Probable polyketide synthase pks8 [Mycobacterium tuberculosis H37Rv] [MASS=167095]	gi|15608800|ref|NP_216178.1|	8
99	Rv1664	Pks9	Probable polyketide synthase pks9 [Mycobacterium tuberculosis H37Rv] [MASS=106402]	gi|15608802|ref|NP_216180.1|	6
100	Rv1700	Rv1700	hypothetical protein Rv1700 [Mycobacterium tuberculosis H37Rv] [MASS=22893]	gi|15608838|ref|NP_216216.1|	2
101	Rv1707	Rv1707	PROBABLE CONSERVED TRANSMEMBRANE PROTEIN [Mycobacterium tuberculosis H37Rv] [MASS=51203]	gi|15608845|ref|NP_216223.1|	3
102	Rv1737c	NarK2	POSSIBLE NITRATE/NITRITE TRANSPORTER NARK2 [Mycobacterium tuberculosis H37Rv] [MASS=41109]	gi|15608875|ref|NP_216253.1|	3
103	Rv1747	Rv1747	PROBABLE CONSERVED TRANSMEMBRANE ATP-BINDING PROTEIN ABC TRANSPORTER [Mycobacterium tuberculosis H37Rv] [MASS=92153]	gi|15608885|ref|NP_216263.1|	6
104	Rv1796	MycP5	PROBABLE PROLINE RICH MEMBRANE-ANCHORED MYCOSIN MYCP5 (SERINE PROTEASE) (SUBTILISIN-LIKE PROTEASE) (SUBTILASE-LIKE) (MYCOSIN-5) [Mycobacterium tuberculosis H37Rv] [MASS=60027]	gi|15608933|ref|NP_216312.1|	4
105	Rv1797	Rv1797	hypothetical protein Rv1797 [Mycobacterium tuberculosis H37Rv] [MASS=44178]	gi|15608934|ref|NP_216313.1|	6
106	Rv1820	IlvG	hypothetical protein Rv1820 [Mycobacterium tuberculosis H37Rv] [MASS=57520]	gi|15608957|ref|NP_216336.1|	5
107	Rv1837c	GlcB	malate synthase G [Mycobacterium tuberculosis H37Rv] [MASS=80402]	gi|15608974|ref|NP_216353.1|	5
108	Rv1854c	Ndh	PROBABLE NADH DEHYDROGENASE NDH [Mycobacterium tuberculosis H37Rv] [MASS=49619]	gi|15608991|ref|NP_216370.1|	3
109	Rv1857	ModA	PROBABLE MOLYBDATE-BINDING LIPOPROTEIN MODA [Mycobacterium tuberculosis H37Rv] [MASS=26576]	gi|15608994|ref|NP_216373.1|	3
110	Rv1817c	Rv1817c	hypothetical protein Rv1871c [Mycobacterium tuberculosis H37Rv] [MASS=14681]	gi|15609008|ref|NP_216387.1|	2
111	Rv1877	Rv1877	PROBABLE CONSERVED INTEGRAL MEMBRANE PROTEIN [Mycobacterium tuberculosis H37Rv] [MASS=72353]	gi|15609014|ref|NP_216393.1|	3
112	Rv1884c	RpfC	PROBABLE RESUSCITATION-PROMOTING FACTOR RPFC [Mycobacterium tuberculosis H37Rv] [MASS=18046]	gi|15609021|ref|NP_216400.1|	2
113	Rv1915	AceAa	PROBABLE ISOCITRATE LYASE aceAa [FIRST PART] (ISOCITRASE) (ISOCITRATASE) (ICL) [Mycobacterium tuberculosis H37Rv] [MASS=40490]	gi|15609052|ref|NP_216431.1|	2
114	Rv1935c	EchA13	enoyl-CoA hydratase [Mycobacterium tuberculosis H37Rv] [MASS=35250]	gi|15609072|ref|NP_216451.1|	3
115	Rv2000	Rv2000	hypothetical protein Rv2000 [Mycobacterium tuberculosis H37Rv] [MASS=59894]	gi|15609137|ref|NP_216516.1|	5
116	Rv2010	Rv2010	hypothetical protein Rv2010 [Mycobacterium tuberculosis H37Rv] [MASS=14731]	gi|15609147|ref|NP_216526.1|	2
117	Rv2017	Rv2017	POSSIBLE TRANSCRIPTIONAL REGULATORY PROTEIN [Mycobacterium tuberculosis H37Rv] [MASS=38605]	gi|15609154|ref|NP_216533.1|	3
118	Rv2024c	Rv2024c	hypothetical protein Rv2024c [Mycobacterium tuberculosis H37Rv] [MASS=57274]	gi|15609161|ref|NP_216540.1|	3
119	Rv2038c	Rv2038c	Probable sugar-transport ATP-binding protein ABC transporter [Mycobacterium tuberculosis H37Rv] [MASS=38887]	gi|15609175|ref|NP_216554.1|	2
120	Rv2051c	Ppm1	Polyprenol-monophosphomannose synthase Ppm1 [Mycobacterium tuberculosis H37Rv] [MASS=93824]	gi|15609188|ref|NP_216567.1|	2
121	Rv2075c	Rv2075c	Possible hypothetical exported or envelope protein [Mycobacterium tuberculosis H37Rv] [MASS=51580]	gi|15609212|ref|NP_216591.1|	2
122	Rv2088	PknJ	PROBABLE TRANSMEMBRANE SERINE/THREONINE-PROTEIN KINASE J PKNJ (PROTEIN KINASE J) (STPK J) [Mycobacterium tuberculosis H37Rv] [MASS=61595]	gi|15609225|ref|NP_216604.1|	4
123	Rv2110c	PrcB	proteasome (beta subunit) PrcB [Mycobacterium tuberculosis H37Rv] [MASS=30305]	gi|15609247|ref|NP_216626.1|	3
124	Rv2131c	CysQ	POSSIBLE MONOPHOSPHATASE CYSQ [Mycobacterium tuberculosis H37Rv] [MASS=28447]	gi|15609268|ref|NP_216647.1|	2
125	Rv2155c	MurD	UDP-N-acetylmuramoyl-L-alanyl-D-glutamate synthetase [Mycobacterium tuberculosis H37Rv] [MASS=49345]	gi|15609292|ref|NP_216671.1|	5
126	Rv2163c	PbpB	Probable penicillin-binding membrane protein pbpB [Mycobacterium tuberculosis H37Rv] [MASS=72536]	gi|15609300|ref|NP_216679.1|	3
127	Rv2186c	Rv2186c	hypothetical protein Rv2186c [Mycobacterium tuberculosis H37Rv] [MASS=14574]	gi|15609323|ref|NP_216702.1|	2
128	Rv2187	FadD15	Probable long-chain-fatty-acid-CoA ligase fadD15 (FATTY-ACID-CoA SYNTHETASE) (FATTY-ACID-CoA SYNTHASE) [Mycobacterium tuberculosis H37Rv] [MASS=64035]	gi|15609324|ref|NP_216703.1|	3
129	Rv2202c	CbhK	Probable carbohydrate kinase CbhK [Mycobacterium tuberculosis H37Rv] [MASS=34472]	gi|15609339|ref|NP_216718.1|	4
130	Rv2209	Rv2209	Probable conserved integral membrane protein [Mycobacterium tuberculosis H37Rv] [MASS=53579]	gi|15609346|ref|NP_216725.1|	3
131	Rv2213	PepB	leucyl aminopeptidase [Mycobacterium tuberculosis H37Rv] [MASS=53481]	gi|15609350|ref|NP_216729.1|	3
132	Rv2222c	GlnA2	PROBABLE GLUTAMINE SYNTHETASE GLNA2 (GLUTAMINE SYNTHASE) (GS-II) [Mycobacterium tuberculosis H37Rv] [MASS=49607]	gi|15609359|ref|NP_216738.1|	2
133	Rv2223c	Rv2223c	Probable exported protease [Mycobacterium tuberculosis H37Rv] [MASS=55077]	gi|15609360|ref|NP_216739.1|	4
134	Rv2240c	Rv2240c	hypothetical protein Rv2240c [Mycobacterium tuberculosis H37Rv] [MASS=27529]	gi|15609377|ref|NP_216756.1|	4
135	Rv2241	AceE	pyruvate dehydrogenase subunit E1 [Mycobacterium tuberculosis H37Rv] [MASS=100216]	gi|15609378|ref|NP_216757.1|	2
136	Rv2243	FabD	acyl-carrier-protein S-malonyltransferase [Mycobacterium tuberculosis H37Rv] [MASS=30788]	gi|15609380|ref|NP_216759.1|	2
137	Rv2259	MscR	Probable zinc-dependent alcohol dehydrogenase AdhE2 [Mycobacterium tuberculosis H37Rv] [MASS=37888]	gi|15609396|ref|NP_216775.1|	5
138	Rv2277c	Rv2277c	Possible glycerolphosphodiesterase [Mycobacterium tuberculosis H37Rv] [MASS=32163]	gi|15609414|ref|NP_216793.1|	2
139	Rv2293c	Rv2293c	hypothetical protein Rv2293c [Mycobacterium tuberculosis H37Rv] [MASS=25255]	gi|15609430|ref|NP_216809.1|	3
140	Rv2315c	Rv2315c	hypothetical protein Rv2315c [Mycobacterium tuberculosis H37Rv] [MASS=54578]	gi|15609452|ref|NP_216831.1|	3
141	Rv2323c	Rv2323c	hypothetical protein Rv2323c [Mycobacterium tuberculosis H37Rv] [MASS=32959]	gi|15609460|ref|NP_216839.1|	2
142	Rv2331	Rv2331	hypothetical protein Rv2331 [Mycobacterium tuberculosis H37Rv] [MASS=13736]	gi|15609468|ref|NP_216847.1|	3
143	Rv2349c	PlcC	PROBABLE PHOSPHOLIPASE C 3 PLCC [Mycobacterium tuberculosis H37Rv] [MASS=55047]	gi|15609486|ref|NP_216865.1|	3
144	Rv2363	AmiA2	amidase [Mycobacterium tuberculosis H37Rv] [MASS=50883]	gi|15609500|ref|NP_216879.1|	3
145	Rv2381c	MbtD	POLYKETIDE SYNTHETASE MBTD (POLYKETIDE SYNTHASE) [Mycobacterium tuberculosis H37Rv] [MASS=105591]	gi|15609518|ref|NP_216897.1|	3
146	Rv2382c	MbtC	POLYKETIDE SYNTHETASE MBTC (POLYKETIDE SYNTHASE) [Mycobacterium tuberculosis H37Rv] [MASS=46624]	gi|15609519|ref|NP_216898.1|	4
147	Rv2383c	MbtB	PHENYLOXAZOLINE SYNTHASE MBTB (PHENYLOXAZOLINE SYNTHETASE) [Mycobacterium tuberculosis H37Rv] [MASS=151633]	gi|15609520|ref|NP_216899.1|	3
148	Rv2384	MbtA	BIFUNCTIONAL ENZYME MBTA: SALICYL-AMP LIGASE (SAL-AMP LIGASE) + SALICYL-S-ArCP SYNTHETASE [Mycobacterium tuberculosis H37Rv] [MASS=59280]	gi|15609521|ref|NP_216900.1|	2
149	Rv2395	Rv2395	PROBABLE CONSERVED INTEGRAL MEMBRANE PROTEIN [Mycobacterium tuberculosis H37Rv] [MASS=68251]	gi|15609532|ref|NP_216911.1|	4
150	Rv2404c	LepA	GTP-binding protein LepA [Mycobacterium tuberculosis H37Rv] [MASS=72395]	gi|15609541|ref|NP_216920.1|	4
151	Rv2414c	Rv2414c	hypothetical protein Rv2414c [Mycobacterium tuberculosis H37Rv] [MASS=52812]	gi|15609551|ref|NP_216930.1|	3
152	Rv2418c	Rv2418c	hypothetical protein Rv2418c [Mycobacterium tuberculosis H37Rv] [MASS=27225]	gi|15609555|ref|NP_216934.1|	2
153	Rv2425c	Rv2425c	hypothetical protein Rv2425c [Mycobacterium tuberculosis H37Rv] [MASS=52590]	gi|15609562|ref|NP_216941.1|	3
154	Rv2444c	Rne	POSSIBLE RIBONUCLEASE E RNE [Mycobacterium tuberculosis H37Rv] [MASS=103390]	gi|15609581|ref|NP_216960.1|	2
155	Rv2459	Rv2459	PROBABLE CONSERVED INTEGRAL MEMBRANE TRANSPORT PROTEIN [Mycobacterium tuberculosis H37Rv] [MASS=53479]	gi|15609596|ref|NP_216975.1|	2
156	Rv2476c	Gdh	PROBABLE NAD-DEPENDENT GLUTAMATE DEHYDROGENASE GDH (NAD-GDH) (NAD-DEPENDENT GLUTAMIC DEHYDROGENASE) [Mycobacterium tuberculosis H37Rv] [MASS=176899]	gi|15609613|ref|NP_216992.1|	4
157	Rv2505c	FadD35	acyl-CoA synthetase [Mycobacterium tuberculosis H37Rv] [MASS=59778]	gi|15609642|ref|NP_217021.1|	4
158	Rv2524c	Fas	PROBABLE FATTY ACID SYNTHASE FAS (FATTY ACID SYNTHETASE) [Mycobacterium tuberculosis H37Rv] [MASS=326252]	gi|15609661|ref|NP_217040.1|	10
159	Rv2555c	AlaS	alanyl-tRNA synthetase [Mycobacterium tuberculosis H37Rv] [MASS=97356]	gi|15609692|ref|NP_217071.1|	3
160	Rv2563	Rv2563	PROBABLE GLUTAMINE-TRANSPORT TRANSMEMBRANE PROTEIN ABC TRANSPORTER [Mycobacterium tuberculosis H37Rv] [MASS=36025]	gi|15609700|ref|NP_217079.1|	2
161	Rv2566	Rv2566	LONG CONSERVED HYPOTHETICAL PROTEIN [Mycobacterium tuberculosis H37Rv] [MASS=124535]	gi|15609703|ref|NP_217082.1|	6
162	Rv2567	Rv2567	CONSERVED HYPOTHETICAL ALANINE AND LEUCINE RICH PROTEIN [Mycobacterium tuberculosis H37Rv] [MASS=95448]	gi|15609704|ref|NP_217083.1|	2
163	Rv2637	DedA	POSSIBLE TRANSMEMBRANE PROTEIN DEDA [Mycobacterium tuberculosis H37Rv] [MASS=23003]	gi|15609774|ref|NP_217153.1|	2
164	Rv2671	RibD	hypothetical protein Rv2671 [Mycobacterium tuberculosis H37Rv] [MASS=27693]	gi|15609808|ref|NP_217187.1|	3
165	Rv2690c	Rv2690c	PROBABLE CONSERVED INTEGRAL MEMBRANE ALANINE AND VALINE AND LEUCINE RICH PROTEIN [Mycobacterium tuberculosis H37Rv] [MASS=70802]	gi|15609827|ref|NP_217206.1|	5
166	Rv2773c	DapB	dihydrodipicolinate reductase [Mycobacterium tuberculosis H37Rv] [MASS=25733]	gi|15609910|ref|NP_217289.1|	2
167	Rv2811	Rv2811	hypothetical protein Rv2811 [Mycobacterium tuberculosis H37Rv] [MASS=21118]	gi|15609948|ref|NP_217327.1|	4
168	Rv2842	Rv2824c	hypothetical protein Rv2824c [Mycobacterium tuberculosis H37Rv] [MASS=34432]	gi|15609961|ref|NP_217340.1|	2
169	Rv2829c	Rv2829c	hypothetical protein Rv2829c [Mycobacterium tuberculosis H37Rv] [MASS=14611]	gi|15609966|ref|NP_217345.1|	2
170	Rv2846c	EfpA	POSSIBLE INTEGRAL MEMBRANE EFFLUX PROTEIN EFPA [Mycobacterium tuberculosis H37Rv] [MASS=55579]	gi|15609983|ref|NP_217362.1|	4
171	Rv2874	Rv2874	POSSIBLE INTEGRAL MEMBRANE C-TYPE CYTOCHROME BIOGENESIS PROTEIN DIPZ [Mycobacterium tuberculosis H37Rv] [MASS=74168]	gi|15610011|ref|NP_217390.1|	5
172	Rv2900c	FdhF	POSSIBLE FORMATE DEHYDROGENASE H FDHF (FORMATE-HYDROGEN-LYASE-LINKED, SELENOCYSTEINE-CONTAINING POLYPEPTIDE) (FORMATE DEHYDROGENASE-H ALPHA SUBUNIT) (FDH-H) [Mycobacterium tuberculosis H37Rv] [MASS=84566]	gi|15610037|ref|NP_217416.1|	2
173	Rv2915c	Rv2915c	hypothetical protein Rv2915c [Mycobacterium tuberculosis H37Rv] [MASS=39770]	gi|15610052|ref|NP_217431.1|	2
174	Rv2931	PpsA	PHENOLPTHIOCEROL SYNTHESIS TYPE-I POLYKETIDE SYNTHASE PPSA [Mycobacterium tuberculosis H37Rv] [MASS=198834]	gi|15610068|ref|NP_217447.1|	5
175	Rv2932	PpsB	PHENOLPTHIOCEROL SYNTHESIS TYPE-I POLYKETIDE SYNTHASE PPSB [Mycobacterium tuberculosis H37Rv] [MASS=162527]	gi|15610069|ref|NP_217448.1|	5
176	Rv2933	PpsC	PHENOLPTHIOCEROL SYNTHESIS TYPE-I POLYKETIDE SYNTHASE PPSC [Mycobacterium tuberculosis H37Rv] [MASS=230620]	gi|15610070|ref|NP_217449.1|	3
177	Rv2934	PpsD	PHENOLPTHIOCEROL SYNTHESIS TYPE-I POLYKETIDE SYNTHASE PPSD [Mycobacterium tuberculosis H37Rv] [MASS=193313]	gi|15610071|ref|NP_217450.1|	10
178	Rv2936	DrrA	PROBABLE DAUNORUBICIN-DIM-TRANSPORT ATP-BINDING PROTEIN ABC TRANSPORTER DRRA [Mycobacterium tuberculosis H37Rv] [MASS=35818]	gi|15610073|ref|NP_217452.1|	2
179	Rv2939	PapA5	acyltransferase PapA5 [Mycobacterium tuberculosis H37Rv] [MASS=45429]	gi|15610076|ref|NP_217455.1|	2
180	Rv2940c	Mas	PROBABLE MULTIFUNCTIONAL MYCOCEROSIC ACID SYNTHASE MEMBRANE-ASSOCIATED MAS [Mycobacterium tuberculosis H37Rv] [MASS=224378]	gi|15610077|ref|NP_217456.1|	4
181	Rv2941	FadD28	acyl-CoA synthetase [Mycobacterium tuberculosis H37Rv] [MASS=62640]	gi|15610078|ref|NP_217457.1|	5
182	Rv2947c	Pks15	PROBABLE POLYKETIDE SYNTHASE PKS15 [Mycobacterium tuberculosis H37Rv] [MASS=51701]	gi|15610084|ref|NP_217463.1|	2
183	Rv2967c	Pca	pyruvate carboxylase [Mycobacterium tuberculosis H37Rv] [MASS=120423]	gi|15610104|ref|NP_217483.1|	4
184	Rv2981c	DdlA	D-alanyl-alanine synthetase A [Mycobacterium tuberculosis H37Rv] [MASS=39710]	gi|15610118|ref|NP_217497.1|	2
185	Rv2982c	GpdA2	NAD(P)H-dependent glycerol-3-phosphate dehydrogenase [Mycobacterium tuberculosis H37Rv] [MASS=33992]	gi|15610119|ref|NP_217498.1|	3
186	Rv2983	Rv2983	CONSERVED HYPOTHETICAL ALANINE RICH PROTEIN [Mycobacterium tuberculosis H37Rv] [MASS=21819]	gi|15610120|ref|NP_217499.1|	3
187	Rv2994	Rv2994	PROBABLE CONSERVED INTEGRAL MEMBRANE PROTEIN [Mycobacterium tuberculosis H37Rv] [MASS=47046]	gi|15610131|ref|NP_217510.1|	3
188	Rv3009c	GatB	aspartyl/glutamyl-tRNA amidotransferase subunit B [Mycobacterium tuberculosis H37Rv] [MASS=54633]	gi|15610146|ref|NP_217525.1|	5
189	Rv3031	Rv3031	hypothetical protein Rv3031 [Mycobacterium tuberculosis H37Rv] [MASS=57815]	gi|15610168|ref|NP_217547.1|	3
190	Rv3035	Rv3035	hypothetical protein Rv3035 [Mycobacterium tuberculosis H37Rv] [MASS=37323]	gi|15610172|ref|NP_217551.1|	3
191	Rv3043c	CtaD	PROBABLE CYTOCHROME C OXIDASE POLYPEPTIDE I CTAD (CYTOCHROME AA3 SUBUNIT 1) [Mycobacterium tuberculosis H37Rv] [MASS=63672]	gi|15610180|ref|NP_217559.1|	4
192	Rv3063	CstA	PROBABLE CARBON STARVATION PROTEIN A HOMOLOG CSTA [Mycobacterium tuberculosis H37Rv] [MASS=80163]	gi|15610200|ref|NP_217579.1|	3
193	Rv3080c	PknK	PROBABLE SERINE/THREONINE-PROTEIN KINASE TRANSCRIPTIONAL REGULATORY PROTEIN PKNK (PROTEIN KINASE K) (STPK K) [Mycobacterium tuberculosis H37Rv] [MASS=119417]	gi|15610217|ref|NP_217596.1|	2
194	Rv3083	Rv3083	PROBABLE MONOOXYGENASE (HYDROXYLASE) [Mycobacterium tuberculosis H37Rv] [MASS=55482]	gi|15610220|ref|NP_217599.1|	3
195	Rv3193c	Rv3193c	hypothetical protein Rv3193c [Mycobacterium tuberculosis H37Rv] [MASS=107501]	gi|15610329|ref|NP_217709.1|	4
196	Rv3220c	Rv3220c	PROBABLE TWO COMPONENT SENSOR KINASE [Mycobacterium tuberculosis H37Rv] [MASS=54012]	gi|15610356|ref|NP_217736.1|	4
197	Rv3234c	Rv3234c	hypothetical protein Rv3234c [Mycobacterium tuberculosis H37Rv] [MASS=30379]	gi|15610370|ref|NP_217751.1|	2
198	Rv3239c	Rv3239c	PROBABLE CONSERVED TRANSMEMBRANE TRANSPORT PROTEIN [Mycobacterium tuberculosis H37Rv] [MASS=110198]	gi|15610375|ref|NP_217756.1|	2
199	Rv3241c	Rv3241c	hypothetical protein Rv3241c [Mycobacterium tuberculosis H37Rv] [MASS=24567]	gi|15610377|ref|NP_217758.1|	2
200	Rv3295	Rv3295	PROBABLE TRANSCRIPTIONAL REGULATORY PROTEIN (PROBABLY TETR-FAMILY) [Mycobacterium tuberculosis H37Rv] [MASS=24805]	gi|15610431|ref|NP_217812.1|	2
201	Rv3296	Lhr	PROBABLE ATP-DEPENDENT HELICASE LHR (LARGE HELICASE-RELATED PROTEIN) [Mycobacterium tuberculosis H37Rv] [MASS=161378]	gi|15610432|ref|NP_217813.1|	3
202	Rv3318	SdhA	succinate dehydrogenase flavoprotein subunit [Mycobacterium tuberculosis H37Rv] [MASS=64825]	gi|15610454|ref|NP_217835.1|	4
203	Rv3332	NagA	PROBABLE N-ACETYLGLUCOSAMINE-6-PHOSPHATE DEACETYLASE NAGA (GLCNAC 6-P DEACETYLASE) [Mycobacterium tuberculosis H37Rv] [MASS=38805]	gi|15610468|ref|NP_217849.1|	3
204	Rv3335c	Rv3335c	PROBABLE CONSERVED INTEGRAL MEMBRANE PROTEIN [Mycobacterium tuberculosis H37Rv] [MASS=31293]	gi|15610471|ref|NP_217852.1|	2
205	Rv3366	SpoU	PROBABLE tRNA/rRNA METHYLASE SPOU (tRNA/rRNA METHYLTRANSFERASE) [Mycobacterium tuberculosis H37Rv] [MASS=16517]	gi|15610502|ref|NP_217883.1|	2
206	Rv3373	EchA18	PROBABLE ENOYL-CoA HYDRATASE ECHA18 (ENOYL HYDRASE) (UNSATURATED ACYL-CoA HYDRATASE) (CROTONASE) [Mycobacterium tuberculosis H37Rv] [MASS=22662]	gi|15610509|ref|NP_217890.1|	3
207	Rv3383c	IdsB	POSSIBLE POLYPRENYL SYNTHETASE IDSB (POLYPRENYL TRANSFERASE) (POLYPRENYL DIPHOSPHATE SYNTHASE) [Mycobacterium tuberculosis H37Rv] [MASS=36432]	gi|15610519|ref|NP_217900.1|	2
208	Rv3403c	Rv3403c	hypothetical protein Rv3403c [Mycobacterium tuberculosis H37Rv] [MASS=57880]	gi|15610539|ref|NP_217920.1|	5
209	Rv3436c	GlmS	D-fructose-6-phosphate amidotransferase [Mycobacterium tuberculosis H37Rv] [MASS=67571]	gi|15610572|ref|NP_217953.1|	4
210	Rv3447c	Rv3447c	PROBABLE CONSERVED MEMBRANE PROTEIN [Mycobacterium tuberculosis H37Rv] [MASS=131895]	gi|15610583|ref|NP_217964.1|	4
211	Rv3449	MycP4	PROBABLE MEMBRANE-ANCHORED MYCOSIN MYCP4 (SERINE PROTEASE) (SUBTILISIN-LIKE PROTEASE) (SUBTILASE-LIKE) (MYCOSIN-4) [Mycobacterium tuberculosis H37Rv] [MASS=46016]	gi|15610585|ref|NP_217966.1|	3
212	Rv3470c	IlvB2	PROBABLE ACETOLACTATE SYNTHASE (LARGE SUBUNIT) ILVB2 (AHAS) (ACETOHYDROXY-ACID SYNTHASE LARGE SUBUNIT) (ALS) [Mycobacterium tuberculosis H37Rv] [MASS=57256]	gi|15610606|ref|NP_217987.1|	3
213	Rv3494c	Mce4F	MCE-FAMILY PROTEIN MCE4F [Mycobacterium tuberculosis H37Rv] [MASS=59636]	gi|15610630|ref|NP_218011.1|	3
214	Rv3521	Rv3521	hypothetical protein Rv3521 [Mycobacterium tuberculosis H37Rv] [MASS=33002]	gi|15610657|ref|NP_218038.1|	3
215	Rv3554	FdxB	POSSIBLE ELECTRON TRANSFER PROTEIN FDXB [Mycobacterium tuberculosis H37Rv] [MASS=76565]	gi|15610690|ref|NP_218071.1|	3
216	Rv3561	FadD3	acyl-CoA synthetase [Mycobacterium tuberculosis H37Rv] [MASS=54094]	gi|15610697|ref|NP_218078.1|	4
217	Rv3573c	FadE34	PROBABLE ACYL-CoA DEHYDROGENASE FADE34 [Mycobacterium tuberculosis H37Rv] [MASS=74578]	gi|15610709|ref|NP_218090.1|	2
218	Rv3610c	FtsH	MEMBRANE-BOUND PROTEASE FTSH (CELL DIVISION PROTEIN) [Mycobacterium tuberculosis H37Rv] [MASS=81985]	gi|15610746|ref|NP_218127.1|	2
219	Rv3626c	Rv3626c	hypothetical protein Rv3626c [Mycobacterium tuberculosis H37Rv] [MASS=38439]	gi|15610762|ref|NP_218143.1|	3
220	Rv3630	Rv3630	PROBABLE CONSERVED INTEGRAL MEMBRANE PROTEIN [Mycobacterium tuberculosis H37Rv] [MASS=43485]	gi|15610766|ref|NP_218147.1|	4
221	Rv3672c	Rv3672c	hypothetical protein Rv3672c [Mycobacterium tuberculosis H37Rv] [MASS=28891]	gi|15610808|ref|NP_218189.1|	3
222	Rv3676	Rv3676	PROBABLE TRANSCRIPTIONAL REGULATORY PROTEIN (PROBABLY CRP/FNR-FAMILY) [Mycobacterium tuberculosis H37Rv] [MASS=24791]	gi|15610812|ref|NP_218193.1|	3
223	Rv3712	Rv3712	POSSIBLE LIGASE [Mycobacterium tuberculosis H37Rv] [MASS=43421]	gi|15610848|ref|NP_218229.1|	3
224	Rv3720	Rv3720	POSSIBLE FATTY ACID SYNTHASE [Mycobacterium tuberculosis H37Rv] [MASS=46852]	gi|15610856|ref|NP_218237.1|	4
225	Rv3727	Rv3727	POSSIBLE OXIDOREDUCTASE [Mycobacterium tuberculosis H37Rv] [MASS=66293]	gi|15610863|ref|NP_218244.1|	2
226	Rv3730c	Rv3730c	hypothetical protein Rv3730c [Mycobacterium tuberculosis H37Rv] [MASS=38543]	gi|15610866|ref|NP_218247.1|	2
227	Rv3736	Rv3736	TRANSCRIPTIONAL REGULATORY PROTEIN (PROBABLY ARAC/XYLS-FAMILY) [Mycobacterium tuberculosis H37Rv] [MASS=37973]	gi|15610872|ref|NP_218253.1|	3
228	Rv3757c	ProW	POSSIBLE OSMOPROTECTANT (GLYCINE BETAINE/CARNITINE/CHOLINE/L-PROLINE) TRANSPORT INTEGRAL MEMBRANE PROTEIN ABC TRANSPORTER PROW [Mycobacterium tuberculosis H37Rv] [MASS=24109]	gi|15610893|ref|NP_218274.1|	3
229	Rv3766	Rv3766	hypothetical protein Rv3766 [Mycobacterium tuberculosis H37Rv] [MASS=24605]	gi|15610902|ref|NP_218283.1|	2
230	Rv3785	Rv3785	hypothetical protein Rv3785 [Mycobacterium tuberculosis H37Rv] [MASS=38931]	gi|15610921|ref|NP_218302.1|	2
231	Rv3793	EmbC	INTEGRAL MEMBRANE INDOLYLACETYLINOSITOL ARABINOSYLTRANSFERASE EMBC (ARABINOSYLINDOLYLACETYLINOSITOL SYNTHASE) [Mycobacterium tuberculosis H37Rv] [MASS=117489]	gi|15610929|ref|NP_218310.1|	6
232	Rv3823c	MmpL8	PROBABLE CONSERVED INTEGRAL MEMBRANE TRANSPORT PROTEIN MMPL8 [Mycobacterium tuberculosis H37Rv] [MASS=115997]	gi|15610959|ref|NP_218340.1|	5
233	Rv3829c	Rv3829c	PROBABLE DEHYDROGENASE [Mycobacterium tuberculosis H37Rv] [MASS=57073]	gi|15610965|ref|NP_218346.1|	4
234	Rv3859c	GltB	PROBABLE FERREDOXIN-DEPENDENT GLUTAMATE SYNTHASE [NADPH] (LARGE SUBUNIT) GLTB (L-GLUTAMATE SYNTHASE) (L-GLUTAMATE SYNTHETASE) (NADH-GLUTAMATE SYNTHASE) (GLUTAMATE SYNTHASE (NADH))(NADPH-GOGAT) [Mycobacterium tuberculosis H37Rv] [MASS=165942]	gi|15610995|ref|NP_218376.1|	7
235	Rv3868	Rv3868	hypothetical protein Rv3868 [Mycobacterium tuberculosis H37Rv] [MASS=62425]	gi|15611004|ref|NP_218385.1|	4
236	Rv3869	Rv3869	POSSIBLE CONSERVED MEMBRANE PROTEIN [Mycobacterium tuberculosis H37Rv] [MASS=51092]	gi|15611005|ref|NP_218386.1|	3
237	Rv3887c	Rv3887c	PROBABLE CONSERVED TRANSMEMBRANE PROTEIN [Mycobacterium tuberculosis H37Rv] [MASS=53278]	gi|15611023|ref|NP_218404.1|	4
238	Rv3894c	Rv3894c	POSSIBLE CONSERVED MEMBRANE PROTEIN [Mycobacterium tuberculosis H37Rv] [MASS=153699]	gi|15611030|ref|NP_218411.1|	5
239	Rv3898c	Rv3898c	hypothetical protein Rv3898c [Mycobacterium tuberculosis H37Rv] [MASS=10875]	gi|15611034|ref|NP_218415.1|	2
240	Rv2950c	FadD29	acyl-CoA synthetase [Mycobacterium tuberculosis H37Rv] [MASS=63657]	gi|161352463|ref|NP_217466.2|	4
241	Rv1248c	SucA	alpha-ketoglutarate decarboxylase [Mycobacterium tuberculosis H37Rv] [MASS=135901]	gi|161352467|ref|NP_215764.2|	4
242	Rv0124	PE_PGRS2	PE-PGRS FAMILY PROTEIN [Mycobacterium tuberculosis H37Rv] [MASS=40890]	gi|57116692|ref|YP_177693.1|	3
243	Rv0151c	PE1	PE FAMILY PROTEIN [Mycobacterium tuberculosis H37Rv] [MASS=61411]	gi|57116694|ref|YP_177695.1|	2
244	Rv0160c	PE4	PE FAMILY PROTEIN [Mycobacterium tuberculosis H37Rv] [MASS=53055]	gi|57116697|ref|YP_177698.1|	4
245	Rv0278c	PE_PGRS3	PE-PGRS FAMILY PROTEIN [Mycobacterium tuberculosis H37Rv] [MASS=81904]	gi|57116712|ref|YP_177707.1|	5
246	Rv0279c	PE_PGRS4	PE-PGRS FAMILY PROTEIN [Mycobacterium tuberculosis H37Rv] [MASS=68986]	gi|57116713|ref|YP_177708.1|	3
247	Rv0304c	PPE5	PPE FAMILY PROTEIN [Mycobacterium tuberculosis H37Rv] [MASS=215693]	gi|57116719|ref|YP_177714.1|	3
248	Rv0355c	PPE8	PPE FAMILY PROTEIN [Mycobacterium tuberculosis H37Rv] [MASS=327028]	gi|57116726|ref|YP_177721.1|	7
249	Rv0438c	MoeA2	PROBABLE MOLYBDOPTERIN BIOSYNTHESIS PROTEIN MOEA2 [Mycobacterium tuberculosis H37Rv] [MASS=42021]	gi|57116730|ref|YP_177725.1|	4
250	Rv0442c	PPE10	PPE FAMILY PROTEIN [Mycobacterium tuberculosis H37Rv] [MASS=47246]	gi|57116731|ref|YP_177726.1|	3
251	Rv0453	PPE11	PPE FAMILY PROTEIN [Mycobacterium tuberculosis H37Rv] [MASS=52836]	gi|57116732|ref|YP_177727.1|	3
252	Rv0494	Rv0494	PROBABLE TRANSCRIPTIONAL REGULATORY PROTEIN (PROBABLY GNTR-FAMILY) [Mycobacterium tuberculosis H37Rv] [MASS=26014]	gi|57116742|ref|NP_215008.2|	2
253	Rv0746	PE_PGRS9	PE-PGRS FAMILY PROTEIN [Mycobacterium tuberculosis H37Rv] [MASS=64157]	gi|57116773|ref|YP_177750.1|	7
254	Rv0747	PE_PGRS10	PE-PGRS FAMILY PROTEIN [Mycobacterium tuberculosis H37Rv] [MASS=65406]	gi|57116774|ref|YP_177751.1|	5
255	Rv0754	PE_PGRS11	PE-PGRS FAMILY PROTEIN [Mycobacterium tuberculosis H37Rv] [MASS=56945]	gi|57116776|ref|YP_177752.1|	3
256	Rv0761c	AdhB	POSSIBLE ZINC-CONTAINING ALCOHOL DEHYDROGENASE NAD DEPENDENT ADHB [Mycobacterium tuberculosis H37Rv] [MASS=39747]	gi|57116779|ref|YP_177754.1|	2
257	Rv0794c	Rv0794c	PROBABLE OXIDOREDUCTASE [Mycobacterium tuberculosis H37Rv] [MASS=52476]	gi|57116784|ref|YP_177756.1|	3
258	Rv0834c	PE_PGRS14	PE-PGRS FAMILY PROTEIN [Mycobacterium tuberculosis H37Rv] [MASS=71698]	gi|57116789|ref|YP_177761.1|	4
259	Rv0872c	PE_PGRS15	PE-PGRS FAMILY PROTEIN [Mycobacterium tuberculosis H37Rv] [MASS=50267]	gi|57116793|ref|YP_177763.1|	5
260	Rv1067c	PE_PGRS19	PE-PGRS FAMILY PROTEIN [Mycobacterium tuberculosis H37Rv] [MASS=54724]	gi|57116818|ref|YP_177780.1|	6
261	Rv1091	PE_PGRS22	PE-PGRS FAMILY PROTEIN [Mycobacterium tuberculosis H37Rv] [MASS=68316]	gi|57116826|ref|YP_177786.1|	6
262	Rv1243c	PE_PGRS23	PE-PGRS FAMILY PROTEIN [Mycobacterium tuberculosis H37Rv] [MASS=47285]	gi|57116845|ref|YP_177798.1|	6
263	Rv1325c	PE_PGRS24	PE-PGRS FAMILY PROTEIN [Mycobacterium tuberculosis H37Rv] [MASS=49574]	gi|57116848|ref|YP_177799.1|	6
264	Rv1327c	GlgE	PROBABLE GLUCANASE GLGE [Mycobacterium tuberculosis H37Rv] [MASS=78639]	gi|57116849|ref|NP_215843.2|	5
265	Rv1372	Rv1372	hypothetical protein Rv1372 [Mycobacterium tuberculosis H37Rv] [MASS=42032]	gi|57116854|ref|YP_177803.1|	2
266	Rv1384	CarB	carbamoyl phosphate synthase large subunit [Mycobacterium tuberculosis H37Rv] [MASS=118960]	gi|57116856|ref|YP_177804.1|	7
267	Rv1468c	PE_PGRS29	PE-PGRS FAMILY PROTEIN [Mycobacterium tuberculosis H37Rv] [MASS=32215]	gi|57116869|ref|YP_177814.1|	3
268	Rv1548c	PPE21	PPE FAMILY PROTEIN [Mycobacterium tuberculosis H37Rv] [MASS=66736]	gi|57116882|ref|YP_177817.1|	2
269	Rv1562c	TreZ	Maltooligosyltrehalose trehalohydrolase TreZ [Mycobacterium tuberculosis H37Rv] [MASS=64076]	gi|57116884|ref|YP_177819.1|	3
270	Rv1563c	TreY	Maltooligosyltrehalose synthase TreY [Mycobacterium tuberculosis H37Rv] [MASS=82706]	gi|57116885|ref|YP_177820.1|	3
271	Rv1651c	PE_PGRS30	PE-PGRS FAMILY PROTEIN [Mycobacterium tuberculosis H37Rv] [MASS=88454]	gi|57116897|ref|YP_177826.1|	7
272	Rv1705c	PPE22	PPE FAMILY PROTEIN [Mycobacterium tuberculosis H37Rv] [MASS=38443]	gi|57116898|ref|YP_177827.1|	3
273	Rv1759c	Wag22	PE-PGRS FAMILY PROTEIN [Mycobacterium tuberculosis H37Rv] [MASS=74353]	gi|57116905|ref|YP_177831.1|	6
274	Rv1768	PE_PGRS31	PE-PGRS FAMILY PROTEIN [Mycobacterium tuberculosis H37Rv] [MASS=51962]	gi|57116908|ref|YP_177832.1|	4
275	Rv1802	PPE30	PPE FAMILY PROTEIN [Mycobacterium tuberculosis H37Rv] [MASS=46021]	gi|57116917|ref|YP_177841.1|	4
276	Rv1803c	PE_PGRS32	PE-PGRS FAMILY PROTEIN [Mycobacterium tuberculosis H37Rv] [MASS=54881]	gi|57116918|ref|YP_177842.1|	4
277	Rv1844c	Gnd1	6-phosphogluconate dehydrogenase [Mycobacterium tuberculosis H37Rv] [MASS=51547]	gi|57116925|ref|YP_177848.1|	3
278	Rv1917c	PPE34	PPE FAMILY PROTEIN [Mycobacterium tuberculosis H37Rv] [MASS=142943]	gi|57116928|ref|YP_177655.1|	4
279	Rv1918c	PPE35	PPE FAMILY PROTEIN [Mycobacterium tuberculosis H37Rv] [MASS=97950]	gi|57116929|ref|YP_177850.1|	4
280	Rv2006	OtsB1	PROBABLE TREHALOSE-6-PHOSPHATE PHOSPHATASE OTSB1 (TREHALOSE-PHOSPHATASE) (TPP) [Mycobacterium tuberculosis H37Rv] [MASS=145783]	gi|57116935|ref|YP_177855.1|	4
281	Rv2162c	PE_PGRS38	PE-PGRS FAMILY PROTEIN [Mycobacterium tuberculosis H37Rv] [MASS=44478]	gi|57116953|ref|YP_177865.1|	4
282	Rv2487c	PE_PGRS42	PE-PGRS FAMILY PROTEIN [Mycobacterium tuberculosis H37Rv] [MASS=57217]	gi|57116995|ref|YP_177886.1|	6
283	Rv2490c	PE_PGRS43	PE-PGRS FAMILY PROTEIN [Mycobacterium tuberculosis H37Rv] [MASS=133123]	gi|57116996|ref|YP_177887.1|	8
284	Rv2601	SpeE	spermidine synthase [Mycobacterium tuberculosis H37Rv] [MASS=54683]	gi|57117003|ref|YP_177892.1|	2
285	Rv2612c	PgsA1	PROBABLE PI SYNTHASE PGSA1 (PHOSPHATIDYLINOSITOL SYNTHASE) (CDP-DIACYLGLYCEROL--INOSITOL3-PHOSPHATIDYLTRANSFERASE) [Mycobacterium tuberculosis H37Rv] [MASS=23251]	gi|57117006|ref|YP_177894.1|	3
286	Rv2631	Rv2631	hypothetical protein Rv2631 [Mycobacterium tuberculosis H37Rv] [MASS=45528]	gi|57117009|ref|NP_217147.2|	4
287	Rv2634c	PE_PGRS46	PE-PGRS FAMILY PROTEIN [Mycobacterium tuberculosis H37Rv] [MASS=63130]	gi|57117010|ref|YP_177896.1|	5
288	Rv2768c	PPE43	PPE FAMILY PROTEIN [Mycobacterium tuberculosis H37Rv] [MASS=38627]	gi|57117022|ref|YP_177906.1|	4
289	Rv2769c	PE27	PE FAMILY PROTEIN [Mycobacterium tuberculosis H37Rv] [MASS=26381]	gi|57117023|ref|YP_177907.1|	3
290	Rv2853	PE_PGRS48	PE-PGRS FAMILY PROTEIN [Mycobacterium tuberculosis H37Rv] [MASS=51256]	gi|57117029|ref|YP_177909.1|	3
291	Rv3077	Rv3077	POSSIBLE HYDROLASE [Mycobacterium tuberculosis H37Rv] [MASS=66740]	gi|57117053|ref|YP_177923.1|	3
292	Rv3136	PPE51	PPE FAMILY PROTEIN [Mycobacterium tuberculosis H37Rv] [MASS=37980]	gi|57117065|ref|YP_177935.1|	2
293	Rv3343c	PPE54	PPE FAMILY PROTEIN [Mycobacterium tuberculosis H37Rv] [MASS=250344]	gi|57117092|ref|YP_177960.1|	4
294	Rv3345c	PE_PGRS50	PE-PGRS FAMILY PROTEIN [Mycobacterium tuberculosis H37Rv] [MASS=129384]	gi|57117094|ref|YP_177962.1|	5
295	Rv3347c	PPE55	PPE FAMILY PROTEIN [Mycobacterium tuberculosis H37Rv] [MASS=309556]	gi|57117095|ref|YP_177963.1|	6
296	Rv3350c	PPE56	PPE FAMILY PROTEIN [Mycobacterium tuberculosis H37Rv] [MASS=363348]	gi|57117096|ref|YP_177964.1|	8
297	Rv3388	PE_PGRS52	PE-PGRS FAMILY PROTEIN [Mycobacterium tuberculosis H37Rv] [MASS=60454]	gi|57117101|ref|YP_177968.1|	3
298	Rv3395c	Rv3395c	hypothetical protein Rv3395c [Mycobacterium tuberculosis H37Rv] [MASS=20793]	gi|57117102|ref|NP_217912.2|	2
299	Rv3479	Rv3479	POSSIBLE TRANSMEMBRANE PROTEIN [Mycobacterium tuberculosis H37Rv] [MASS=109259]	gi|57117112|ref|NP_217996.2|	3
300	Rv3507	PE_PGRS53	PE-PGRS FAMILY PROTEIN [Mycobacterium tuberculosis H37Rv] [MASS=110622]	gi|57117114|ref|YP_177978.1|	7
301	Rv3512	PE_PGRS56	PE-PGRS FAMILY PROTEIN [Mycobacterium tuberculosis H37Rv] [MASS=81161]	gi|57117117|ref|YP_177981.1|	7
302	Rv3514	PE_PGRS57	PE-PGRS FAMILY PROTEIN [Mycobacterium tuberculosis H37Rv] [MASS=115752]	gi|57117118|ref|YP_177982.1|	8
303	Rv3515c	FadD19	acyl-CoA synthetase [Mycobacterium tuberculosis H37Rv] [MASS=59740]	gi|57117119|ref|YP_177983.1|	2
304	Rv3576	LppH	POSSIBLE CONSERVED LIPOPROTEIN LPPH [Mycobacterium tuberculosis H37Rv] [MASS=25052]	gi|57117127|ref|YP_177991.1|	3
305	Rv3590c	PE_PGRS58	PE-PGRS FAMILY PROTEIN [Mycobacterium tuberculosis H37Rv] [MASS=48398]	gi|57117129|ref|YP_177993.1|	5
306	Rv3596c	ClpC1	PROBABLE ATP-DEPENDENT PROTEASE ATP-BINDING SUBUNIT CLPC1 [Mycobacterium tuberculosis H37Rv] [MASS=93552]	gi|57117131|ref|YP_177995.1|	3
307	Rv3604c	Rv3604c	PROBABLE CONSERVED TRANSMEMBRANE PROTEIN RICH IN ALANINE AND ARGININE AND PROLINE [Mycobacterium tuberculosis H37Rv] [MASS=43058]	gi|57117132|ref|NP_218121.2|	2
308	Rv3621c	PPE65	PPE FAMILY PROTEIN [Mycobacterium tuberculosis H37Rv] [MASS=40680]	gi|57117135|ref|YP_177998.1|	4
309	Rv3812	PE_PGRS62	PE-PGRS FAMILY PROTEIN [Mycobacterium tuberculosis H37Rv] [MASS=51821]	gi|57117161|ref|YP_178019.1|	2
310	Rv3915	Rv3915	PROBABLE HYDROLASE [Mycobacterium tuberculosis H37Rv] [MASS=43911]	gi|57117169|ref|YP_178027.1|	2
