# Supplementary material for: Portrait of a Pathogen: The Mycobacterium tuberculosis Proteome In Vivo
Source: PLoS One. 2010 Nov 11;5(11):e13938. doi: 10.1371/journal.pone.0013938 (PMC2978697; doi:10.1371/journal.pone.0013938)
Supplement: Table S2 — Mtb proteins identified in 90-day infected guinea pig lungs. Data includes number of unique peptides identified for each protein. (0.10 MB XLS) [file pone.0013938.s002.xls]

## Sheet: SupplementaryTable#2
Table S2. Mtb Proteins Identified in 90-day Infected Guinea Pig Lungs
#	ORF	Protein Name	Protein Description [Protein Mass in Da]	Accession Number	Number of Unique Peptides Identified at 90 Days
1	Rv0001	DnaA	chromosomal replication initiation protein [Mycobacterium tuberculosis H37Rv] [MASS=56566]	gi|15607143|ref|NP_214515.1|	2
2	Rv0014c	PknB	TRANSMEMBRANE SERINE/THREONINE-PROTEIN KINASE B PKNB (PROTEIN KINASE B) (STPK B) [Mycobacterium tuberculosis H37Rv] [MASS=66509]	gi|15607156|ref|NP_214528.1|	5
3	Rv0015c	PknA	TRANSMEMBRANE SERINE/THREONINE-PROTEIN KINASE A PKNA (PROTEIN KINASE A) (STPK A) [Mycobacterium tuberculosis H37Rv] [MASS=45597]	gi|15607157|ref|NP_214529.1|	2
4	Rv0020c	TB39.8	hypothetical protein Rv0020c [Mycobacterium tuberculosis H37Rv] [MASS=56880]	gi|15607162|ref|NP_214534.1|	6
5	Rv0069c	SdaA	PROBABLE L-SERINE DEHYDRATASE SDAA (L-SERINE DEAMINASE) (SDH) (L-SD) [Mycobacterium tuberculosis H37Rv] [MASS=48576]	gi|15607211|ref|NP_214583.1|	5
6	Rv0096	PPE1	PPE FAMILY PROTEIN [Mycobacterium tuberculosis H37Rv] [MASS=46895]	gi|57116689|ref|YP_177690.1|	4
7	Rv0099	FadD10	acyl-CoA synthetase [Mycobacterium tuberculosis H37Rv] [MASS=56589]	gi|15607241|ref|NP_214613.1|	4
8	Rv0103c	CtpB	PROBABLE CATION-TRANSPORTER P-TYPE ATPASE B CTPB [Mycobacterium tuberculosis H37Rv] [MASS=77509]	gi|15607245|ref|NP_214617.1|	7
9	Rv0107c	CtpI	PROBABLE CATION-TRANSPORTER ATPASE I CTPI [Mycobacterium tuberculosis H37Rv] [MASS=169606]	gi|15607249|ref|NP_214621.1|	3
10	Rv0109	PE_PGRS1	PE-PGRS FAMILY PROTEIN [Mycobacterium tuberculosis H37Rv] [MASS=42288]	gi|57116691|ref|YP_177692.1|	3
11	Rv0117	OxyS	OXIDATIVE STRESS RESPONSE REGULATORY PROTEIN OXYS [Mycobacterium tuberculosis H37Rv] [MASS=34223]	gi|15607259|ref|NP_214631.1|	2
12	Rv0118c	OxcA	putative oxalyl-CoA decarboxylase [Mycobacterium tuberculosis H37Rv] [MASS=61171]	gi|15607260|ref|NP_214632.1|	4
13	Rv0124	PE_PGRS2	PE-PGRS FAMILY PROTEIN [Mycobacterium tuberculosis H37Rv] [MASS=40890]	gi|57116692|ref|YP_177693.1|	3
14	Rv0143c	Rv0143c	PROBABLE CONSERVED TRANSMEMBRANE PROTEIN [Mycobacterium tuberculosis H37Rv] [MASS=50808]	gi|15607285|ref|NP_214657.1|	7
15	Rv0157	PntB	PROBABLE NAD(P) TRANSHYDROGENASE (SUBUNIT BETA) PNTB [INTEGRAL MEMBRANE PROTEIN] (PYRIDINE NUCLEOTIDE TRANSHYDROGENASE SUBUNIT BETA) (NICOTINAMIDE NUCLEOTIDE TRANSHYDROGENASE SUBUNIT BETA) [Mycobacterium tuberculosis H37Rv] [MASS=48858]	gi|15607299|ref|NP_214671.1|	2
16	Rv0171	Mce1C	MCE-FAMILY PROTEIN MCE1C [Mycobacterium tuberculosis H37Rv] [MASS=53817]	gi|15607312|ref|NP_214685.1|	2
17	Rv0174	Mce1F	MCE-FAMILY PROTEIN MCE1F [Mycobacterium tuberculosis H37Rv] [MASS=54037]	gi|15607315|ref|NP_214688.1|	2
18	Rv0182c	SigG	RNA polymerase factor sigma-70 [Mycobacterium tuberculosis H37Rv] [MASS=40982]	gi|15607323|ref|NP_214696.1|	4
19	Rv0183	Rv0183	POSSIBLE LYSOPHOSPHOLIPASE [Mycobacterium tuberculosis H37Rv] [MASS=30261]	gi|57116702|ref|NP_214697.2|	2
20	Rv0199	Rv0199	PROBABLE CONSERVED MEMBRANE PROTEIN [Mycobacterium tuberculosis H37Rv] [MASS=23520]	gi|15607340|ref|NP_214713.1|	2
21	Rv0202	MmpL11	PROBABLE CONSERVED TRANSMEMBRANE TRANSPORT PROTEIN MMPL11 [Mycobacterium tuberculosis H37Rv] [MASS=103502]	gi|15607343|ref|NP_214716.1|	6
22	Rv0214	FadD4	acyl-CoA synthetase [Mycobacterium tuberculosis H37Rv] [MASS=58889]	gi|15607355|ref|NP_214728.1|	3
23	Rv0235c	Rv0235c	PROBABLE CONSERVED TRANSMEMBRANE PROTEIN [Mycobacterium tuberculosis H37Rv] [MASS=54837]	gi|15607376|ref|NP_214749.1|	2
24	Rv0236c	Rv0236c	PROBABLE CONSERVED TRANSMEMBRANE PROTEIN [Mycobacterium tuberculosis H37Rv] [MASS=146279]	gi|15607377|ref|NP_214750.1|	4
25	Rv0242c	FabG4	3-ketoacyl-(acyl-carrier-protein) reductase [Mycobacterium tuberculosis H37Rv] [MASS=46830]	gi|15607383|ref|NP_214756.1|	3
26	Rv0252	NirB	PROBABLE NITRITE REDUCTASE [NAD(P)H] LARGE SUBUNIT [FAD FLAVOPROTEIN] NIRB [Mycobacterium tuberculosis H37Rv] [MASS=90352]	gi|15607393|ref|NP_214766.1|	4
27	Rv0278c	PE_PGRS3	PE-PGRS FAMILY PROTEIN [Mycobacterium tuberculosis H37Rv] [MASS=81904]	gi|57116712|ref|YP_177707.1|	6
28	Rv0279c	PE_PGRS4	PE-PGRS FAMILY PROTEIN [Mycobacterium tuberculosis H37Rv] [MASS=68986]	gi|57116713|ref|YP_177708.1|	4
29	Rv0280	PPE3	PPE FAMILY PROTEIN [Mycobacterium tuberculosis H37Rv] [MASS=54707]	gi|57116714|ref|YP_177709.1|	6
30	Rv0284	Rv0284	POSSIBLE CONSERVED MEMBRANE PROTEIN [Mycobacterium tuberculosis H37Rv] [MASS=145169]	gi|15607425|ref|NP_214798.1|	4
31	Rv0297	PE_PGRS5	PE-PGRS FAMILY PROTEIN [Mycobacterium tuberculosis H37Rv] [MASS=49057]	gi|57116718|ref|YP_177713.1|	8
32	Rv0341	IniB	ISONIAZID INDUCTIBLE GENE PROTEIN INIB [Mycobacterium tuberculosis H37Rv] [MASS=43921]	gi|15607482|ref|NP_214855.1|	3
33	Rv0354c	PPE7	PPE FAMILY PROTEIN [Mycobacterium tuberculosis H37Rv] [MASS=14422]	gi|57116725|ref|YP_177720.1|	2
34	Rv0355c	PPE8	PPE FAMILY PROTEIN [Mycobacterium tuberculosis H37Rv] [MASS=327028]	gi|57116726|ref|YP_177721.1|	7
35	Rv0410c	PknG	SERINE/THREONINE-PROTEIN KINASE PKNG (PROTEIN KINASE G) (STPK G) [Mycobacterium tuberculosis H37Rv] [MASS=81577]	gi|15607551|ref|NP_214924.1|	2
36	Rv0413	MutT3	POSSIBLE MUTATOR PROTEIN MUTT3 (7,8-DIHYDRO-8-OXOGUANINE-TRIPHOSPHATASE) (8-OXO-DGTPASE) (DGTP PYROPHOSPHOHYDROLASE) [Mycobacterium tuberculosis H37Rv] [MASS=23499]	gi|15607554|ref|NP_214927.1|	2
37	Rv0425c	CtpH	POSSIBLE METAL CATION TRANSPORTING P-TYPE ATPASE CTPH [Mycobacterium tuberculosis H37Rv] [MASS=159772]	gi|15607566|ref|NP_214939.1|	7
38	Rv0435c	Rv0435c	PUTATIVE CONSERVED ATPASE [Mycobacterium tuberculosis H37Rv] [MASS=75346]	gi|15607576|ref|NP_214949.1|	2
39	Rv0442c	PPE10	PPE FAMILY PROTEIN [Mycobacterium tuberculosis H37Rv] [MASS=47246]	gi|57116731|ref|YP_177726.1|	3
40	Rv0479c	Rv0479c	PROBABLE CONSERVED MEMBRANE PROTEIN [Mycobacterium tuberculosis H37Rv] [MASS=37048]	gi|15607620|ref|NP_214993.1|	2
41	Rv0507	MmpL2	PROBABLE CONSERVED TRANSMEMBRANE TRANSPORT PROTEIN MMPL2 [Mycobacterium tuberculosis H37Rv] [MASS=106201]	gi|15607648|ref|NP_215021.1|	6
42	Rv0522	GabP	PROBABLE GABA PERMEASE GABP (4-AMINO BUTYRATE TRANSPORT CARRIER) (GAMA-AMINOBUTYRATE PERMEASE) [Mycobacterium tuberculosis H37Rv] [MASS=46030]	gi|57116749|ref|YP_177734.1|	4
43	Rv0533c	FabH	3-oxoacyl-(acyl carrier protein) synthase III [Mycobacterium tuberculosis H37Rv] [MASS=34872]	gi|15607673|ref|NP_215047.1|	3
44	Rv0545c	PitA	PROBABLE LOW-AFFINITY INORGANIC PHOSPHATE TRANSPORTER INTEGRAL MEMBRANE PROTEIN PITA [Mycobacterium tuberculosis H37Rv] [MASS=42745]	gi|15607685|ref|NP_215059.1|	2
45	Rv0551c	FadD8	acyl-CoA synthetase [Mycobacterium tuberculosis H37Rv] [MASS=61065]	gi|15607691|ref|NP_215065.1|	3
46	Rv0570	NrdZ	PROBABLE RIBONUCLEOSIDE-DIPHOSPHATE REDUCTASE (LARGE SUBUNIT) NRDZ (RIBONUCLEOTIDE REDUCTASE) [Mycobacterium tuberculosis H37Rv] [MASS=74521]	gi|15607710|ref|NP_215084.1|	2
47	Rv0582	Rv0582	hypothetical protein Rv0582 [Mycobacterium tuberculosis H37Rv] [MASS=14503]	gi|15607722|ref|NP_215096.1|	2
48	Rv0585c	Rv0585c	PROBABLE CONSERVED INTEGRAL MEMBRANE PROTEIN [Mycobacterium tuberculosis H37Rv] [MASS=84041]	gi|15607725|ref|NP_215099.1|	3
49	Rv0588	YrbE2B	CONSERVED HYPOTHETICAL INTEGRAL MEMBRANE PROTEIN YRBE2B [Mycobacterium tuberculosis H37Rv] [MASS=30968]	gi|15607728|ref|NP_215102.1|	3
50	Rv0591	Mce2C	MCE-FAMILY PROTEIN MCE2C [Mycobacterium tuberculosis H37Rv] [MASS=50764]	gi|15607731|ref|NP_215105.1|	4
51	Rv0625c	Rv0625c	PROBABLE CONSERVED TRANSMEMBRANE PROTEIN [Mycobacterium tuberculosis H37Rv] [MASS=25212]	gi|15607765|ref|NP_215139.1|	2
52	Rv0630c	RecB	PROBABLE EXONUCLEASE V (BETA CHAIN) RECB (EXODEOXYRIBONUCLEASE V BETA CHAIN)(EXODEOXYRIBONUCLEASE V POLYPEPTIDE) (CHI-SPECIFIC ENDONUCLEASE) [Mycobacterium tuberculosis H37Rv] [MASS=118721]	gi|15607770|ref|NP_215144.1|	3
53	Rv0650	Rv0650	POSSIBLE SUGAR KINASE [Mycobacterium tuberculosis H37Rv] [MASS=29270]	gi|15607790|ref|NP_215164.1|	2
54	Rv0663	AtsD	POSSIBLE ARYLSULFATASE ATSD (ARYL-SULFATE SULPHOHYDROLASE) (ARYLSULPHATASE) [Mycobacterium tuberculosis H37Rv] [MASS=86127]	gi|15607803|ref|NP_215177.1|	7
55	Rv0676c	MmpL5	PROBABLE CONSERVED TRANSMEMBRANE TRANSPORT PROTEIN MMPL5 [Mycobacterium tuberculosis H37Rv] [MASS=104784]	gi|15607816|ref|NP_215190.1|	4
56	Rv0679c	Rv0679c	CONSERVED HYPOTHETICAL THREONINE RICH PROTEIN [Mycobacterium tuberculosis H37Rv] [MASS=16586]	gi|15607819|ref|NP_215193.1|	2
57	Rv0694	LldD1	POSSIBLE L-LACTATE DEHYDROGENASE (CYTOCHROME) LLDD1 [Mycobacterium tuberculosis H37Rv] [MASS=42161]	gi|15607834|ref|NP_215208.1|	3
58	Rv0712	Rv0712	hypothetical protein Rv0712 [Mycobacterium tuberculosis H37Rv] [MASS=32744]	gi|15607852|ref|NP_215226.1|	2
59	Rv0724	SppA	POSSIBLE PROTEASE IV SPPA (ENDOPEPTIDASE IV) (SIGNAL PEPTIDE PEPTIDASE) [Mycobacterium tuberculosis H37Rv] [MASS=65935]	gi|15607864|ref|NP_215238.1|	5
60	Rv0746	PE_PGRS9	PE-PGRS FAMILY PROTEIN [Mycobacterium tuberculosis H37Rv] [MASS=64157]	gi|57116773|ref|YP_177750.1|	6
61	Rv0747	PE_PGRS10	PE-PGRS FAMILY PROTEIN [Mycobacterium tuberculosis H37Rv] [MASS=65406]	gi|57116774|ref|YP_177751.1|	7
62	Rv0754	PE_PGRS11	PE-PGRS FAMILY PROTEIN [Mycobacterium tuberculosis H37Rv] [MASS=56945]	gi|57116776|ref|YP_177752.1|	8
63	Rv0755c	PPE12	PPE FAMILY PROTEIN [Mycobacterium tuberculosis H37Rv] [MASS=62692]	gi|57116777|ref|YP_177753.1|	4
64	Rv0770	Rv0770	PROBABLE DEHYDROGENASE/REDUCTASE [Mycobacterium tuberculosis H37Rv] [MASS=30446]	gi|15607910|ref|NP_215284.1|	3
65	Rv0773c	GgtA	PROBABLE BIFUNCTIONAL ACYLASE GGTA: CEPHALOSPORIN ACYLASE (GL-7ACA ACYLASE) + GAMMA-GLUTAMYLTRANSPEPTIDASE (GGT) [Mycobacterium tuberculosis H37Rv] [MASS=54593]	gi|15607913|ref|NP_215287.1|	3
66	Rv0783c	EmrB	POSSIBLE MULTIDRUG RESISTANCE INTEGRAL MEMBRANE EFFLUX PROTEIN EMRB [Mycobacterium tuberculosis H37Rv] [MASS=56587]	gi|15607923|ref|NP_215297.1|	5
67	Rv0834c	PE_PGRS14	PE-PGRS FAMILY PROTEIN [Mycobacterium tuberculosis H37Rv] [MASS=71698]	gi|57116789|ref|YP_177761.1|	6
68	Rv0852	FadD16	POSSIBLE FATTY-ACID-CoA LIGASE FADD16 (FATTY-ACID-CoA SYNTHETASE) (FATTY-ACID-CoA SYNTHASE) [Mycobacterium tuberculosis H37Rv] [MASS=30108]	gi|15607992|ref|NP_215367.1|	4
69	Rv0853c	Pdc	PROBABLE PYRUVATE OR INDOLE-3-PYRUVATE DECARBOXYLASE PDC [MASS=59783]	gi|15607993|ref|NP_215368.1|	4
70	Rv0860	FadB	PROBABLE FATTY OXIDATION PROTEIN FADB [Mycobacterium tuberculosis H37Rv] [MASS=76104]	gi|15608000|ref|NP_215375.1|	4
71	Rv0867c	RpfA	POSSIBLE RESUSCITATION-PROMOTING FACTOR RPFA [Mycobacterium tuberculosis H37Rv] [MASS=39974]	gi|15608007|ref|NP_215382.1|	4
72	Rv0872c	PE_PGRS15	PE-PGRS FAMILY PROTEIN [Mycobacterium tuberculosis H37Rv] [MASS=50267]	gi|57116793|ref|YP_177763.1|	10
73	Rv0886	FprB	PROBABLE NADPH:ADRENODOXIN OXIDOREDUCTASE FPRB (ADRENODOXIN REDUCTASE) (AR) (FERREDOXIN-NADP(+) REDUCTASE) [Mycobacterium tuberculosis H37Rv] [MASS=61337]	gi|15608026|ref|NP_215401.1|	2
74	Rv0890c	Rv0890c	PROBABLE TRANSCRIPTIONAL REGULATORY PROTEIN (PROBABLY LUXR-FAMILY) [Mycobacterium tuberculosis H37Rv] [MASS=94496]	gi|15608030|ref|NP_215405.1|	6
75	Rv0892	Rv0892	PROBABLE MONOOXYGENASE [Mycobacterium tuberculosis H37Rv] [MASS=55039]	gi|15608032|ref|NP_215407.1|	2
76	Rv0928	PstS3	PERIPLASMIC PHOSPHATE-BINDING LIPOPROTEIN PSTS3 (PBP-3) (PSTS3) (PHOS1) [Mycobacterium tuberculosis H37Rv] [MASS=37953]	gi|57116798|ref|YP_177768.1|	2
77	Rv0934	PstS1	PERIPLASMIC PHOSPHATE-BINDING LIPOPROTEIN PSTS1 (PBP-1) (PSTS1) [Mycobacterium tuberculosis H37Rv] [MASS=38243]	gi|57116801|ref|YP_177770.1|	4
78	Rv0939	Rv0939	POSSIBLE BIFUNCTIONAL ENZYME: 2-HYDROXYHEPTA-2,4-DIENE-1,7-DIOATE ISOMERASE (HHDD ISOMERASE) + CYCLASE/DEHYDRASE [Mycobacterium tuberculosis H37Rv] [MASS=69353]	gi|15608079|ref|NP_215454.1|	4
79	Rv0940c	Rv0940c	POSSIBLE OXIDOREDUCTASE [Mycobacterium tuberculosis H37Rv] [MASS=31788]	gi|15608080|ref|NP_215455.1|	3
80	Rv0952	SucD	succinyl-CoA synthetase subunit alpha [Mycobacterium tuberculosis H37Rv] [MASS=31229]	gi|15608092|ref|NP_215467.1|	3
81	Rv0957	PurH	bifunctional phosphoribosylaminoimidazolecarboxamide formyltransferase/IMP cyclohydrolase [Mycobacterium tuberculosis H37Rv] [MASS=55026]	gi|15608097|ref|NP_215472.1|	4
82	Rv0969	CtpV	PROBABLE METAL CATION TRANSPORTER P-TYPE ATPASE CTPV [Mycobacterium tuberculosis H37Rv] [MASS=80102]	gi|15608109|ref|NP_215484.1|	2
83	Rv0974c	AccD2	PROBABLE ACETYL-/PROPIONYL-CoA CARBOXYLASE (BETA SUBUNIT) ACCD2 [Mycobacterium tuberculosis H37Rv] [MASS=56256]	gi|15608114|ref|NP_215489.1|	3
84	Rv0978c	PE_PGRS17	PE-PGRS FAMILY PROTEIN [Mycobacterium tuberculosis H37Rv] [MASS=31019]	gi|57116806|ref|YP_177774.1|	3
85	Rv0982	MprB	PROBABLE TWO COMPONENT SENSOR KINASE MPRB [Mycobacterium tuberculosis H37Rv] [MASS=54407]	gi|15608122|ref|NP_215497.1|	2
86	Rv0994	MoeA1	PROBABLE MOLYBDOPTERIN BIOSYNTHESIS PROTEIN MOEA1 [Mycobacterium tuberculosis H37Rv] [MASS=44337]	gi|57116810|ref|YP_177776.1|	3
87	Rv1018c	GlmU	Probable UDP-N-acetylglucosamine pyrophosphorylase glmU [Mycobacterium tuberculosis H37Rv] [MASS=51584]	gi|15608158|ref|NP_215534.1|	3
88	Rv1026	Rv1026	hypothetical protein Rv1026 [Mycobacterium tuberculosis H37Rv] [MASS=33663]	gi|15608166|ref|NP_215542.1|	2
89	Rv1039c	PPE15	PPE FAMILY PROTEIN [Mycobacterium tuberculosis H37Rv] [MASS=38081]	gi|57116813|ref|YP_177778.1|	5
90	Rv1057	Rv1057	hypothetical protein Rv1057 [Mycobacterium tuberculosis H37Rv] [MASS=40710]	gi|15608197|ref|NP_215573.1|	4
91	Rv1067c	PE_PGRS19	PE-PGRS FAMILY PROTEIN [Mycobacterium tuberculosis H37Rv] [MASS=54724]	gi|57116818|ref|YP_177780.1|	6
92	Rv1069c	Rv1069c	hypothetical protein Rv1069c [Mycobacterium tuberculosis H37Rv] [MASS=64341]	gi|15608209|ref|NP_215585.1|	5
93	Rv1084	Rv1084	hypothetical protein Rv1084 [Mycobacterium tuberculosis H37Rv] [MASS=71050]	gi|15608224|ref|NP_215600.1|	2
94	Rv1087	PE_PGRS21	PE-PGRS FAMILY PROTEIN [Mycobacterium tuberculosis H37Rv] [MASS=62469]	gi|57116821|ref|YP_177783.1|	5
95	Rv1088	PE9	PE FAMILY PROTEIN [Mycobacterium tuberculosis H37Rv] [MASS=15376]	gi|57116823|ref|YP_177784.1|	3
96	Rv1091	PE_PGRS22	PE-PGRS FAMILY PROTEIN [Mycobacterium tuberculosis H37Rv] [MASS=68316]	gi|57116826|ref|YP_177786.1|	4
97	Rv1097c	Rv1097c	PROBABLE MEMBRANE GLYCINE AND PROLINE RICH PROTEIN [Mycobacterium tuberculosis H37Rv] [MASS=29873]	gi|15608237|ref|NP_215613.1|	4
98	Rv1101c	Rv1101c	hypothetical protein Rv1101c [Mycobacterium tuberculosis H37Rv] [MASS=41716]	gi|15608241|ref|NP_215617.1|	4
99	Rv1106c	Rv1106c	PROBABLE CHOLESTEROL DEHYDROGENASE [Mycobacterium tuberculosis H37Rv] [MASS=40741]	gi|15608246|ref|NP_215622.1|	3
100	Rv1132	Rv1132	hypothetical protein Rv1132 [Mycobacterium tuberculosis H37Rv] [MASS=64019]	gi|15608272|ref|NP_215648.1|	3
101	Rv1147	Rv1147	hypothetical protein Rv1147 [Mycobacterium tuberculosis H37Rv] [MASS=23405]	gi|15608287|ref|NP_215663.1|	2
102	Rv1151c	Rv1151c	NAD-dependent deacetylase [Mycobacterium tuberculosis H37Rv] [MASS=25661]	gi|15608291|ref|NP_215667.1|	4
103	Rv1157c	Rv1157c	CONSERVED HYPOTHETICAL ALA-, PRO-RICH PROTEIN [Mycobacterium tuberculosis H37Rv] [MASS=36480]	gi|15608297|ref|NP_215673.1|	4
104	Rv1161	NarG	PROBABLE RESPIRATORY NITRATE REDUCTASE (ALPHA CHAIN) NARG [Mycobacterium tuberculosis H37Rv] [MASS=136955]	gi|15608301|ref|NP_215677.1|	7
105	Rv1162	NarH	PROBABLE RESPIRATORY NITRATE REDUCTASE (BETA CHAIN) NARH [Mycobacterium tuberculosis H37Rv] [MASS=62037]	gi|15608302|ref|NP_215678.1|	5
106	Rv1166	LpqW	PROBABLE CONSERVED LIPOPROTEIN LPQW [Mycobacterium tuberculosis H37Rv] [MASS=66130]	gi|15608306|ref|NP_215682.1|	5
107	Rv1181	Pks4	PROBABLE POLYKETIDE BETA-KETOACYL SYNTHASE PKS4 [Mycobacterium tuberculosis H37Rv] [MASS=168115]	gi|15608321|ref|NP_215697.1|	5
108	Rv1182	PapA3	PROBABLE CONSERVED POLYKETIDE SYNTHASE ASSOCIATED PROTEIN PAPA3 [Mycobacterium tuberculosis H37Rv] [MASS=51575]	gi|15608322|ref|NP_215698.1|	4
109	Rv1196	PPE18	PPE FAMILY PROTEIN [Mycobacterium tuberculosis H37Rv] [MASS=39158]	gi|57116841|ref|YP_177795.1|	9
110	Rv1214c	PE14	PE FAMILY PROTEIN [Mycobacterium tuberculosis H37Rv] [MASS=10846]	gi|57116843|ref|YP_177797.1|	2
111	Rv1223	HtrA	PROBABLE SERINE PROTEASE HTRA (DEGP PROTEIN) [Mycobacterium tuberculosis H37Rv] [MASS=54189]	gi|57116844|ref|NP_215739.2|	3
112	Rv1230c	Rv1230c	POSSIBLE MEMBRANE PROTEIN [Mycobacterium tuberculosis H37Rv] [MASS=41417]	gi|15608370|ref|NP_215746.1|	5
113	Rv1235	LpqY	PROBABLE SUGAR-BINDING LIPOPROTEIN LPQY [Mycobacterium tuberculosis H37Rv] [MASS=49793]	gi|15608375|ref|NP_215751.1|	2
114	Rv1251c	Rv1251c	hypothetical protein Rv1251c [Mycobacterium tuberculosis H37Rv] [MASS=123148]	gi|15608391|ref|NP_215767.1|	3
115	Rv1259	Rv1259	hypothetical protein Rv1259 [Mycobacterium tuberculosis H37Rv] [MASS=31783]	gi|15608399|ref|NP_215775.1|	2
116	Rv1266c	PknH	PROBABLE TRANSMEMBRANE SERINE/THREONINE-PROTEIN KINASE H PKNH (PROTEIN KINASE H) (STPK H) [Mycobacterium tuberculosis H37Rv] [MASS=66753]	gi|15608406|ref|NP_215782.1|	6
117	Rv1275	LprC	POSSIBLE LIPOPROTEIN LPRC [Mycobacterium tuberculosis H37Rv] [MASS=18871]	gi|15608415|ref|NP_215791.1|	4
118	Rv1325c	PE_PGRS24	PE-PGRS FAMILY PROTEIN [Mycobacterium tuberculosis H37Rv] [MASS=49574]	gi|57116848|ref|YP_177799.1|	7
119	Rv1337	Rv1337	PROBABLE INTEGRAL MEMBRANE PROTEIN [Mycobacterium tuberculosis H37Rv] [MASS=25702]	gi|15608477|ref|NP_215853.1|	2
120	Rv1349	Rv1349	PROBABLE DRUGS-TRANSPORT TRANSMEMBRANE ATP-BINDING PROTEIN ABC TRANSPORTER [Mycobacterium tuberculosis H37Rv] [MASS=60954]	gi|15608489|ref|NP_215865.1|	2
121	Rv1354c	Rv1354c	hypothetical protein Rv1354c [Mycobacterium tuberculosis H37Rv] [MASS=67653]	gi|15608494|ref|NP_215870.1|	2
122	Rv1360	Rv1360	PROBABLE OXIDOREDUCTASE [Mycobacterium tuberculosis H37Rv] [MASS=37252]	gi|15608500|ref|NP_215876.1|	6
123	Rv1361c	PPE19	PPE FAMILY PROTEIN [Mycobacterium tuberculosis H37Rv] [MASS=40015]	gi|57116852|ref|YP_177801.1|	6
124	Rv1362c	Rv1362c	POSSIBLE MEMBRANE PROTEIN [Mycobacterium tuberculosis H37Rv] [MASS=23503]	gi|15608502|ref|NP_215878.1|	3
125	Rv1384	CarB	carbamoyl phosphate synthase large subunit [Mycobacterium tuberculosis H37Rv] [MASS=118960]	gi|57116856|ref|YP_177804.1|	5
126	Rv1437	Pgk	phosphoglycerate kinase [Mycobacterium tuberculosis H37Rv] [MASS=42512]	gi|15608575|ref|NP_215953.1|	2
127	Rv1454c	Qor	PROBABLE QUINONE REDUCTASE QOR (NADPH:quinone reductase) (Zeta-crystallin homolog protein) [Mycobacterium tuberculosis H37Rv] [MASS=34046]	gi|15608592|ref|NP_215970.1|	4
128	Rv1468c	PE_PGRS29	PE-PGRS FAMILY PROTEIN [Mycobacterium tuberculosis H37Rv] [MASS=32215]	gi|57116869|ref|YP_177814.1|	2
129	Rv1484	InhA	enoyl-(acyl carrier protein) reductase [Mycobacterium tuberculosis H37Rv] [MASS=28528]	gi|15608622|ref|NP_216000.1|	3
130	Rv1493	MutB	methylmalonyl-CoA mutase [Mycobacterium tuberculosis H37Rv] [MASS=80604]	gi|15608631|ref|NP_216009.1|	4
131	Rv1514c	Rv1514c	hypothetical protein Rv1514c [Mycobacterium tuberculosis H37Rv] [MASS=28965]	gi|15608652|ref|NP_216030.1|	4
132	Rv1522c	MmpL12	PROBABLE CONSERVED TRANSMEMBRANE TRANSPORT PROTEIN MMPL12 [Mycobacterium tuberculosis H37Rv] [MASS=122429]	gi|15608660|ref|NP_216038.1|	3
133	Rv1523	Rv1523	Probable methyltransferase [Mycobacterium tuberculosis H37Rv] [MASS=37915]	gi|15608661|ref|NP_216039.1|	3
134	Rv1524	Rv1524	Probable glycosyltransferase [Mycobacterium tuberculosis H37Rv] [MASS=44362]	gi|15608662|ref|NP_216040.1|	5
135	Rv1527c	Pks5	Probable polyketide synthase pks5 [Mycobacterium tuberculosis H37Rv] [MASS=223887]	gi|15608665|ref|NP_216043.1|	2
136	Rv1565c	Rv1565c	hypothetical protein Rv1565c [Mycobacterium tuberculosis H37Rv] [MASS=80162]	gi|15608703|ref|NP_216081.1|	3
137	Rv1567c	Rv1567c	Probable hypothetical membrane protein [Mycobacterium tuberculosis H37Rv] [MASS=10362]	gi|15608705|ref|NP_216083.1|	2
138	Rv1570	BioD	dithiobiotin synthetase [Mycobacterium tuberculosis H37Rv] [MASS=22456]	gi|15608708|ref|NP_216086.1|	2
139	Rv1613	TrpA	tryptophan synthase subunit alpha [Mycobacterium tuberculosis H37Rv] [MASS=27727]	gi|15608751|ref|NP_216129.1|	2
140	Rv1625c	Cya	MEMBRANE-ANCHORED ADENYLYL CYCLASE CYA (ATP PYROPHOSPHATE-LYASE) (ADENYLATE CYCLASE) [Mycobacterium tuberculosis H37Rv] [MASS=47369]	gi|57116894|ref|NP_216141.2|	3
141	Rv1639c	Rv1639c	hypothetical protein Rv1639c [Mycobacterium tuberculosis H37Rv] [MASS=51791]	gi|15608777|ref|NP_216155.1|	5
142	Rv1651c	PE_PGRS30	PE-PGRS FAMILY PROTEIN [Mycobacterium tuberculosis H37Rv] [MASS=88454]	gi|57116897|ref|YP_177826.1|	3
143	Rv1661	Pks7	Probable polyketide synthase pks7 [Mycobacterium tuberculosis H37Rv] [MASS=221045]	gi|15608799|ref|NP_216177.1|	2
144	Rv1663	Pks17	Probable polyketide synthase pks17 [Mycobacterium tuberculosis H37Rv] [MASS=53524]	gi|15608801|ref|NP_216179.1|	3
145	Rv1679	FadE16	POSSIBLE ACYL-CoA DEHYDROGENASE FADE16 [Mycobacterium tuberculosis H37Rv] [MASS=37876]	gi|15608817|ref|NP_216195.1|	3
146	Rv1706c	PPE23	PPE FAMILY PROTEIN [Mycobacterium tuberculosis H37Rv] [MASS=39778]	gi|57116899|ref|YP_177828.1|	5
147	Rv1723	Rv1723	PROBABLE HYDROLASE [Mycobacterium tuberculosis H37Rv] [MASS=43630]	gi|15608861|ref|NP_216239.1|	5
148	Rv1736	NarX	PROBABLE NITRATE REDUCTASE NARX [Mycobacterium tuberculosis H37Rv] [MASS=72825]	gi|15608874|ref|NP_216252.1|	5
149	Rv1737c	NarK2	POSSIBLE NITRATE/NITRITE TRANSPORTER NARK2 [Mycobacterium tuberculosis H37Rv] [MASS=41109]	gi|15608875|ref|NP_216253.1|	5
150	Rv1746	PknF	ANCHORED-MEMBRANE SERINE/THREONINE-PROTEIN KINASE PKNF (PROTEIN KINASE F) (STPK F) [Mycobacterium tuberculosis H37Rv] [MASS=50668]	gi|15608884|ref|NP_216262.1|	2
151	Rv1753c	PPE24	PPE FAMILY PROTEIN [Mycobacterium tuberculosis H37Rv] [MASS=104649]	gi|57116904|ref|YP_177830.1|	5
152	Rv1758	Cut1	PROBABLE CUTINASE CUT1 [Mycobacterium tuberculosis H37Rv] [MASS=17868]	gi|15608896|ref|NP_216274.1|	4
153	Rv1759c	Wag22	PE-PGRS FAMILY PROTEIN [Mycobacterium tuberculosis H37Rv] [MASS=74353]	gi|57116905|ref|YP_177831.1|	9
154	Rv1768	PE_PGRS31	PE-PGRS FAMILY PROTEIN [Mycobacterium tuberculosis H37Rv] [MASS=51962]	gi|57116908|ref|YP_177832.1|	4
155	Rv1784	Rv1784	hypothetical protein Rv1784 [Mycobacterium tuberculosis H37Rv] [MASS=101467]	gi|15608922|ref|NP_216300.1|	4
156	Rv1790	PPE27	PPE FAMILY PROTEIN [Mycobacterium tuberculosis H37Rv] [MASS=35459]	gi|57116912|ref|YP_177836.1|	6
157	Rv1795	Rv1795	hypothetical protein Rv1795 [Mycobacterium tuberculosis H37Rv] [MASS=53435]	gi|15608932|ref|NP_216311.1|	4
158	Rv1798	Rv1798	hypothetical protein Rv1798 [Mycobacterium tuberculosis H37Rv] [MASS=67756]	gi|15608935|ref|NP_216314.1|	2
159	Rv1802	PPE30	PPE FAMILY PROTEIN [Mycobacterium tuberculosis H37Rv] [MASS=46021]	gi|57116917|ref|YP_177841.1|	5
160	Rv1803c	PE_PGRS32	PE-PGRS FAMILY PROTEIN [Mycobacterium tuberculosis H37Rv] [MASS=54881]	gi|57116918|ref|YP_177842.1|	5
161	Rv1809	PPE33	PPE FAMILY PROTEIN [Mycobacterium tuberculosis H37Rv] [MASS=47156]	gi|57116922|ref|YP_177845.1|	3
162	Rv1832	GcvB	glycine dehydrogenase [Mycobacterium tuberculosis H37Rv] [MASS=99510]	gi|15608969|ref|NP_216348.1|	3
163	Rv1836c	Rv1836c	hypothetical protein Rv1836c [Mycobacterium tuberculosis H37Rv] [MASS=69676]	gi|15608973|ref|NP_216352.1|	3
164	Rv1837c	GlcB	malate synthase G [Mycobacterium tuberculosis H37Rv] [MASS=80402]	gi|15608974|ref|NP_216353.1|	2
165	Rv1844c	Gnd1	6-phosphogluconate dehydrogenase [Mycobacterium tuberculosis H37Rv] [MASS=51547]	gi|57116925|ref|YP_177848.1|	2
166	Rv1857	ModA	PROBABLE MOLYBDATE-BINDING LIPOPROTEIN MODA [Mycobacterium tuberculosis H37Rv] [MASS=26576]	gi|15608994|ref|NP_216373.1|	3
167	Rv1867	Rv1867	acetyl-CoA acetyltransferase [Mycobacterium tuberculosis H37Rv] [MASS=53560]	gi|15609004|ref|NP_216383.1|	2
168	Rv1878	GlnA3	PROBABLE GLUTAMINE SYNTHETASE GLNA3 (GLUTAMINE SYNTHASE) (GS-I) [Mycobacterium tuberculosis H37Rv] [MASS=46720]	gi|15609015|ref|NP_216394.1|	3
169	Rv1891	Rv1891	hypothetical protein Rv1891 [Mycobacterium tuberculosis H37Rv] [MASS=14109]	gi|15609028|ref|NP_216407.1|	5
170	Rv1899c	LppD	POSSIBLE LIPOPROTEIN LPPD [Mycobacterium tuberculosis H37Rv] [MASS=35072]	gi|15609036|ref|NP_216415.1|	2
171	Rv1917c	PPE34	PPE FAMILY PROTEIN [Mycobacterium tuberculosis H37Rv] [MASS=142943]	gi|57116928|ref|YP_177655.1|	9
172	Rv1918c	PPE35	PPE FAMILY PROTEIN [Mycobacterium tuberculosis H37Rv] [MASS=97950]	gi|57116929|ref|YP_177850.1|	4
173	Rv1938	EphB	PROBABLE EPOXIDE HYDROLASE EPHB (EPOXIDE HYDRATASE) [Mycobacterium tuberculosis H37Rv] [MASS=39297]	gi|15609075|ref|NP_216454.1|	3
174	Rv1944c	Rv1944c	hypothetical protein Rv1944c [Mycobacterium tuberculosis H37Rv] [MASS=20795]	gi|15609081|ref|NP_216460.1|	2
175	Rv1965	YrbE3B	CONSERVED HYPOTHETICAL INTEGRAL MEMBRANE PROTEIN YRBE3B [Mycobacterium tuberculosis H37Rv] [MASS=28144]	gi|15609102|ref|NP_216481.1|	4
176	Rv1983	PE_PGRS35	PE-PGRS FAMILY PROTEIN [Mycobacterium tuberculosis H37Rv] [MASS=53737]	gi|57116933|ref|YP_177854.1|	2
177	Rv1985c	Rv1985c	chromosome replication initiation inhibitor protein [Mycobacterium tuberculosis H37Rv] [MASS=32837]	gi|15609122|ref|NP_216501.1|	2
178	Rv1992c	CtpG	PROBABLE METAL CATION TRANSPORTER P-TYPE ATPASE G CTPG [Mycobacterium tuberculosis H37Rv] [MASS=79309]	gi|15609129|ref|NP_216508.1|	4
179	Rv1997	CtpF	PROBABLE METAL CATION TRANSPORTER P-TYPE ATPASE A CTPF [Mycobacterium tuberculosis H37Rv] [MASS=95032]	gi|15609134|ref|NP_216513.1|	2
180	Rv2007c	FdxA	PROBABLE FERREDOXIN FDXA [Mycobacterium tuberculosis H37Rv] [MASS=12064]	gi|15609144|ref|NP_216523.1|	2
181	Rv2008c	Rv2008c	hypothetical protein Rv2008c [Mycobacterium tuberculosis H37Rv] [MASS=48392]	gi|15609145|ref|NP_216524.1|	2
182	Rv2046	LppI	Probable lipoprotein lppI [Mycobacterium tuberculosis H37Rv] [MASS=22202]	gi|15609183|ref|NP_216562.1|	2
183	Rv2047c	Rv2047c	hypothetical protein Rv2047c [Mycobacterium tuberculosis H37Rv] [MASS=91384]	gi|15609184|ref|NP_216563.1|	2
184	Rv2079	Rv2079	hypothetical protein Rv2079 [Mycobacterium tuberculosis H37Rv] [MASS=69823]	gi|15609216|ref|NP_216595.1|	3
185	Rv2082	Rv2082	hypothetical protein Rv2082 [Mycobacterium tuberculosis H37Rv] [MASS=73564]	gi|15609219|ref|NP_216598.1|	3
186	Rv2083	Rv2083	hypothetical protein Rv2083 [Mycobacterium tuberculosis H37Rv] [MASS=30773]	gi|15609220|ref|NP_216599.1|	2
187	Rv2126c	PE_PGRS37	PE-PGRS FAMILY PROTEIN [Mycobacterium tuberculosis H37Rv] [MASS=20324]	gi|57116949|ref|YP_177862.1|	3
188	Rv2153c	MurG	N-acetylglucosaminyl transferase [MASS=41860]	gi|15609290|ref|NP_216669.1|	3
189	Rv2162c	PE_PGRS38	PE-PGRS FAMILY PROTEIN [Mycobacterium tuberculosis H37Rv] [MASS=44478]	gi|57116953|ref|YP_177865.1|	3
190	Rv2163c	PbpB	Probable penicillin-binding membrane protein pbpB [Mycobacterium tuberculosis H37Rv] [MASS=72536]	gi|15609300|ref|NP_216679.1|	3
191	Rv2239c	Rv2239c	hypothetical protein Rv2239c [Mycobacterium tuberculosis H37Rv] [MASS=16963]	gi|15609376|ref|NP_216755.1|	3
192	Rv2244	AcpM	acyl carrier protein [Mycobacterium tuberculosis H37Rv] [MASS=12524]	gi|15609381|ref|NP_216760.1|	4
193	Rv2245	KasA	3-oxoacyl-(acyl carrier protein) synthase II [Mycobacterium tuberculosis H37Rv] [MASS=43316]	gi|15609382|ref|NP_216761.1|	4
194	Rv2246	KasB	3-oxoacyl-(acyl carrier protein) synthase II [Mycobacterium tuberculosis H37Rv] [MASS=46420]	gi|15609383|ref|NP_216762.1|	3
195	Rv2247	AccD6	ACETYL/PROPIONYL-CoA CARBOXYLASE (BETA SUBUNIT) ACCD6 [Mycobacterium tuberculosis H37Rv] [MASS=50136]	gi|15609384|ref|NP_216763.1|	3
196	Rv2293c	Rv2293c	hypothetical protein Rv2293c [Mycobacterium tuberculosis H37Rv] [MASS=25255]	gi|15609430|ref|NP_216809.1|	4
197	Rv2301	Cut2	PROBABLE CUTINASE CUT2 [Mycobacterium tuberculosis H37Rv] [MASS=23926]	gi|57116961|ref|NP_216817.2|	4
198	Rv2314c	Rv2314c	hypothetical protein Rv2314c [Mycobacterium tuberculosis H37Rv] [MASS=48712]	gi|15609451|ref|NP_216830.1|	2
199	Rv2315c	Rv2315c	hypothetical protein Rv2315c [Mycobacterium tuberculosis H37Rv] [MASS=54578]	gi|15609452|ref|NP_216831.1|	3
200	Rv2326c	Rv2326c	POSSIBLE TRANSMEMBRANE ATP-BINDING PROTEIN ABC TRANSORTER [Mycobacterium tuberculosis H37Rv] [MASS=72835]	gi|15609463|ref|NP_216842.1|	3
201	Rv2328	PE23	PE FAMILY PROTEIN [Mycobacterium tuberculosis H37Rv] [MASS=36832]	gi|57116969|ref|YP_177867.1|	3
202	Rv2333c	Rv2333c	PROBABLE CONSERVED INTEGRAL MEMBRANE TRANSPORT PROTEIN [Mycobacterium tuberculosis H37Rv] [MASS=57115]	gi|15609470|ref|NP_216849.1|	4
203	Rv2340c	PE_PGRS39	PE-PGRS FAMILY PROTEIN [Mycobacterium tuberculosis H37Rv] [MASS=38722]	gi|57116973|ref|YP_177869.1|	4
204	Rv2349c	PlcC	PROBABLE PHOSPHOLIPASE C 3 PLCC [Mycobacterium tuberculosis H37Rv] [MASS=55047]	gi|15609486|ref|NP_216865.1|	2
205	Rv2351c	PlcA	PROBABLE MEMBRANE-ASSOCIATED PHOSPHOLIPASE C 1 PLCA (MTP40 ANTIGEN) [Mycobacterium tuberculosis H37Rv] [MASS=55381]	gi|15609488|ref|NP_216867.1|	3
206	Rv2352c	PPE38	PPE FAMILY PROTEIN [Mycobacterium tuberculosis H37Rv] [MASS=37355]	gi|57116974|ref|YP_177870.1|	9
207	Rv2376c	Cfp2	LOW MOLECULAR WEIGHT ANTIGEN CFP2 (LOW MOLECULAR WEIGHT PROTEIN ANTIGEN 2) (CFP-2) [Mycobacterium tuberculosis H37Rv] [MASS=16635]	gi|15609513|ref|NP_216892.1|	3
208	Rv2381c	MbtD	POLYKETIDE SYNTHETASE MBTD (POLYKETIDE SYNTHASE) [Mycobacterium tuberculosis H37Rv] [MASS=105591]	gi|15609518|ref|NP_216897.1|	7
209	Rv2383c	MbtB	PHENYLOXAZOLINE SYNTHASE MBTB (PHENYLOXAZOLINE SYNTHETASE) [Mycobacterium tuberculosis H37Rv] [MASS=151633]	gi|15609520|ref|NP_216899.1|	2
210	Rv2384	MbtA	BIFUNCTIONAL ENZYME MBTA: SALICYL-AMP LIGASE (SAL-AMP LIGASE) + SALICYL-S-ArCP SYNTHETASE [Mycobacterium tuberculosis H37Rv] [MASS=59280]	gi|15609521|ref|NP_216900.1|	4
211	Rv2437	Rv2437	hypothetical protein Rv2437 [Mycobacterium tuberculosis H37Rv] [MASS=15315]	gi|15609574|ref|NP_216953.1|	3
212	Rv2447c	FolC	PROBABLE FOLYLPOLYGLUTAMATE SYNTHASE PROTEIN FOLC (FOLYLPOLY-GAMMA-GLUTAMATE SYNTHETASE) (FPGS) [Mycobacterium tuberculosis H37Rv] [MASS=50779]	gi|15609584|ref|NP_216963.1|	3
213	Rv2448c	ValS	valyl-tRNA synthetase [Mycobacterium tuberculosis H37Rv] [MASS=97820]	gi|15609585|ref|NP_216964.1|	3
214	Rv2461c	ClpP1	ATP-dependent Clp protease proteolytic subunit [Mycobacterium tuberculosis H37Rv] [MASS=21708]	gi|57116992|ref|YP_177883.1|	5
215	Rv2487c	PE_PGRS42	PE-PGRS FAMILY PROTEIN [Mycobacterium tuberculosis H37Rv] [MASS=57217]	gi|57116995|ref|YP_177886.1|	10
216	Rv2488c	Rv2488c	PROBABLE TRANSCRIPTIONAL REGULATORY PROTEIN (LUXR-FAMILY) [Mycobacterium tuberculosis H37Rv] [MASS=120817]	gi|15609625|ref|NP_217004.1|	2
217	Rv2490c	PE_PGRS43	PE-PGRS FAMILY PROTEIN [Mycobacterium tuberculosis H37Rv] [MASS=133123]	gi|57116996|ref|YP_177887.1|	13
218	Rv2522c	Rv2522c	hypothetical protein Rv2522c [Mycobacterium tuberculosis H37Rv] [MASS=49325]	gi|15609659|ref|NP_217038.1|	4
219	Rv2542	Rv2542	hypothetical protein Rv2542 [Mycobacterium tuberculosis H37Rv] [MASS=42480]	gi|15609679|ref|NP_217058.1|	4
220	Rv2566	Rv2566	LONG CONSERVED HYPOTHETICAL PROTEIN [Mycobacterium tuberculosis H37Rv] [MASS=124535]	gi|15609703|ref|NP_217082.1|	5
221	Rv2567	Rv2567	CONSERVED HYPOTHETICAL ALANINE AND LEUCINE RICH PROTEIN [Mycobacterium tuberculosis H37Rv] [MASS=95448]	gi|15609704|ref|NP_217083.1|	2
222	Rv2589	GabT	4-aminobutyrate aminotransferase [Mycobacterium tuberculosis H37Rv] [MASS=46812]	gi|15609726|ref|NP_217105.1|	2
223	Rv2597	Rv2597	PROBABLE MEMBRANE PROTEIN [Mycobacterium tuberculosis H37Rv] [MASS=21943]	gi|15609734|ref|NP_217113.1|	2
224	Rv2627c	Rv2627c	hypothetical protein Rv2627c [Mycobacterium tuberculosis H37Rv] [MASS=46252]	gi|15609764|ref|NP_217143.1|	2
225	Rv2631	Rv2631	hypothetical protein Rv2631 [Mycobacterium tuberculosis H37Rv] [MASS=45528]	gi|57117009|ref|NP_217147.2|	2
226	Rv2634c	PE_PGRS46	PE-PGRS FAMILY PROTEIN [Mycobacterium tuberculosis H37Rv] [MASS=63130]	gi|57117010|ref|YP_177896.1|	9
227	Rv2643	ArsC	PROBABLE ARSENIC-TRANSPORT INTEGRAL MEMBRANE PROTEIN ARSC [Mycobacterium tuberculosis H37Rv] [MASS=53225]	gi|15609780|ref|NP_217159.1|	2
228	Rv2661c	Rv2661c	hypothetical protein Rv2661c [Mycobacterium tuberculosis H37Rv] [MASS=13700]	gi|15609798|ref|NP_217177.1|	3
229	Rv2741	PE_PGRS47	PE-PGRS FAMILY PROTEIN [Mycobacterium tuberculosis H37Rv] [MASS=44210]	gi|57117018|ref|YP_177902.1|	6
230	Rv2768c	PPE43	PPE FAMILY PROTEIN [Mycobacterium tuberculosis H37Rv] [MASS=38627]	gi|57117022|ref|YP_177906.1|	4
231	Rv2770c	PPE44	PPE FAMILY PROTEIN [Mycobacterium tuberculosis H37Rv] [MASS=37467]	gi|57117024|ref|YP_177677.1|	2
232	Rv2771c	Rv2771c	hypothetical protein Rv2771c [Mycobacterium tuberculosis H37Rv] [MASS=16032]	gi|15609908|ref|NP_217287.1|	2
233	Rv2781c	Rv2781c	POSSIBLE ALANINE RICH OXIDOREDUCTASE [Mycobacterium tuberculosis H37Rv] [MASS=35393]	gi|15609918|ref|NP_217297.1|	5
234	Rv2783c	GpsI	polynucleotide phosphorylase/polyadenylase [Mycobacterium tuberculosis H37Rv] [MASS=79734]	gi|15609920|ref|NP_217299.1|	6
235	Rv2833c	UgpB	PROBABLE Sn-GLYCEROL-3-PHOSPHATE-BINDING LIPOPROTEIN UGPB [Mycobacterium tuberculosis H37Rv] [MASS=46725]	gi|15609970|ref|NP_217349.1|	3
236	Rv2853	PE_PGRS48	PE-PGRS FAMILY PROTEIN [Mycobacterium tuberculosis H37Rv] [MASS=51256]	gi|57117029|ref|YP_177909.1|	5
237	Rv2868c	GcpE	4-hydroxy-3-methylbut-2-en-1-yl diphosphate synthase [Mycobacterium tuberculosis H37Rv] [MASS=40482]	gi|15610005|ref|NP_217384.1|	3
238	Rv2881c	CdsA	PROBABLE INTEGRAL MEMBRANE PHOSPHATIDATE CYTIDYLYLTRANSFERASE CDSA (CDP-DIGLYCERIDE SYNTHETASE) (CDP-DIGLYCERIDE PYROPHOSPHORYLASE) (CDP-DIACYLGLYCEROL SYNTHASE) (CDS) (CTP:PHOSPHATIDATE CYTIDYLYLTRANSFERASE) (CDP-DAG SYNTHASE) (CDP-DG SYNTHETASE) [Mycobacterium tuberculosis H37Rv] [MASS=32035]	gi|15610018|ref|NP_217397.1|	4
239	Rv2888c	AmiC	amidase [Mycobacterium tuberculosis H37Rv] [MASS=50916]	gi|15610025|ref|NP_217404.1|	3
240	Rv2892c	PPE45	PPE FAMILY PROTEIN [Mycobacterium tuberculosis H37Rv] [MASS=41469]	gi|57117034|ref|YP_177913.1|	6
241	Rv2903c	LepB	PROBABLE SIGNAL PEPTIDASE I LEPB (SPASE I) (LEADER PEPTIDASE I). [Mycobacterium tuberculosis H37Rv] [MASS=31880]	gi|15610040|ref|NP_217419.1|	2
242	Rv2914c	PknI	PROBABLE TRANSMEMBRANE SERINE/THREONINE-PROTEIN KINASE I PKNI (PROTEIN KINASE I) (STPK I) (PHOSPHORYLASE B KINASE KINASE) (HYDROXYALKYL-PROTEIN KINASE) [Mycobacterium tuberculosis H37Rv] [MASS=61804]	gi|15610051|ref|NP_217430.1|	3
243	Rv2928	TesA	PROBABLE THIOESTERASE TESA [Mycobacterium tuberculosis H37Rv] [MASS=29152]	gi|15610065|ref|NP_217444.1|	2
244	Rv2931	PpsA	PHENOLPTHIOCEROL SYNTHESIS TYPE-I POLYKETIDE SYNTHASE PPSA [Mycobacterium tuberculosis H37Rv] [MASS=198834]	gi|15610068|ref|NP_217447.1|	6
245	Rv2932	PpsB	PHENOLPTHIOCEROL SYNTHESIS TYPE-I POLYKETIDE SYNTHASE PPSB [Mycobacterium tuberculosis H37Rv] [MASS=162527]	gi|15610069|ref|NP_217448.1|	4
246	Rv2933	PpsC	PHENOLPTHIOCEROL SYNTHESIS TYPE-I POLYKETIDE SYNTHASE PPSC [Mycobacterium tuberculosis H37Rv] [MASS=230620]	gi|15610070|ref|NP_217449.1|	11
247	Rv2934	PpsD	PHENOLPTHIOCEROL SYNTHESIS TYPE-I POLYKETIDE SYNTHASE PPSD [Mycobacterium tuberculosis H37Rv] [MASS=193313]	gi|15610071|ref|NP_217450.1|	3
248	Rv2936	DrrA	PROBABLE DAUNORUBICIN-DIM-TRANSPORT ATP-BINDING PROTEIN ABC TRANSPORTER DRRA [Mycobacterium tuberculosis H37Rv] [MASS=35818]	gi|15610073|ref|NP_217452.1|	3
249	Rv2940c	Mas	PROBABLE MULTIFUNCTIONAL MYCOCEROSIC ACID SYNTHASE MEMBRANE-ASSOCIATED MAS [Mycobacterium tuberculosis H37Rv] [MASS=224378]	gi|15610077|ref|NP_217456.1|	11
250	Rv2942	MmpL7	CONSERVED TRANSMEMBRANE TRANSPORT PROTEIN MMPL7 [Mycobacterium tuberculosis H37Rv] [MASS=95121]	gi|15610079|ref|NP_217458.1|	3
251	Rv2977c	ThiL	thiamine monophosphate kinase [Mycobacterium tuberculosis H37Rv] [MASS=34330]	gi|15610114|ref|NP_217493.1|	3
252	Rv3003c	IlvB1	acetolactate synthase 1 catalytic subunit [Mycobacterium tuberculosis H37Rv] [MASS=66122]	gi|57117044|ref|YP_177917.1|	10
253	Rv3031	Rv3031	hypothetical protein Rv3031 [Mycobacterium tuberculosis H37Rv] [MASS=57815]	gi|15610168|ref|NP_217547.1|	2
254	Rv3063	CstA	PROBABLE CARBON STARVATION PROTEIN A HOMOLOG CSTA [Mycobacterium tuberculosis H37Rv] [MASS=80163]	gi|15610200|ref|NP_217579.1|	2
255	Rv3078	Hab	PROBABLE HYDROXYLAMINOBENZENE MUTASE HAB [Mycobacterium tuberculosis H37Rv] [MASS=14080]	gi|15610215|ref|NP_217594.1|	2
256	Rv3080c	PknK	PROBABLE SERINE/THREONINE-PROTEIN KINASE TRANSCRIPTIONAL REGULATORY PROTEIN PKNK (PROTEIN KINASE K) (STPK K) [Mycobacterium tuberculosis H37Rv] [MASS=119417]	gi|15610217|ref|NP_217596.1|	3
257	Rv3084	LipR	PROBABLE ACETYL-HYDROLASE/ESTERASE LIPR [Mycobacterium tuberculosis H37Rv] [MASS=32617]	gi|15610221|ref|NP_217600.1|	2
258	Rv3097c	PE_PGRS63	PE-PGRS FAMILY PROTEIN, PROBABLY TRIACYLGLYCEROL LIPASE (ESTERASE/LIPASE) (TRIGLYCERIDE LIPASE) (TRIBUTYRASE) [Mycobacterium tuberculosis H37Rv] [MASS=45023]	gi|57117054|ref|YP_177924.1|	4
259	Rv3114	Rv3114	hypothetical protein Rv3114 [Mycobacterium tuberculosis H37Rv] [MASS=18875]	gi|15610251|ref|NP_217630.1|	5
260	Rv3125c	PPE49	PPE FAMILY PROTEIN [Mycobacterium tuberculosis H37Rv] [MASS=38585]	gi|57117062|ref|YP_177932.1|	8
261	Rv3139	FadE24	PROBABLE ACYL-CoA DEHYDROGENASE FADE24 [Mycobacterium tuberculosis H37Rv] [MASS=49646]	gi|15610275|ref|NP_217655.1|	2
262	Rv3144c	PPE52	PPE-FAMILY PROTEIN [Mycobacterium tuberculosis H37Rv] [MASS=39098]	gi|57117066|ref|YP_177936.1|	7
263	Rv3158	NuoN	NADH dehydrogenase subunit N [Mycobacterium tuberculosis H37Rv] [MASS=55342]	gi|15610294|ref|NP_217674.1|	3
264	Rv3159c	PPE53	PPE FAMILY PROTEIN [Mycobacterium tuberculosis H37Rv] [MASS=56585]	gi|57117067|ref|YP_177937.1|	2
265	Rv3201c	Rv3201c	PROBABLE ATP-DEPENDENT DNA HELICASE [Mycobacterium tuberculosis H37Rv] [MASS=116688]	gi|15610337|ref|NP_217717.1|	8
266	Rv3222c	Rv3222c	hypothetical protein Rv3222c [Mycobacterium tuberculosis H37Rv] [MASS=18315]	gi|15610358|ref|NP_217738.1|	4
267	Rv3239c	Rv3239c	PROBABLE CONSERVED TRANSMEMBRANE TRANSPORT PROTEIN [Mycobacterium tuberculosis H37Rv] [MASS=110198]	gi|15610375|ref|NP_217756.1|	5
268	Rv3253c	Rv3253c	POSSIBLE CATIONIC AMINO ACID TRANSPORT INTEGRAL MEMBRANE PROTEIN [Mycobacterium tuberculosis H37Rv] [MASS=52519]	gi|15610389|ref|NP_217770.1|	4
269	Rv3273	Rv3273	PROBABLE TRANSMEMBRANE CARBONIC ANHYDRASE (CARBONATE DEHYDRATASE) (CARBONIC DEHYDRATASE) [Mycobacterium tuberculosis H37Rv] [MASS=80565]	gi|15610409|ref|NP_217790.1|	5
270	Rv3292	Rv3292	hypothetical protein Rv3292 [Mycobacterium tuberculosis H37Rv] [MASS=45332]	gi|15610428|ref|NP_217809.1|	4
271	Rv3318	SdhA	succinate dehydrogenase flavoprotein subunit [Mycobacterium tuberculosis H37Rv] [MASS=64825]	gi|15610454|ref|NP_217835.1|	2
272	Rv3343c	PPE54	PPE FAMILY PROTEIN [Mycobacterium tuberculosis H37Rv] [MASS=250344]	gi|57117092|ref|YP_177960.1|	2
273	Rv3345c	PE_PGRS50	PE-PGRS FAMILY PROTEIN [Mycobacterium tuberculosis H37Rv] [MASS=129384]	gi|57117094|ref|YP_177962.1|	5
274	Rv3347c	PPE55	PPE FAMILY PROTEIN [Mycobacterium tuberculosis H37Rv] [MASS=309556]	gi|57117095|ref|YP_177963.1|	9
275	Rv3350c	PPE56	PPE FAMILY PROTEIN [Mycobacterium tuberculosis H37Rv] [MASS=363348]	gi|57117096|ref|YP_177964.1|	9
276	Rv3354	Rv3354	hypothetical protein Rv3354 [Mycobacterium tuberculosis H37Rv] [MASS=12988]	gi|15610490|ref|NP_217871.1|	5
277	Rv3367	PE_PGRS51	PE-PGRS FAMILY PROTEIN [Mycobacterium tuberculosis H37Rv] [MASS=49707]	gi|57117098|ref|YP_177965.1|	3
278	Rv3375	AmiD	PROBABLE AMIDASE AMID (ACYLAMIDASE) (ACYLASE) [Mycobacterium tuberculosis H37Rv] [MASS=50645]	gi|15610511|ref|NP_217892.1|	4
279	Rv3394c	Rv3394c	hypothetical protein Rv3394c [Mycobacterium tuberculosis H37Rv] [MASS=56666]	gi|15610530|ref|NP_217911.1|	4
280	Rv3396c	GuaA	bifunctional GMP synthase/glutamine amidotransferase protein [Mycobacterium tuberculosis H37Rv] [MASS=56059]	gi|15610532|ref|NP_217913.1|	3
281	Rv3401	Rv3401	hypothetical protein Rv3401 [Mycobacterium tuberculosis H37Rv] [MASS=87315]	gi|15610537|ref|NP_217918.1|	3
282	Rv3433c	Rv3433c	hypothetical protein Rv3433c [Mycobacterium tuberculosis H37Rv] [MASS=46857]	gi|15610569|ref|NP_217950.1|	4
283	Rv3447c	Rv3447c	PROBABLE CONSERVED MEMBRANE PROTEIN [Mycobacterium tuberculosis H37Rv] [MASS=131895]	gi|15610583|ref|NP_217964.1|	2
284	Rv3478	PPE60	PE FAMILY PROTEIN [Mycobacterium tuberculosis H37Rv] [MASS=39413]	gi|57117111|ref|YP_177976.1|	3
285	Rv3483c	Rv3483c	hypothetical protein Rv3483c [Mycobacterium tuberculosis H37Rv] [MASS=22982]	gi|15610619|ref|NP_218000.1|	2
286	Rv3491	Rv3491	hypothetical protein Rv3491 [Mycobacterium tuberculosis H37Rv] [MASS=20363]	gi|15610627|ref|NP_218008.1|	3
287	Rv3507	PE_PGRS53	PE-PGRS FAMILY PROTEIN [Mycobacterium tuberculosis H37Rv] [MASS=110622]	gi|57117114|ref|YP_177978.1|	11
288	Rv3508	PE_PGRS54	PE-PGRS FAMILY PROTEIN [Mycobacterium tuberculosis H37Rv] [MASS=147624]	gi|57117115|ref|YP_177979.1|	14
289	Rv3512	PE_PGRS56	PE-PGRS FAMILY PROTEIN [Mycobacterium tuberculosis H37Rv] [MASS=81161]	gi|57117117|ref|YP_177981.1|	13
290	Rv3514	PE_PGRS57	PE-PGRS FAMILY PROTEIN [Mycobacterium tuberculosis H37Rv] [MASS=115752]	gi|57117118|ref|YP_177982.1|	17
291	Rv3537	Rv3537	3-ketosteroid-delta-1-dehydrogenase [Mycobacterium tuberculosis H37Rv] [MASS=60636]	gi|15610673|ref|NP_218054.1|	2
292	Rv3550	EchA20	enoyl-CoA hydratase [Mycobacterium tuberculosis H37Rv] [MASS=26333]	gi|15610686|ref|NP_218067.1|	2
293	Rv3556c	FadA6	acetyl-CoA acetyltransferase [Mycobacterium tuberculosis H37Rv] [MASS=40902]	gi|15610692|ref|NP_218073.1|	3
294	Rv3573c	FadE34	PROBABLE ACYL-CoA DEHYDROGENASE FADE34 [Mycobacterium tuberculosis H37Rv] [MASS=74578]	gi|15610709|ref|NP_218090.1|	4
295	Rv3590c	PE_PGRS58	PE-PGRS FAMILY PROTEIN [Mycobacterium tuberculosis H37Rv] [MASS=48398]	gi|57117129|ref|YP_177993.1|	6
296	Rv3595c	PE_PGRS59	PE-PGRS FAMILY PROTEIN [Mycobacterium tuberculosis H37Rv] [MASS=37142]	gi|57117130|ref|YP_177994.1|	3
297	Rv3621c	PPE65	PPE FAMILY PROTEIN [Mycobacterium tuberculosis H37Rv] [MASS=40680]	gi|57117135|ref|YP_177998.1|	3
298	Rv3661	Rv3661	hypothetical protein Rv3661 [Mycobacterium tuberculosis H37Rv] [MASS=30711]	gi|15610797|ref|NP_218178.1|	3
299	Rv3695	Rv3695	POSSIBLE CONSERVED MEMBRANE PROTEIN [Mycobacterium tuberculosis H37Rv] [MASS=33168]	gi|15610831|ref|NP_218212.1|	2
300	Rv3710	LeuA	2-isopropylmalate synthase [Mycobacterium tuberculosis H37Rv] [MASS=65888]	gi|161352459|ref|NP_218227.2|	6
301	Rv3711c	DnaQ	DNA polymerase III subunit epsilon [Mycobacterium tuberculosis H37Rv] [MASS=35782]	gi|15610847|ref|NP_218228.1|	4
302	Rv3726	Rv3726	POSSIBLE DEHYDROGENASE [Mycobacterium tuberculosis H37Rv] [MASS=42036]	gi|15610862|ref|NP_218243.1|	4
303	Rv3752c	Rv3752c	POSSIBLE CYTIDINE/DEOXYCYTIDYLATE DEAMINASE [Mycobacterium tuberculosis H37Rv] [MASS=15877]	gi|15610888|ref|NP_218269.1|	2
304	Rv3762c	Rv3762c	POSSIBLE HYDROLASE [Mycobacterium tuberculosis H37Rv] [MASS=68483]	gi|15610898|ref|NP_218279.1|	3
305	Rv3779	Rv3779	PROBABLE CONSERVED TRANSMEMBRANE PROTEIN ALANINE AND LEUCINE RICH [Mycobacterium tuberculosis H37Rv] [MASS=71794]	gi|15610915|ref|NP_218296.1|	3
306	Rv3794	EmbA	INTEGRAL MEMBRANE INDOLYLACETYLINOSITOL ARABINOSYLTRANSFERASE EMBA (ARABINOSYLINDOLYLACETYLINOSITOL SYNTHASE) [Mycobacterium tuberculosis H37Rv] [MASS=115723]	gi|15610930|ref|NP_218311.1|	2
307	Rv3800c	Pks13	POLYKETIDE SYNTHASE PKS13 [Mycobacterium tuberculosis H37Rv] [MASS=186444]	gi|15610936|ref|NP_218317.1|	3
308	Rv3808c	GlfT	BIFUNCTIONAL UDP-GALACTOFURANOSYL TRANSFERASE GLFT [Mycobacterium tuberculosis H37Rv] [MASS=71506]	gi|15610944|ref|NP_218325.1|	3
309	Rv3812	PE_PGRS62	PE-PGRS FAMILY PROTEIN [Mycobacterium tuberculosis H37Rv] [MASS=51821]	gi|57117161|ref|YP_178019.1|	6
310	Rv3824c	PapA1	PROBABLE CONSERVED POLYKETIDE SYNTHASE ASSOCIATED PROTEIN PAPA1 [Mycobacterium tuberculosis H37Rv] [MASS=56127]	gi|15610960|ref|NP_218341.1|	3
311	Rv3826	FadD23	acyl-CoA synthetase [Mycobacterium tuberculosis H37Rv] [MASS=62840]	gi|15610962|ref|NP_218343.1|	3
312	Rv3829c	Rv3829c	PROBABLE DEHYDROGENASE [Mycobacterium tuberculosis H37Rv] [MASS=57073]	gi|15610965|ref|NP_218346.1|	4
313	Rv3835	Rv3835	PROBABLE CONSERVED MEMBRANE PROTEIN [Mycobacterium tuberculosis H37Rv] [MASS=47043]	gi|15610971|ref|NP_218352.1|	5
314	Rv3859c	GltB	PROBABLE FERREDOXIN-DEPENDENT GLUTAMATE SYNTHASE [NADPH] (LARGE SUBUNIT) GLTB (L-GLUTAMATE SYNTHASE) (L-GLUTAMATE SYNTHETASE) (NADH-GLUTAMATE SYNTHASE) (GLUTAMATE SYNTHASE (NADH))(NADPH-GOGAT) [Mycobacterium tuberculosis H37Rv] [MASS=165942]	gi|15610995|ref|NP_218376.1|	4
315	Rv3870	Rv3870	POSSIBLE CONSERVED TRANSMEMBRANE PROTEIN [Mycobacterium tuberculosis H37Rv] [MASS=80912]	gi|15611006|ref|NP_218387.1|	4
316	Rv3876	Rv3876	CONSERVED HYPOTHETICAL PROLINE AND ALANINE RICH PROTEIN [Mycobacterium tuberculosis H37Rv] [MASS=70645]	gi|15611012|ref|NP_218393.1|	3
317	Rv3878	Rv3878	CONSERVED HYPOTHETICAL ALANINE RICH PROTEIN [Mycobacterium tuberculosis H37Rv] [MASS=27395]	gi|15611014|ref|NP_218395.1|	5
318	Rv3879c	Rv3879c	HYPOTHETICAL ALANINE AND PROLINE RICH PROTEIN [Mycobacterium tuberculosis H37Rv] [MASS=74492]	gi|15611015|ref|NP_218396.1|	2
319	Rv3881c	Rv3881c	CONSERVED HYPOTHETICAL ALANINE AND GLYCINE RICH PROTEIN [Mycobacterium tuberculosis H37Rv] [MASS=47593]	gi|15611017|ref|NP_218398.1|	3
320	Rv3892c	PPE69	PPE FAMILY PROTEIN [Mycobacterium tuberculosis H37Rv] [MASS=38852]	gi|57117166|ref|YP_178024.1|	6
321	Rv3897c	Rv3897c	hypothetical protein Rv3897c [Mycobacterium tuberculosis H37Rv] [MASS=20285]	gi|15611033|ref|NP_218414.1|	4
322	Rv3899c	Rv3899c	hypothetical protein Rv3899c [Mycobacterium tuberculosis H37Rv] [MASS=40788]	gi|15611035|ref|NP_218416.1|	7
323	Rv3912	Rv3912	HYPOTHETICAL ALANINE RICH PROTEIN [Mycobacterium tuberculosis H37Rv] [MASS=25769]	gi|15611048|ref|NP_218429.1|	3
