# Supplementary material for: Portrait of a Pathogen: The Mycobacterium tuberculosis Proteome In Vivo
Source: PLoS One. 2010 Nov 11;5(11):e13938. doi: 10.1371/journal.pone.0013938 (PMC2978697; doi:10.1371/journal.pone.0013938)
Supplement: Table S3 — Spectral counts of the Mtb proteins identified in 30-day and 90-day infected guinea pig lungs. (0.22 MB XLS) [file pone.0013938.s003.xls]

## Sheet: Sheet1
Table S3. Spectral Counts of the Mtb Proteins Identified in 30-day and 90-day Infected Guinea Pig Lungs
#	ORF	Protein Name	Protein Description [Protein Mass in Da]	Accession Number	30 day (Spectral Counts)	Normalized 30 day (Spectral Counts)	90 day (Spectral Counts)	Normalized 90 day (Spectral Counts)	Total Spectral Counts	Normalized Total Spectral Counts
1	Rv0001	DnaA	chromosomal replication initiation protein [MASS=56566]	gi|15607143|ref|NP_214515.1|	0	0	4	4.48	4	4.48
2	Rv0014c	PknB	TRANSMEMBRANE SERINE/THREONINE-PROTEIN KINASE B PKNB (PROTEIN KINASE B) (STPK B) [MASS=66509]	gi|15607156|ref|NP_214528.1|	0	0	5	5.6	5	5.6
3	Rv0015c	PknA	TRANSMEMBRANE SERINE/THREONINE-PROTEIN KINASE A PKNA (PROTEIN KINASE A) (STPK A) [MASS=45597]	gi|15607157|ref|NP_214529.1|	17	15.3	5	5.6	22	20.9
4	Rv0020c	TB39.8	hypothetical protein Rv0020c [MASS=56880]	gi|15607162|ref|NP_214534.1|	0	0	8	8.96	8	8.96
5	Rv0026	Rv0026	hypothetical protein Rv0026 [MASS=46475]	gi|15607168|ref|NP_214540.1|	5	4.5	0	0	5	4.5
6	Rv0032	BioF2	POSSIBLE 8-AMINO-7-OXONONANOATE SYNTHASE BIOF2 (AONS) (8-AMINO-7-KETOPELARGONATE SYNTHASE) (7-KETO-8-AMINO-PELARGONIC ACID SYNTHETASE) (7-KAP SYNTHETASE) (L-ALANINE--PIMELYL CoA LIGASE) [MASS=86243]	gi|15607174|ref|NP_214546.1|	4	3.6	0	0	4	3.6
7	Rv0039c	Rv0039c	POSSIBLE CONSERVED TRANSMEMBRANE PROTEIN [MASS=11292]	gi|15607181|ref|NP_214553.1|	3	2.7	0	0	3	2.7
8	Rv0060	Rv0060	hypothetical protein Rv0060 [MASS=38563]	gi|15607202|ref|NP_214574.1|	2	1.8	0	0	2	1.8
9	Rv0069c	SdaA	PROBABLE L-SERINE DEHYDRATASE SDAA (L-SERINE DEAMINASE) (SDH) (L-SD) [MASS=48576]	gi|15607211|ref|NP_214583.1|	0	0	6	6.72	6	6.72
10	Rv0096	PPE1	PPE FAMILY PROTEIN [MASS=46895]	gi|57116689|ref|YP_177690.1|	0	0	5	5.6	5	5.6
11	Rv0099	FadD10	acyl-CoA synthetase [MASS=56589]	gi|15607241|ref|NP_214613.1|	0	0	5	5.6	5	5.6
12	Rv0101	Nrp	PROBABLE PEPTIDE SYNTHETASE NRP (PEPTIDE SYNTHASE) [MASS=269407]	gi|15607243|ref|NP_214615.1|	25	22.5	0	0	25	22.5
13	Rv0102	Rv0102	PROBABLE CONSERVED INTEGRAL MEMBRANE PROTEIN [MASS=70356]	gi|15607244|ref|NP_214616.1|	3	2.7	0	0	3	2.7
14	Rv0103c	CtpB	PROBABLE CATION-TRANSPORTER P-TYPE ATPASE B CTPB [MASS=77509]	gi|15607245|ref|NP_214617.1|	0	0	10	11.2	10	11.2
15	Rv0107c	CtpI	PROBABLE CATION-TRANSPORTER ATPASE I CTPI [MASS=169606]	gi|15607249|ref|NP_214621.1|	0	0	9	10.08	9	10.08
16	Rv0109	PE_PGRS1	PE-PGRS FAMILY PROTEIN [MASS=42288]	gi|57116691|ref|YP_177692.1|	0	0	4	4.48	4	4.48
17	Rv0117	OxyS	OXIDATIVE STRESS RESPONSE REGULATORY PROTEIN OXYS [MASS=34223]	gi|15607259|ref|NP_214631.1|	0	0	7	7.84	7	7.84
18	Rv0118c	OxcA	putative oxalyl-CoA decarboxylase [MASS=61171]	gi|15607260|ref|NP_214632.1|	0	0	9	10.08	9	10.08
19	Rv0124	PE_PGRS2	PE-PGRS FAMILY PROTEIN [MASS=40890]	gi|57116692|ref|YP_177693.1|	4	3.6	3	3.36	7	6.96
20	Rv0141c	Rv0141c	hypothetical protein Rv0141c [MASS=15490]	gi|15607283|ref|NP_214655.1|	3	2.7	0	0	3	2.7
21	Rv0143c	Rv0143c	PROBABLE CONSERVED TRANSMEMBRANE PROTEIN [MASS=50808]	gi|15607285|ref|NP_214657.1|	0	0	7	7.84	7	7.84
22	Rv0145	Rv0145	hypothetical protein Rv0145 [MASS=34381]	gi|15607287|ref|NP_214659.1|	6	5.4	0	0	6	5.4
23	Rv0151c	PE1	PE FAMILY PROTEIN [MASS=61411]	gi|57116694|ref|YP_177695.1|	15	13.5	0	0	15	13.5
24	Rv0157	PntB	PROBABLE NAD(P) TRANSHYDROGENASE (SUBUNIT BETA) PNTB [INTEGRAL MEMBRANE PROTEIN] (PYRIDINE NUCLEOTIDE TRANSHYDROGENASE SUBUNIT BETA) (NICOTINAMIDE NUCLEOTIDE TRANSHYDROGENASE SUBUNIT BETA) [MASS=48858]	gi|15607299|ref|NP_214671.1|	0	0	2	2.24	2	2.24
25	Rv0160c	PE4	PE FAMILY PROTEIN [MASS=53055]	gi|57116697|ref|YP_177698.1|	5	4.5	0	0	5	4.5
26	Rv0171	Mce1C	MCE-FAMILY PROTEIN MCE1C [MASS=53817]	gi|15607312|ref|NP_214685.1|	0	0	2	2.24	2	2.24
27	Rv0172	Mce1D	MCE-FAMILY PROTEIN MCE1D [MASS=56516]	gi|15607313|ref|NP_214686.1|	3	2.7	0	0	3	2.7
28	Rv0174	Mce1F	MCE-FAMILY PROTEIN MCE1F [MASS=54037]	gi|15607315|ref|NP_214688.1|	0	0	4	4.48	4	4.48
29	Rv0176	Rv0176	PROBABLE CONSERVED MCE ASSOCIATED TRANSMEMBRANE PROTEIN [MASS=35437]	gi|15607317|ref|NP_214690.1|	3	2.7	0	0	3	2.7
30	Rv0182c	SigG	RNA polymerase factor sigma-70 [MASS=40982]	gi|15607323|ref|NP_214696.1|	0	0	5	5.6	5	5.6
31	Rv0183	Rv0183	POSSIBLE LYSOPHOSPHOLIPASE [MASS=30261]	gi|57116702|ref|NP_214697.2|	0	0	2	2.24	2	2.24
32	Rv0189c	IlvD	dihydroxy-acid dehydratase [MASS=59351]	gi|15607330|ref|NP_214703.1|	4	3.6	0	0	4	3.6
33	Rv0196	Rv0196	POSSIBLE TRANSCRIPTIONAL REGULATORY PROTEIN [MASS=21241]	gi|15607337|ref|NP_214710.1|	6	5.4	0	0	6	5.4
34	Rv0197	Rv0197	POSSIBLE OXIDOREDUCTASE [MASS=82571]	gi|15607338|ref|NP_214711.1|	2	1.8	0	0	2	1.8
35	Rv0199	Rv0199	PROBABLE CONSERVED MEMBRANE PROTEIN [MASS=23520]	gi|15607340|ref|NP_214713.1|	0	0	6	6.72	6	6.72
36	Rv0202	MmpL11	PROBABLE CONSERVED TRANSMEMBRANE TRANSPORT PROTEIN MMPL11 [MASS=103502]	gi|15607343|ref|NP_214716.1|	0	0	10	11.2	10	11.2
37	Rv0214	FadD4	acyl-CoA synthetase [MASS=58889]	gi|15607355|ref|NP_214728.1|	3	2.7	3	3.36	6	6.06
38	Rv0222	EchA1	enoyl-CoA hydratase [MASS=27280]	gi|15607363|ref|NP_214736.1|	4	3.6	0	0	4	3.6
39	Rv0235c	Rv0235c	PROBABLE CONSERVED TRANSMEMBRANE PROTEIN [MASS=54837]	gi|15607376|ref|NP_214749.1|	4	3.6	2	2.24	6	5.84
40	Rv0236c	Rv0236c	PROBABLE CONSERVED TRANSMEMBRANE PROTEIN [MASS=146279]	gi|15607377|ref|NP_214750.1|	0	0	5	5.6	5	5.6
41	Rv0242c	FabG4	3-ketoacyl-(acyl-carrier-protein) reductase [MASS=46830]	gi|15607383|ref|NP_214756.1|	0	0	4	4.48	4	4.48
42	Rv0252	NirB	PROBABLE NITRITE REDUCTASE [NAD(P)H] LARGE SUBUNIT [FAD FLAVOPROTEIN] NIRB [MASS=90352]	gi|15607393|ref|NP_214766.1|	3	2.7	5	5.6	8	8.3
43	Rv0267	NarU	PROBABLE INTEGRAL MEMBRANE NITRITE EXTRUSION PROTEIN NARU (NITRITE FACILITATOR) [MASS=49133]	gi|15607408|ref|NP_214781.1|	4	3.6	0	0	4	3.6
44	Rv0278c	PE_PGRS3	PE-PGRS FAMILY PROTEIN [MASS=81904]	gi|57116712|ref|YP_177707.1|	7	6.3	6	6.72	13	13.02
45	Rv0279c	PE_PGRS4	PE-PGRS FAMILY PROTEIN [MASS=68986]	gi|57116713|ref|YP_177708.1|	3	2.7	6	6.72	9	9.42
46	Rv0280	PPE3	PPE FAMILY PROTEIN [MASS=54707]	gi|57116714|ref|YP_177709.1|	0	0	8	8.96	8	8.96
47	Rv0284	Rv0284	POSSIBLE CONSERVED MEMBRANE PROTEIN [MASS=145169]	gi|15607425|ref|NP_214798.1|	0	0	4	4.48	4	4.48
48	Rv0297	PE_PGRS5	PE-PGRS FAMILY PROTEIN [MASS=49057]	gi|57116718|ref|YP_177713.1|	0	0	10	11.2	10	11.2
49	Rv0301	Rv0301	hypothetical protein Rv0301 [MASS=15746]	gi|15607442|ref|NP_214815.1|	2	1.8	0	0	2	1.8
50	Rv0304c	PPE5	PPE FAMILY PROTEIN [MASS=215693]	gi|57116719|ref|YP_177714.1|	5	4.5	0	0	5	4.5
51	Rv0329c	Rv0329c	hypothetical protein Rv0329c [MASS=21993]	gi|15607470|ref|NP_214843.1|	3	2.7	0	0	3	2.7
52	Rv0338c	Rv0338c	PROBABLE IRON-SULFUR-BINDING REDUCTASE [MASS=95485]	gi|15607479|ref|NP_214852.1|	5	4.5	0	0	5	4.5
53	Rv0341	IniB	ISONIAZID INDUCTIBLE GENE PROTEIN INIB [MASS=43921]	gi|15607482|ref|NP_214855.1|	0	0	4	4.48	4	4.48
54	Rv0342	IniA	ISONIAZID INDUCTIBLE GENE PROTEIN INIA [MASS=70082]	gi|15607483|ref|NP_214856.1|	2	1.8	0	0	2	1.8
55	Rv0343	IniC	ISONIAZID INDUCTIBLE GENE PROTEIN INIC [MASS=53019]	gi|15607484|ref|NP_214857.1|	8	7.2	0	0	8	7.2
56	Rv0354c	PPE7	PPE FAMILY PROTEIN [MASS=14422]	gi|57116725|ref|YP_177720.1|	0	0	6	6.72	6	6.72
57	Rv0355c	PPE8	PPE FAMILY PROTEIN [MASS=327028]	gi|57116726|ref|YP_177721.1|	7	6.3	8	8.96	15	15.26
58	Rv0398c	Rv0398c	POSSIBLE SECRETED PROTEIN [MASS=21655]	gi|15607539|ref|NP_214912.1|	4	3.6	0	0	4	3.6
59	Rv0405	Pks6	PROBABLE MEMBRANE BOUND POLYKETIDE SYNTHASE PKS6 [MASS=147612]	gi|15607546|ref|NP_214919.1|	6	5.4	0	0	6	5.4
60	Rv0410c	PknG	SERINE/THREONINE-PROTEIN KINASE PKNG (PROTEIN KINASE G) (STPK G) [MASS=81577]	gi|15607551|ref|NP_214924.1|	0	0	2	2.24	2	2.24
61	Rv0413	MutT3	POSSIBLE MUTATOR PROTEIN MUTT3 (7,8-DIHYDRO-8-OXOGUANINE-TRIPHOSPHATASE) (8-OXO-DGTPASE) (DGTP PYROPHOSPHOHYDROLASE) [MASS=23499]	gi|15607554|ref|NP_214927.1|	0	0	12	13.44	12	13.44
62	Rv0421c	Rv0421c	hypothetical protein Rv0421c [MASS=21738]	gi|15607562|ref|NP_214935.1|	2	1.8	0	0	2	1.8
63	Rv0423c	ThiC	thiamine biosynthesis protein ThiC [MASS=59897]	gi|15607564|ref|NP_214937.1|	4	3.6	0	0	4	3.6
64	Rv0425c	CtpH	POSSIBLE METAL CATION TRANSPORTING P-TYPE ATPASE CTPH [MASS=159772]	gi|15607566|ref|NP_214939.1|	4	3.6	9	10.08	13	13.68
65	Rv0435c	Rv0435c	PUTATIVE CONSERVED ATPASE [MASS=75346]	gi|15607576|ref|NP_214949.1|	0	0	3	3.36	3	3.36
66	Rv0438c	MoeA2	PROBABLE MOLYBDOPTERIN BIOSYNTHESIS PROTEIN MOEA2 [MASS=42021]	gi|57116730|ref|YP_177725.1|	4	3.6	0	0	4	3.6
67	Rv0442c	PPE10	PPE FAMILY PROTEIN [MASS=47246]	gi|57116731|ref|YP_177726.1|	3	2.7	8	8.96	11	11.66
68	Rv0450c	MmpL4	PROBABLE CONSERVED TRANSMEMBRANE TRANSPORT PROTEIN MMPL4 [MASS=105234]	gi|15607591|ref|NP_214964.1|	3	2.7	0	0	3	2.7
69	Rv0453	PPE11	PPE FAMILY PROTEIN [MASS=52836]	gi|57116732|ref|YP_177727.1|	4	3.6	0	0	4	3.6
70	Rv0462	Lpd	dihydrolipoamide dehydrogenase [MASS=49239]	gi|15607603|ref|NP_214976.1|	2	1.8	0	0	2	1.8
71	Rv0479c	Rv0479c	PROBABLE CONSERVED MEMBRANE PROTEIN [MASS=37048]	gi|15607620|ref|NP_214993.1|	0	0	3	3.36	3	3.36
72	Rv0490	SenX3	PUTATIVE TWO COMPONENT SENSOR HISTIDINE KINASE SENX3 [MASS=44824]	gi|15607631|ref|NP_215004.1|	2	1.8	0	0	2	1.8
73	Rv0494	Rv0494	PROBABLE TRANSCRIPTIONAL REGULATORY PROTEIN (PROBABLY GNTR-FAMILY) [MASS=26014]	gi|57116742|ref|NP_215008.2|	2	1.8	0	0	2	1.8
74	Rv0496	Rv0496	hypothetical protein Rv0496 [MASS=34875]	gi|15607637|ref|NP_215010.1|	2	1.8	0	0	2	1.8
75	Rv0507	MmpL2	PROBABLE CONSERVED TRANSMEMBRANE TRANSPORT PROTEIN MMPL2 [MASS=106201]	gi|15607648|ref|NP_215021.1|	0	0	7	7.84	7	7.84
76	Rv0522	GabP	PROBABLE GABA PERMEASE GABP (4-AMINO BUTYRATE TRANSPORT CARRIER) (GAMA-AMINOBUTYRATE PERMEASE) [MASS=46030]	gi|57116749|ref|YP_177734.1|	0	0	5	5.6	5	5.6
77	Rv0533c	FabH	3-oxoacyl-(acyl carrier protein) synthase III [MASS=34872]	gi|15607673|ref|NP_215047.1|	0	0	4	4.48	4	4.48
78	Rv0535	Pnp	5'-methylthioadenosine phosphorylase [MASS=27964]	gi|15607675|ref|NP_215049.1|	3	2.7	0	0	3	2.7
79	Rv0545c	PitA	PROBABLE LOW-AFFINITY INORGANIC PHOSPHATE TRANSPORTER INTEGRAL MEMBRANE PROTEIN PITA [MASS=42745]	gi|15607685|ref|NP_215059.1|	0	0	5	5.6	5	5.6
80	Rv0547c	Rv0547c	short chain dehydrogenase [MASS=31867]	gi|15607687|ref|NP_215061.1|	6	5.4	0	0	6	5.4
81	Rv0551c	FadD8	acyl-CoA synthetase [MASS=61065]	gi|15607691|ref|NP_215065.1|	0	0	3	3.36	3	3.36
82	Rv0570	NrdZ	PROBABLE RIBONUCLEOSIDE-DIPHOSPHATE REDUCTASE (LARGE SUBUNIT) NRDZ (RIBONUCLEOTIDE REDUCTASE) [MASS=74521]	gi|15607710|ref|NP_215084.1|	5	4.5	6	6.72	11	11.22
83	Rv0579	Rv0579	hypothetical protein Rv0579 [MASS=28540]	gi|15607719|ref|NP_215093.1|	3	2.7	0	0	3	2.7
84	Rv0582	Rv0582	hypothetical protein Rv0582 [MASS=14503]	gi|15607722|ref|NP_215096.1|	0	0	3	3.36	3	3.36
85	Rv0585c	Rv0585c	PROBABLE CONSERVED INTEGRAL MEMBRANE PROTEIN [MASS=84041]	gi|15607725|ref|NP_215099.1|	0	0	3	3.36	3	3.36
86	Rv0588	YrbE2B	CONSERVED HYPOTHETICAL INTEGRAL MEMBRANE PROTEIN YRBE2B [MASS=30968]	gi|15607728|ref|NP_215102.1|	0	0	9	10.08	9	10.08
87	Rv0591	Mce2C	MCE-FAMILY PROTEIN MCE2C [MASS=50764]	gi|15607731|ref|NP_215105.1|	0	0	7	7.84	7	7.84
88	Rv0625c	Rv0625c	PROBABLE CONSERVED TRANSMEMBRANE PROTEIN [MASS=25212]	gi|15607765|ref|NP_215139.1|	0	0	2	2.24	2	2.24
89	Rv0630c	RecB	PROBABLE EXONUCLEASE V (BETA CHAIN) RECB (EXODEOXYRIBONUCLEASE V BETA CHAIN)(EXODEOXYRIBONUCLEASE V POLYPEPTIDE) (CHI-SPECIFIC ENDONUCLEASE) [MASS=118721]	gi|15607770|ref|NP_215144.1|	0	0	3	3.36	3	3.36
90	Rv0650	Rv0650	POSSIBLE SUGAR KINASE [MASS=29270]	gi|15607790|ref|NP_215164.1|	0	0	4	4.48	4	4.48
91	Rv0663	AtsD	POSSIBLE ARYLSULFATASE ATSD (ARYL-SULFATE SULPHOHYDROLASE) (ARYLSULPHATASE) [MASS=86127]	gi|15607803|ref|NP_215177.1|	0	0	9	10.08	9	10.08
92	Rv0667	RpoB	DNA-directed RNA polymerase subunit beta [MASS=129235]	gi|15607807|ref|NP_215181.1|	6	5.4	0	0	6	5.4
93	Rv0672	FadE8	PROBABLE ACYL-CoA DEHYDROGENASE FADE8 [MASS=58534]	gi|15607812|ref|NP_215186.1|	6	5.4	0	0	6	5.4
94	Rv0676c	MmpL5	PROBABLE CONSERVED TRANSMEMBRANE TRANSPORT PROTEIN MMPL5 [MASS=104784]	gi|15607816|ref|NP_215190.1|	0	0	4	4.48	4	4.48
95	Rv0679c	Rv0679c	CONSERVED HYPOTHETICAL THREONINE RICH PROTEIN [MASS=16586]	gi|15607819|ref|NP_215193.1|	0	0	4	4.48	4	4.48
96	Rv0694	LldD1	POSSIBLE L-LACTATE DEHYDROGENASE (CYTOCHROME) LLDD1 [MASS=42161]	gi|15607834|ref|NP_215208.1|	0	0	3	3.36	3	3.36
97	Rv0697	Rv0697	PROBABLE DEHYDROGENASE [MASS=50291]	gi|15607837|ref|NP_215211.1|	3	2.7	0	0	3	2.7
98	Rv0698	Rv0698	hypothetical protein Rv0698 [MASS=22325]	gi|15607838|ref|NP_215212.1|	12	10.8	0	0	12	10.8
99	Rv0711	AtsA	POSSIBLE ARYLSULFATASE ATSA (ARYL-SULFATE SULPHOHYDROLASE) (ARYLSULPHATASE) [MASS=86214]	gi|15607851|ref|NP_215225.1|	4	3.6	0	0	4	3.6
100	Rv0712	Rv0712	hypothetical protein Rv0712 [MASS=32744]	gi|15607852|ref|NP_215226.1|	0	0	4	4.48	4	4.48
101	Rv0724	SppA	POSSIBLE PROTEASE IV SPPA (ENDOPEPTIDASE IV) (SIGNAL PEPTIDE PEPTIDASE) [MASS=65935]	gi|15607864|ref|NP_215238.1|	0	0	6	6.72	6	6.72
102	Rv0725c	Rv0725c	hypothetical protein Rv0725c [MASS=32247]	gi|15607865|ref|NP_215239.1|	8	7.2	0	0	8	7.2
103	Rv0746	PE_PGRS9	PE-PGRS FAMILY PROTEIN [MASS=64157]	gi|57116773|ref|YP_177750.1|	10	9	9	10.08	19	19.08
104	Rv0747	PE_PGRS10	PE-PGRS FAMILY PROTEIN [MASS=65406]	gi|57116774|ref|YP_177751.1|	5	4.5	11	12.32	16	16.82
105	Rv0754	PE_PGRS11	PE-PGRS FAMILY PROTEIN [MASS=56945]	gi|57116776|ref|YP_177752.1|	5	4.5	9	10.08	14	14.58
106	Rv0755c	PPE12	PPE FAMILY PROTEIN [MASS=62692]	gi|57116777|ref|YP_177753.1|	0	0	4	4.48	4	4.48
107	Rv0761c	AdhB	POSSIBLE ZINC-CONTAINING ALCOHOL DEHYDROGENASE NAD DEPENDENT ADHB [MASS=39747]	gi|57116779|ref|YP_177754.1|	2	1.8	0	0	2	1.8
108	Rv0770	Rv0770	PROBABLE DEHYDROGENASE/REDUCTASE [MASS=30446]	gi|15607910|ref|NP_215284.1|	0	0	6	6.72	6	6.72
109	Rv0773c	GgtA	PROBABLE BIFUNCTIONAL ACYLASE GGTA: CEPHALOSPORIN ACYLASE (GL-7ACA ACYLASE) + GAMMA-GLUTAMYLTRANSPEPTIDASE (GGT) [MASS=54593]	gi|15607913|ref|NP_215287.1|	0	0	3	3.36	3	3.36
110	Rv0783c	EmrB	POSSIBLE MULTIDRUG RESISTANCE INTEGRAL MEMBRANE EFFLUX PROTEIN EMRB [MASS=56587]	gi|15607923|ref|NP_215297.1|	0	0	6	6.72	6	6.72
111	Rv0794c	Rv0794c	PROBABLE OXIDOREDUCTASE [MASS=52476]	gi|57116784|ref|YP_177756.1|	3	2.7	0	0	3	2.7
112	Rv0823c	Rv0823c	POSSIBLE TRANSCRIPTIONAL REGULATORY PROTEIN [MASS=41388]	gi|15607963|ref|NP_215338.1|	4	3.6	0	0	4	3.6
113	Rv0834c	PE_PGRS14	PE-PGRS FAMILY PROTEIN [MASS=71698]	gi|57116789|ref|YP_177761.1|	4	3.6	8	8.96	12	12.56
114	Rv0846c	Rv0846c	PROBABLE OXIDASE [MASS=53796]	gi|15607986|ref|NP_215361.1|	4	3.6	0	0	4	3.6
115	Rv0852	FadD16	POSSIBLE FATTY-ACID-CoA LIGASE FADD16 (FATTY-ACID-CoA SYNTHETASE) (FATTY-ACID-CoA SYNTHASE) [MASS=30108]	gi|15607992|ref|NP_215367.1|	0	0	7	7.84	7	7.84
116	Rv0853c	Pdc	PROBABLE PYRUVATE OR INDOLE-3-PYRUVATE DECARBOXYLASE PDC [MASS=59783]	gi|15607993|ref|NP_215368.1|	0	0	5	5.6	5	5.6
117	Rv0860	FadB	PROBABLE FATTY OXIDATION PROTEIN FADB [MASS=76104]	gi|15608000|ref|NP_215375.1|	30	27	5	5.6	35	32.6
118	Rv0863	Rv0863	hypothetical protein Rv0863 [MASS=10111]	gi|15608003|ref|NP_215378.1|	3	2.7	0	0	3	2.7
119	Rv0867c	RpfA	POSSIBLE RESUSCITATION-PROMOTING FACTOR RPFA [MASS=39974]	gi|15608007|ref|NP_215382.1|	0	0	6	6.72	6	6.72
120	Rv0869c	MoaA2	molybdenum cofactor biosynthesis protein A [MASS=38985]	gi|15608009|ref|NP_215384.1|	2	1.8	0	0	2	1.8
121	Rv0872c	PE_PGRS15	PE-PGRS FAMILY PROTEIN [MASS=50267]	gi|57116793|ref|YP_177763.1|	9	8.1	10	11.2	19	19.3
122	Rv0886	FprB	PROBABLE NADPH:ADRENODOXIN OXIDOREDUCTASE FPRB (ADRENODOXIN REDUCTASE) (AR) (FERREDOXIN-NADP(+) REDUCTASE) [MASS=61337]	gi|15608026|ref|NP_215401.1|	0	0	3	3.36	3	3.36
123	Rv0890c	Rv0890c	PROBABLE TRANSCRIPTIONAL REGULATORY PROTEIN (PROBABLY LUXR-FAMILY) [MASS=94496]	gi|15608030|ref|NP_215405.1|	0	0	9	10.08	9	10.08
124	Rv0892	Rv0892	PROBABLE MONOOXYGENASE [MASS=55039]	gi|15608032|ref|NP_215407.1|	0	0	13	14.56	13	14.56
125	Rv0897c	Rv0897c	PROBABLE OXIDOREDUCTASE [MASS=56234]	gi|15608037|ref|NP_215412.1|	3	2.7	0	0	3	2.7
126	Rv0905	EchA6	enoyl-CoA hydratase [MASS=26029]	gi|15608045|ref|NP_215420.1|	4	3.6	0	0	4	3.6
127	Rv0908	CtpE	PROBABLE METAL CATION TRANSPORTER ATPASE P-TYPE CTPE [MASS=84973]	gi|15608048|ref|NP_215423.1|	3	2.7	0	0	3	2.7
128	Rv0917	BetP	POSSIBLE GLYCINE BETAINE TRANSPORT INTEGRAL MEMBRANE PROTEIN BETP [MASS=63868]	gi|15608057|ref|NP_215432.1|	3	2.7	0	0	3	2.7
129	Rv0922	Rv0922	POSSIBLE TRANSPOSASE [MASS=59629]	gi|15608062|ref|NP_215437.1|	3	2.7	0	0	3	2.7
130	Rv0928	PstS3	PERIPLASMIC PHOSPHATE-BINDING LIPOPROTEIN PSTS3 (PBP-3) (PSTS3) (PHOS1) [MASS=37953]	gi|57116798|ref|YP_177768.1|	0	0	2	2.24	2	2.24
131	Rv0934	PstS1	PERIPLASMIC PHOSPHATE-BINDING LIPOPROTEIN PSTS1 (PBP-1) (PSTS1) [MASS=38243]	gi|57116801|ref|YP_177770.1|	0	0	8	8.96	8	8.96
132	Rv0939	Rv0939	POSSIBLE BIFUNCTIONAL ENZYME: 2-HYDROXYHEPTA-2,4-DIENE-1,7-DIOATE ISOMERASE (HHDD ISOMERASE) + CYCLASE/DEHYDRASE [MASS=69353]	gi|15608079|ref|NP_215454.1|	0	0	5	5.6	5	5.6
133	Rv0940c	Rv0940c	POSSIBLE OXIDOREDUCTASE [MASS=31788]	gi|15608080|ref|NP_215455.1|	3	2.7	4	4.48	7	7.18
134	Rv0952	SucD	succinyl-CoA synthetase subunit alpha [MASS=31229]	gi|15608092|ref|NP_215467.1|	0	0	5	5.6	5	5.6
135	Rv0955	Rv0955	PROBABLE CONSERVED INTEGRAL MEMBRANE PROTEIN [MASS=46088]	gi|15608095|ref|NP_215470.1|	3	2.7	0	0	3	2.7
136	Rv0957	PurH	bifunctional phosphoribosylaminoimidazolecarboxamide formyltransferase/IMP cyclohydrolase [MASS=55026]	gi|15608097|ref|NP_215472.1|	0	0	5	5.6	5	5.6
137	Rv0969	CtpV	PROBABLE METAL CATION TRANSPORTER P-TYPE ATPASE CTPV [MASS=80102]	gi|15608109|ref|NP_215484.1|	3	2.7	2	2.24	5	4.94
138	Rv0971c	EchA7	enoyl-CoA hydratase [MASS=27604]	gi|15608111|ref|NP_215486.1|	3	2.7	0	0	3	2.7
139	Rv0974c	AccD2	PROBABLE ACETYL-/PROPIONYL-CoA CARBOXYLASE (BETA SUBUNIT) ACCD2 [MASS=56256]	gi|15608114|ref|NP_215489.1|	0	0	8	8.96	8	8.96
140	Rv0978c	PE_PGRS17	PE-PGRS FAMILY PROTEIN [MASS=31019]	gi|57116806|ref|YP_177774.1|	0	0	3	3.36	3	3.36
141	Rv0982	MprB	PROBABLE TWO COMPONENT SENSOR KINASE MPRB [MASS=54407]	gi|15608122|ref|NP_215497.1|	0	0	2	2.24	2	2.24
142	Rv0993	GalU	PROBABLE UTP--GLUCOSE-1-PHOSPHATE URIDYLYLTRANSFERASE GALU (UDP-GLUCOSE PYROPHOSPHORYLASE) (UDPGP) (ALPHA-D-GLUCOSYL-1-PHOSPHATE URIDYLYLTRANSFERASE) (URIDINE DIPHOSPHOGLUCOSE PYROPHOSPHORYLASE) [MASS=32378]	gi|15608133|ref|NP_215508.1|	2	1.8	0	0	2	1.8
143	Rv0994	MoeA1	PROBABLE MOLYBDOPTERIN BIOSYNTHESIS PROTEIN MOEA1 [MASS=44337]	gi|57116810|ref|YP_177776.1|	0	0	4	4.48	4	4.48
144	Rv1009	RpfB	Probable resuscitation-promoting factor rpfB [MASS=38078]	gi|15608149|ref|NP_215525.1|	4	3.6	0	0	4	3.6
145	Rv1018c	GlmU	Probable UDP-N-acetylglucosamine pyrophosphorylase glmU [MASS=51584]	gi|15608158|ref|NP_215534.1|	3	2.7	3	3.36	6	6.06
146	Rv1020	Mfd	PROBABLE TRANSCRIPTION-REPAIR COUPLING FACTOR MFD (TRCF) [MASS=132907]	gi|15608160|ref|NP_215536.1|	10	9	0	0	10	9
147	Rv1023	Eno	phosphopyruvate hydratase [MASS=44961]	gi|15608163|ref|NP_215539.1|	4	3.6	0	0	4	3.6
148	Rv1026	Rv1026	hypothetical protein Rv1026 [MASS=33663]	gi|15608166|ref|NP_215542.1|	0	0	2	2.24	2	2.24
149	Rv1039c	PPE15	PPE FAMILY PROTEIN [MASS=38081]	gi|57116813|ref|YP_177778.1|	0	0	6	6.72	6	6.72
150	Rv1045	Rv1045	hypothetical protein Rv1045 [MASS=31990]	gi|15608185|ref|NP_215561.1|	3	2.7	0	0	3	2.7
151	Rv1057	Rv1057	hypothetical protein Rv1057 [MASS=40710]	gi|15608197|ref|NP_215573.1|	0	0	4	4.48	4	4.48
152	Rv1067c	PE_PGRS19	PE-PGRS FAMILY PROTEIN [MASS=54724]	gi|57116818|ref|YP_177780.1|	8	7.2	14	15.68	22	22.88
153	Rv1069c	Rv1069c	hypothetical protein Rv1069c [MASS=64341]	gi|15608209|ref|NP_215585.1|	0	0	7	7.84	7	7.84
154	Rv1084	Rv1084	hypothetical protein Rv1084 [MASS=71050]	gi|15608224|ref|NP_215600.1|	0	0	3	3.36	3	3.36
155	Rv1087	PE_PGRS21	PE-PGRS FAMILY PROTEIN [MASS=62469]	gi|57116821|ref|YP_177783.1|	0	0	9	10.08	9	10.08
156	Rv1088	PE9	PE FAMILY PROTEIN [MASS=15376]	gi|57116823|ref|YP_177784.1|	0	0	6	6.72	6	6.72
157	Rv1091	PE_PGRS22	PE-PGRS FAMILY PROTEIN [MASS=68316]	gi|57116826|ref|YP_177786.1|	6	5.4	4	4.48	10	9.88
158	Rv1097c	Rv1097c	PROBABLE MEMBRANE GLYCINE AND PROLINE RICH PROTEIN [MASS=29873]	gi|15608237|ref|NP_215613.1|	0	0	5	5.6	5	5.6
159	Rv1101c	Rv1101c	hypothetical protein Rv1101c [MASS=41716]	gi|15608241|ref|NP_215617.1|	0	0	4	4.48	4	4.48
160	Rv1106c	Rv1106c	PROBABLE CHOLESTEROL DEHYDROGENASE [MASS=40741]	gi|15608246|ref|NP_215622.1|	0	0	3	3.36	3	3.36
161	Rv1128c	Rv1128c	hypothetical protein Rv1128c [MASS=49274]	gi|15608268|ref|NP_215644.1|	3	2.7	0	0	3	2.7
162	Rv1132	Rv1132	hypothetical protein Rv1132 [MASS=64019]	gi|15608272|ref|NP_215648.1|	0	0	4	4.48	4	4.48
163	Rv1147	Rv1147	hypothetical protein Rv1147 [MASS=23405]	gi|15608287|ref|NP_215663.1|	0	0	2	2.24	2	2.24
164	Rv1151c	Rv1151c	NAD-dependent deacetylase [MASS=25661]	gi|15608291|ref|NP_215667.1|	0	0	5	5.6	5	5.6
165	Rv1157c	Rv1157c	CONSERVED HYPOTHETICAL ALA-, PRO-RICH PROTEIN [MASS=36480]	gi|15608297|ref|NP_215673.1|	0	0	4	4.48	4	4.48
166	Rv1159	Rv1159	mannosyltransferase [MASS=47102]	gi|15608299|ref|NP_215675.1|	4	3.6	0	0	4	3.6
167	Rv1161	NarG	PROBABLE RESPIRATORY NITRATE REDUCTASE (ALPHA CHAIN) NARG [MASS=136955]	gi|15608301|ref|NP_215677.1|	4	3.6	7	7.84	11	11.44
168	Rv1162	NarH	PROBABLE RESPIRATORY NITRATE REDUCTASE (BETA CHAIN) NARH [MASS=62037]	gi|15608302|ref|NP_215678.1|	4	3.6	9	10.08	13	13.68
169	Rv1166	LpqW	PROBABLE CONSERVED LIPOPROTEIN LPQW [MASS=66130]	gi|15608306|ref|NP_215682.1|	0	0	7	7.84	7	7.84
170	Rv1181	Pks4	PROBABLE POLYKETIDE BETA-KETOACYL SYNTHASE PKS4 [MASS=168115]	gi|15608321|ref|NP_215697.1|	6	5.4	6	6.72	12	12.12
171	Rv1182	PapA3	PROBABLE CONSERVED POLYKETIDE SYNTHASE ASSOCIATED PROTEIN PAPA3 [MASS=51575]	gi|15608322|ref|NP_215698.1|	0	0	5	5.6	5	5.6
172	Rv1183	MmpL10	PROBABLE CONSERVED TRANSMEMBRANE TRANSPORT PROTEIN MMPL10 [MASS=106414]	gi|15608323|ref|NP_215699.1|	5	4.5	0	0	5	4.5
173	Rv1192	Rv1192	hypothetical protein Rv1192 [MASS=30213]	gi|15608332|ref|NP_215708.1|	3	2.7	0	0	3	2.7
174	Rv1196	PPE18	PPE FAMILY PROTEIN [MASS=39158]	gi|57116841|ref|YP_177795.1|	0	0	12	13.44	12	13.44
175	Rv1214c	PE14	PE FAMILY PROTEIN [MASS=10846]	gi|57116843|ref|YP_177797.1|	0	0	4	4.48	4	4.48
176	Rv1223	HtrA	PROBABLE SERINE PROTEASE HTRA (DEGP PROTEIN) [MASS=54189]	gi|57116844|ref|NP_215739.2|	0	0	4	4.48	4	4.48
177	Rv1230c	Rv1230c	POSSIBLE MEMBRANE PROTEIN [MASS=41417]	gi|15608370|ref|NP_215746.1|	0	0	8	8.96	8	8.96
178	Rv1235	LpqY	PROBABLE SUGAR-BINDING LIPOPROTEIN LPQY [MASS=49793]	gi|15608375|ref|NP_215751.1|	0	0	7	7.84	7	7.84
179	Rv1243c	PE_PGRS23	PE-PGRS FAMILY PROTEIN [MASS=47285]	gi|57116845|ref|YP_177798.1|	6	5.4	0	0	6	5.4
180	Rv1248c	SucA	alpha-ketoglutarate decarboxylase [MASS=135901]	gi|161352467|ref|NP_215764.2|	4	3.6	0	0	4	3.6
181	Rv1251c	Rv1251c	hypothetical protein Rv1251c [MASS=123148]	gi|15608391|ref|NP_215767.1|	0	0	3	3.36	3	3.36
182	Rv1259	Rv1259	hypothetical protein Rv1259 [MASS=31783]	gi|15608399|ref|NP_215775.1|	0	0	2	2.24	2	2.24
183	Rv1264	Rv1264	ADENYLYL CYCLASE (ATP PYROPHOSPHATE-LYASE) (ADENYLATE CYCLASE) [MASS=42232]	gi|15608404|ref|NP_215780.1|	3	2.7	0	0	3	2.7
184	Rv1266c	PknH	PROBABLE TRANSMEMBRANE SERINE/THREONINE-PROTEIN KINASE H PKNH (PROTEIN KINASE H) (STPK H) [MASS=66753]	gi|15608406|ref|NP_215782.1|	0	0	10	11.2	10	11.2
185	Rv1267c	EmbR	PROBABLE TRANSCRIPTIONAL REGULATORY PROTEIN EMBR [MASS=41933]	gi|15608407|ref|NP_215783.1|	3	2.7	0	0	3	2.7
186	Rv1270c	LprA	POSSIBLE LIPOPROTEIN LPRA [MASS=24874]	gi|15608410|ref|NP_215786.1|	2	1.8	0	0	2	1.8
187	Rv1275	LprC	POSSIBLE LIPOPROTEIN LPRC [MASS=18871]	gi|15608415|ref|NP_215791.1|	3	2.7	8	8.96	11	11.66
188	Rv1281c	OppD	PROBABLE OLIGOPEPTIDE-TRANSPORT ATP-BINDING PROTEIN ABC TRANSPORTER OPPD [MASS=65293]	gi|15608421|ref|NP_215797.1|	2	1.8	0	0	2	1.8
189	Rv1325c	PE_PGRS24	PE-PGRS FAMILY PROTEIN [MASS=49574]	gi|57116848|ref|YP_177799.1|	11	9.9	9	10.08	20	19.98
190	Rv1327c	GlgE	PROBABLE GLUCANASE GLGE [MASS=78639]	gi|57116849|ref|NP_215843.2|	5	4.5	0	0	5	4.5
191	Rv1337	Rv1337	PROBABLE INTEGRAL MEMBRANE PROTEIN [MASS=25702]	gi|15608477|ref|NP_215853.1|	0	0	4	4.48	4	4.48
192	Rv1338	MurI	glutamate racemase [MASS=28643]	gi|15608478|ref|NP_215854.1|	2	1.8	0	0	2	1.8
193	Rv1346	FadE14	POSSIBLE ACYL-CoA DEHYDROGENASE FADE14 [MASS=41180]	gi|15608486|ref|NP_215862.1|	2	1.8	0	0	2	1.8
194	Rv1349	Rv1349	PROBABLE DRUGS-TRANSPORT TRANSMEMBRANE ATP-BINDING PROTEIN ABC TRANSPORTER [MASS=60954]	gi|15608489|ref|NP_215865.1|	3	2.7	3	3.36	6	6.06
195	Rv1354c	Rv1354c	hypothetical protein Rv1354c [MASS=67653]	gi|15608494|ref|NP_215870.1|	13	11.7	3	3.36	16	15.06
196	Rv1360	Rv1360	PROBABLE OXIDOREDUCTASE [MASS=37252]	gi|15608500|ref|NP_215876.1|	21	18.9	10	11.2	31	30.1
197	Rv1361c	PPE19	PPE FAMILY PROTEIN [MASS=40015]	gi|57116852|ref|YP_177801.1|	0	0	7	7.84	7	7.84
198	Rv1362c	Rv1362c	POSSIBLE MEMBRANE PROTEIN [MASS=23503]	gi|15608502|ref|NP_215878.1|	0	0	3	3.36	3	3.36
199	Rv1372	Rv1372	hypothetical protein Rv1372 [MASS=42032]	gi|57116854|ref|YP_177803.1|	2	1.8	0	0	2	1.8
200	Rv1384	CarB	carbamoyl phosphate synthase large subunit [MASS=118960]	gi|57116856|ref|YP_177804.1|	7	6.3	5	5.6	12	11.9
201	Rv1437	Pgk	phosphoglycerate kinase [MASS=42512]	gi|15608575|ref|NP_215953.1|	0	0	5	5.6	5	5.6
202	Rv1454c	Qor	PROBABLE QUINONE REDUCTASE QOR (NADPH:quinone reductase) (Zeta-crystallin homolog protein) [MASS=34046]	gi|15608592|ref|NP_215970.1|	0	0	5	5.6	5	5.6
203	Rv1459c	Rv1459c	POSSIBLE CONSERVED INTEGRAL MEMBRANE PROTEIN [MASS=62693]	gi|15608597|ref|NP_215975.1|	2	1.8	0	0	2	1.8
204	Rv1468c	PE_PGRS29	PE-PGRS FAMILY PROTEIN [MASS=32215]	gi|57116869|ref|YP_177814.1|	3	2.7	3	3.36	6	6.06
205	Rv1469	CtpD	PROBABLE CATION TRANSPORTER P-TYPE ATPASE D CTPD [MASS=67884]	gi|15608607|ref|NP_215985.1|	3	2.7	0	0	3	2.7
206	Rv1475c	Acn	aconitate hydratase [MASS=102448]	gi|15608613|ref|NP_215991.1|	4	3.6	0	0	4	3.6
207	Rv1484	InhA	enoyl-(acyl carrier protein) reductase [MASS=28528]	gi|15608622|ref|NP_216000.1|	2	1.8	3	3.36	5	5.16
208	Rv1490	Rv1490	PROBABLE MEMBRANE PROTEIN [MASS=48150]	gi|15608628|ref|NP_216006.1|	2	1.8	0	0	2	1.8
209	Rv1493	MutB	methylmalonyl-CoA mutase [MASS=80604]	gi|15608631|ref|NP_216009.1|	0	0	4	4.48	4	4.48
210	Rv1508c	Rv1508c	Probable membrane protein [MASS=63889]	gi|15608646|ref|NP_216024.1|	4	3.6	0	0	4	3.6
211	Rv1510	Rv1510	conserved probable membrane protein [MASS=44293]	gi|15608648|ref|NP_216026.1|	3	2.7	0	0	3	2.7
212	Rv1514c	Rv1514c	hypothetical protein Rv1514c [MASS=28965]	gi|15608652|ref|NP_216030.1|	0	0	5	5.6	5	5.6
213	Rv1518	Rv1518	hypothetical protein Rv1518 [MASS=36089]	gi|15608656|ref|NP_216034.1|	6	5.4	0	0	6	5.4
214	Rv1522c	MmpL12	PROBABLE CONSERVED TRANSMEMBRANE TRANSPORT PROTEIN MMPL12 [MASS=122429]	gi|15608660|ref|NP_216038.1|	4	3.6	3	3.36	7	6.96
215	Rv1523	Rv1523	Probable methyltransferase [MASS=37915]	gi|15608661|ref|NP_216039.1|	0	0	4	4.48	4	4.48
216	Rv1524	Rv1524	Probable glycosyltransferase [MASS=44362]	gi|15608662|ref|NP_216040.1|	0	0	6	6.72	6	6.72
217	Rv1527c	Pks5	Probable polyketide synthase pks5 [MASS=223887]	gi|15608665|ref|NP_216043.1|	13	11.7	4	4.48	17	16.18
218	Rv1528c	PapA4	PROBABLE CONSERVED POLYKETIDE SYNTHASE ASSOCIATED PROTEIN PAPA4 [MASS=18076]	gi|15608666|ref|NP_216044.1|	8	7.2	0	0	8	7.2
219	Rv1547	DnaE1	DNA polymerase III subunit alpha [MASS=129322]	gi|15608685|ref|NP_216063.1|	7	6.3	0	0	7	6.3
220	Rv1548c	PPE21	PPE FAMILY PROTEIN [MASS=66736]	gi|57116882|ref|YP_177817.1|	2	1.8	0	0	2	1.8
221	Rv1557	MmpL6	PROBABLE CONSERVED TRANSMEMBRANE TRANSPORT PROTEIN MMPL6 [MASS=42421]	gi|15608695|ref|NP_216073.1|	6	5.4	0	0	6	5.4
222	Rv1562c	TreZ	Maltooligosyltrehalose trehalohydrolase TreZ [MASS=64076]	gi|57116884|ref|YP_177819.1|	3	2.7	0	0	3	2.7
223	Rv1563c	TreY	Maltooligosyltrehalose synthase TreY [MASS=82706]	gi|57116885|ref|YP_177820.1|	3	2.7	0	0	3	2.7
224	Rv1565c	Rv1565c	hypothetical protein Rv1565c [MASS=80162]	gi|15608703|ref|NP_216081.1|	0	0	3	3.36	3	3.36
225	Rv1567c	Rv1567c	Probable hypothetical membrane protein [MASS=10362]	gi|15608705|ref|NP_216083.1|	0	0	4	4.48	4	4.48
226	Rv1568	BioA	adenosylmethionine--8-amino-7-oxononanoate transaminase [MASS=46319]	gi|15608706|ref|NP_216084.1|	6	5.4	0	0	6	5.4
227	Rv1570	BioD	dithiobiotin synthetase [MASS=22456]	gi|15608708|ref|NP_216086.1|	0	0	3	3.36	3	3.36
228	Rv1582c	Rv1582c	Probable phiRv1 phage protein [MASS=52401]	gi|15608720|ref|NP_216098.1|	4	3.6	0	0	4	3.6
229	Rv1610	Rv1610	POSSIBLE CONSERVED MEMBRANE PROTEIN [MASS=24618]	gi|15608748|ref|NP_216126.1|	2	1.8	0	0	2	1.8
230	Rv1613	TrpA	tryptophan synthase subunit alpha [MASS=27727]	gi|15608751|ref|NP_216129.1|	0	0	8	8.96	8	8.96
231	Rv1625c	Cya	MEMBRANE-ANCHORED ADENYLYL CYCLASE CYA (ATP PYROPHOSPHATE-LYASE) (ADENYLATE CYCLASE) [MASS=47369]	gi|57116894|ref|NP_216141.2|	0	0	3	3.36	3	3.36
232	Rv1639c	Rv1639c	hypothetical protein Rv1639c [MASS=51791]	gi|15608777|ref|NP_216155.1|		0	6	6.72	6	6.72
233	Rv1651c	PE_PGRS30	PE-PGRS FAMILY PROTEIN [MASS=88454]	gi|57116897|ref|YP_177826.1|	8	7.2	4	4.48	12	11.68
234	Rv1661	Pks7	Probable polyketide synthase pks7 [MASS=221045]	gi|15608799|ref|NP_216177.1|	14	12.6	3	3.36	17	15.96
235	Rv1662	Pks8	Probable polyketide synthase pks8 [MASS=167095]	gi|15608800|ref|NP_216178.1|	8	7.2	0	0	8	7.2
236	Rv1663	Pks17	Probable polyketide synthase pks17 [MASS=53524]	gi|15608801|ref|NP_216179.1|	0	0	3	3.36	3	3.36
237	Rv1664	Pks9	Probable polyketide synthase pks9 [MASS=106402]	gi|15608802|ref|NP_216180.1|	8	7.2	0	0	8	7.2
238	Rv1679	FadE16	POSSIBLE ACYL-CoA DEHYDROGENASE FADE16 [MASS=37876]	gi|15608817|ref|NP_216195.1|	0	0	6	6.72	6	6.72
239	Rv1700	Rv1700	hypothetical protein Rv1700 [MASS=22893]	gi|15608838|ref|NP_216216.1|	3	2.7	0	0	3	2.7
240	Rv1705c	PPE22	PPE FAMILY PROTEIN [MASS=38443]	gi|57116898|ref|YP_177827.1|	3	2.7	0	0	3	2.7
241	Rv1706c	PPE23	PPE FAMILY PROTEIN [MASS=39778]	gi|57116899|ref|YP_177828.1|	0	0	8	8.96	8	8.96
242	Rv1707	Rv1707	PROBABLE CONSERVED TRANSMEMBRANE PROTEIN [MASS=51203]	gi|15608845|ref|NP_216223.1|	3	2.7	0	0	3	2.7
243	Rv1723	Rv1723	PROBABLE HYDROLASE [MASS=43630]	gi|15608861|ref|NP_216239.1|	0	0	5	5.6	5	5.6
244	Rv1736	NarX	PROBABLE NITRATE REDUCTASE NARX [MASS=72825]	gi|15608874|ref|NP_216252.1|	0	0	11	12.32	11	12.32
245	Rv1737c	NarK2	POSSIBLE NITRATE/NITRITE TRANSPORTER NARK2 [MASS=41109]	gi|15608875|ref|NP_216253.1|	3	2.7	5	5.6	8	8.3
246	Rv1746	PknF	ANCHORED-MEMBRANE SERINE/THREONINE-PROTEIN KINASE PKNF (PROTEIN KINASE F) (STPK F) [MASS=50668]	gi|15608884|ref|NP_216262.1|	0	0	3	3.36	3	3.36
247	Rv1747	Rv1747	PROBABLE CONSERVED TRANSMEMBRANE ATP-BINDING PROTEIN ABC TRANSPORTER [MASS=92153]	gi|15608885|ref|NP_216263.1|	6	5.4	0	0	6	5.4
248	Rv1753c	PPE24	PPE FAMILY PROTEIN [MASS=104649]	gi|57116904|ref|YP_177830.1|	0	0	5	5.6	5	5.6
249	Rv1758	Cut1	PROBABLE CUTINASE CUT1 [MASS=17868]	gi|15608896|ref|NP_216274.1|	0	0	6	6.72	6	6.72
250	Rv1759c	Wag22	PE-PGRS FAMILY PROTEIN [MASS=74353]	gi|57116905|ref|YP_177831.1|	8	7.2	13	14.56	21	21.76
251	Rv1768	PE_PGRS31	PE-PGRS FAMILY PROTEIN [MASS=51962]	gi|57116908|ref|YP_177832.1|	6	5.4	5	5.6	11	11
252	Rv1784	Rv1784	hypothetical protein Rv1784 [MASS=101467]	gi|15608922|ref|NP_216300.1|	0	0	4	4.48	4	4.48
253	Rv1790	PPE27	PPE FAMILY PROTEIN [MASS=35459]	gi|57116912|ref|YP_177836.1|	0	0	11	12.32	11	12.32
254	Rv1795	Rv1795	hypothetical protein Rv1795 [MASS=53435]	gi|15608932|ref|NP_216311.1|	0	0	6	6.72	6	6.72
255	Rv1796	MycP5	PROBABLE PROLINE RICH MEMBRANE-ANCHORED MYCOSIN MYCP5 (SERINE PROTEASE) (SUBTILISIN-LIKE PROTEASE) (SUBTILASE-LIKE) (MYCOSIN-5) [MASS=60027]	gi|15608933|ref|NP_216312.1|	4	3.6	0	0	4	3.6
256	Rv1797	Rv1797	hypothetical protein Rv1797 [MASS=44178]	gi|15608934|ref|NP_216313.1|	6	5.4	0	0	6	5.4
257	Rv1798	Rv1798	hypothetical protein Rv1798 [MASS=67756]	gi|15608935|ref|NP_216314.1|	0	0	8	8.96	8	8.96
258	Rv1802	PPE30	PPE FAMILY PROTEIN [MASS=46021]	gi|57116917|ref|YP_177841.1|	4	3.6	8	8.96	12	12.56
259	Rv1803c	PE_PGRS32	PE-PGRS FAMILY PROTEIN [MASS=54881]	gi|57116918|ref|YP_177842.1|	4	3.6	5	5.6	9	9.2
260	Rv1809	PPE33	PPE FAMILY PROTEIN [MASS=47156]	gi|57116922|ref|YP_177845.1|	0	0	5	5.6	5	5.6
261	Rv1820	IlvG	hypothetical protein Rv1820 [MASS=57520]	gi|15608957|ref|NP_216336.1|	6	5.4	0	0	6	5.4
262	Rv1832	GcvB	glycine dehydrogenase [MASS=99510]	gi|15608969|ref|NP_216348.1|	0	0	4	4.48	4	4.48
263	Rv1836c	Rv1836c	hypothetical protein Rv1836c [MASS=69676]	gi|15608973|ref|NP_216352.1|	0	0	12	13.44	12	13.44
264	Rv1837c	GlcB	malate synthase G [MASS=80402]	gi|15608974|ref|NP_216353.1|	7	6.3	4	4.48	11	10.78
265	Rv1844c	Gnd1	6-phosphogluconate dehydrogenase [MASS=51547]	gi|57116925|ref|YP_177848.1|	3	2.7	2	2.24	5	4.94
266	Rv1854c	Ndh	PROBABLE NADH DEHYDROGENASE NDH [MASS=49619]	gi|15608991|ref|NP_216370.1|	3	2.7	0	0	3	2.7
267	Rv1857	ModA	PROBABLE MOLYBDATE-BINDING LIPOPROTEIN MODA [MASS=26576]	gi|15608994|ref|NP_216373.1|	4	3.6	3	3.36	7	6.96
268	Rv1867	Rv1867	acetyl-CoA acetyltransferase [MASS=53560]	gi|15609004|ref|NP_216383.1|	0	0	2	2.24	2	2.24
269	Rv1871c	Rv1871c	hypothetical protein Rv1871c [MASS=14681]	gi|15609008|ref|NP_216387.1|	3	2.7	0	0	3	2.7
270	Rv1877	Rv1877	PROBABLE CONSERVED INTEGRAL MEMBRANE PROTEIN [MASS=72353]	gi|15609014|ref|NP_216393.1|	3	2.7	0	0	3	2.7
271	Rv1878	GlnA3	PROBABLE GLUTAMINE SYNTHETASE GLNA3 (GLUTAMINE SYNTHASE) (GS-I) [MASS=46720]	gi|15609015|ref|NP_216394.1|	0	0	3	3.36	3	3.36
272	Rv1884c	RpfC	PROBABLE RESUSCITATION-PROMOTING FACTOR RPFC [MASS=18046]	gi|15609021|ref|NP_216400.1|	2	1.8	0	0	2	1.8
273	Rv1891	Rv1891	hypothetical protein Rv1891 [MASS=14109]	gi|15609028|ref|NP_216407.1|	0	0	6	6.72	6	6.72
274	Rv1899c	LppD	POSSIBLE LIPOPROTEIN LPPD [MASS=35072]	gi|15609036|ref|NP_216415.1|	0	0	2	2.24	2	2.24
275	Rv1915	AceAa	PROBABLE ISOCITRATE LYASE aceAa [FIRST PART] (ISOCITRASE) (ISOCITRATASE) (ICL) [MASS=40490]	gi|15609052|ref|NP_216431.1|	2	1.8	0	0	2	1.8
276	Rv1917c	PPE34	PPE FAMILY PROTEIN [MASS=142943]	gi|57116928|ref|YP_177655.1|	4	3.6	11	12.32	15	15.92
277	Rv1918c	PPE35	PPE FAMILY PROTEIN [MASS=97950]	gi|57116929|ref|YP_177850.1|	4	3.6	4	4.48	8	8.08
278	Rv1935c	EchA13	enoyl-CoA hydratase [MASS=35250]	gi|15609072|ref|NP_216451.1|	3	2.7	0	0	3	2.7
279	Rv1938	EphB	PROBABLE EPOXIDE HYDROLASE EPHB (EPOXIDE HYDRATASE) [MASS=39297]	gi|15609075|ref|NP_216454.1|	0	0	3	3.36	3	3.36
280	Rv1944c	Rv1944c	hypothetical protein Rv1944c [MASS=20795]	gi|15609081|ref|NP_216460.1|	0	0	5	5.6	5	5.6
281	Rv1965	YrbE3B	CONSERVED HYPOTHETICAL INTEGRAL MEMBRANE PROTEIN YRBE3B [MASS=28144]	gi|15609102|ref|NP_216481.1|	0	0	7	7.84	7	7.84
282	Rv1983	PE_PGRS35	PE-PGRS FAMILY PROTEIN [MASS=53737]	gi|57116933|ref|YP_177854.1|	0	0	3	3.36	3	3.36
283	Rv1985c	Rv1985c	chromosome replication initiation inhibitor protein [MASS=32837]	gi|15609122|ref|NP_216501.1|	0	0	3	3.36	3	3.36
284	Rv1992c	CtpG	PROBABLE METAL CATION TRANSPORTER P-TYPE ATPASE G CTPG [MASS=79309]	gi|15609129|ref|NP_216508.1|	0	0	6	6.72	6	6.72
285	Rv1997	CtpF	PROBABLE METAL CATION TRANSPORTER P-TYPE ATPASE A CTPF [MASS=95032]	gi|15609134|ref|NP_216513.1|	0	0	3	3.36	3	3.36
286	Rv2000	Rv2000	hypothetical protein Rv2000 [MASS=59894]	gi|15609137|ref|NP_216516.1|	5	4.5	0	0	5	4.5
287	Rv2006	OtsB1	PROBABLE TREHALOSE-6-PHOSPHATE PHOSPHATASE OTSB1 (TREHALOSE-PHOSPHATASE) (TPP) [MASS=145783]	gi|57116935|ref|YP_177855.1|	4	3.6	0	0	4	3.6
288	Rv2007c	FdxA	PROBABLE FERREDOXIN FDXA [MASS=12064]	gi|15609144|ref|NP_216523.1|	0	0	3	3.36	3	3.36
289	Rv2008c	Rv2008c	hypothetical protein Rv2008c [MASS=48392]	gi|15609145|ref|NP_216524.1|	0	0	2	2.24	2	2.24
290	Rv2010	Rv2010	hypothetical protein Rv2010 [MASS=14731]	gi|15609147|ref|NP_216526.1|	2	1.8	0	0	2	1.8
291	Rv2017	Rv2017	POSSIBLE TRANSCRIPTIONAL REGULATORY PROTEIN [MASS=38605]	gi|15609154|ref|NP_216533.1|	3	2.7	0	0	3	2.7
292	Rv2024c	Rv2024c	hypothetical protein Rv2024c [MASS=57274]	gi|15609161|ref|NP_216540.1|	3	2.7	0	0	3	2.7
293	Rv2038c	Rv2038c	Probable sugar-transport ATP-binding protein ABC transporter [MASS=38887]	gi|15609175|ref|NP_216554.1|	2	1.8	0	0	2	1.8
294	Rv2046	LppI	Probable lipoprotein lppI [MASS=22202]	gi|15609183|ref|NP_216562.1|	0	0	5	5.6	5	5.6
295	Rv2047c	Rv2047c	hypothetical protein Rv2047c [MASS=91384]	gi|15609184|ref|NP_216563.1|	0	0	4	4.48	4	4.48
296	Rv2051c	Ppm1	Polyprenol-monophosphomannose synthase Ppm1 [MASS=93824]	gi|15609188|ref|NP_216567.1|	2	1.8	0	0	2	1.8
297	Rv2075c	Rv2075c	Possible hypothetical exported or envelope protein [MASS=51580]	gi|15609212|ref|NP_216591.1|	3	2.7	0	0	3	2.7
298	Rv2079	Rv2079	hypothetical protein Rv2079 [MASS=69823]	gi|15609216|ref|NP_216595.1|	0	0	6	6.72	6	6.72
299	Rv2082	Rv2082	hypothetical protein Rv2082 [MASS=73564]	gi|15609219|ref|NP_216598.1|	0	0	6	6.72	6	6.72
300	Rv2083	Rv2083	hypothetical protein Rv2083 [MASS=30773]	gi|15609220|ref|NP_216599.1|	0	0	10	11.2	10	11.2
301	Rv2088	PknJ	PROBABLE TRANSMEMBRANE SERINE/THREONINE-PROTEIN KINASE J PKNJ (PROTEIN KINASE J) (STPK J) [MASS=61595]	gi|15609225|ref|NP_216604.1|	5	4.5	0	0	5	4.5
302	Rv2110c	PrcB	proteasome (beta subunit) PrcB [MASS=30305]	gi|15609247|ref|NP_216626.1|	4	3.6	0	0	4	3.6
303	Rv2126c	PE_PGRS37	PE-PGRS FAMILY PROTEIN [MASS=20324]	gi|57116949|ref|YP_177862.1|	0	0	5	5.6	5	5.6
304	Rv2131c	CysQ	POSSIBLE MONOPHOSPHATASE CYSQ [MASS=28447]	gi|15609268|ref|NP_216647.1|	4	3.6	0	0	4	3.6
305	Rv2153c	MurG	N-acetylglucosaminyl transferase [MASS=41860]	gi|15609290|ref|NP_216669.1|	0	0	18	20.16	18	20.16
306	Rv2155c	MurD	UDP-N-acetylmuramoyl-L-alanyl-D-glutamate synthetase [MASS=49345]	gi|15609292|ref|NP_216671.1|	5	4.5	0	0	5	4.5
307	Rv2162c	PE_PGRS38	PE-PGRS FAMILY PROTEIN [MASS=44478]	gi|57116953|ref|YP_177865.1|	4	3.6	3	3.36	7	6.96
308	Rv2163c	PbpB	Probable penicillin-binding membrane protein pbpB [MASS=72536]	gi|15609300|ref|NP_216679.1|	5	4.5	3	3.36	8	7.86
309	Rv2186c	Rv2186c	hypothetical protein Rv2186c [MASS=14574]	gi|15609323|ref|NP_216702.1|	2	1.8	0	0	2	1.8
310	Rv2187	FadD15	Probable long-chain-fatty-acid-CoA ligase fadD15 (FATTY-ACID-CoA SYNTHETASE) (FATTY-ACID-CoA SYNTHASE) [MASS=64035]	gi|15609324|ref|NP_216703.1|	3	2.7	0	0	3	2.7
311	Rv2202c	CbhK	Probable carbohydrate kinase CbhK [MASS=34472]	gi|15609339|ref|NP_216718.1|	5	4.5	0	0	5	4.5
312	Rv2209	Rv2209	Probable conserved integral membrane protein [MASS=53579]	gi|15609346|ref|NP_216725.1|	31	27.9	0	0	31	27.9
313	Rv2213	PepB	leucyl aminopeptidase [MASS=53481]	gi|15609350|ref|NP_216729.1|	3	2.7	0	0	3	2.7
314	Rv2222c	GlnA2	PROBABLE GLUTAMINE SYNTHETASE GLNA2 (GLUTAMINE SYNTHASE) (GS-II) [MASS=49607]	gi|15609359|ref|NP_216738.1|	2	1.8	0	0	2	1.8
315	Rv2223c	Rv2223c	Probable exported protease [MASS=55077]	gi|15609360|ref|NP_216739.1|	5	4.5	0	0	5	4.5
316	Rv2239c	Rv2239c	hypothetical protein Rv2239c [MASS=16963]	gi|15609376|ref|NP_216755.1|	0	0	3	3.36	3	3.36
317	Rv2240c	Rv2240c	hypothetical protein Rv2240c [MASS=27529]	gi|15609377|ref|NP_216756.1|	4	3.6	0	0	4	3.6
318	Rv2241	AceE	pyruvate dehydrogenase subunit E1 [MASS=100216]	gi|15609378|ref|NP_216757.1|	3	2.7	0	0	3	2.7
319	Rv2243	FabD	acyl-carrier-protein S-malonyltransferase [MASS=30788]	gi|15609380|ref|NP_216759.1|	2	1.8	0	0	2	1.8
320	Rv2244	AcpM	acyl carrier protein [MASS=12524]	gi|15609381|ref|NP_216760.1|	0	0	106	118.72	106	118.72
321	Rv2245	KasA	3-oxoacyl-(acyl carrier protein) synthase II [MASS=43316]	gi|15609382|ref|NP_216761.1|	0	0	13	14.56	13	14.56
322	Rv2246	KasB	3-oxoacyl-(acyl carrier protein) synthase II [MASS=46420]	gi|15609383|ref|NP_216762.1|	0	0	6	6.72	6	6.72
323	Rv2247	AccD6	ACETYL/PROPIONYL-CoA CARBOXYLASE (BETA SUBUNIT) ACCD6 [MASS=50136]	gi|15609384|ref|NP_216763.1|	0	0	5	5.6	5	5.6
324	Rv2259	MscR	Probable zinc-dependent alcohol dehydrogenase AdhE2 [MASS=37888]	gi|15609396|ref|NP_216775.1|	5	4.5	0	0	5	4.5
325	Rv2277c	Rv2277c	Possible glycerolphosphodiesterase [MASS=32163]	gi|15609414|ref|NP_216793.1|	2	1.8	0	0	2	1.8
326	Rv2293c	Rv2293c	hypothetical protein Rv2293c [MASS=25255]	gi|15609430|ref|NP_216809.1|	9	8.1	7	7.84	16	15.94
327	Rv2301	Cut2	PROBABLE CUTINASE CUT2 [MASS=23926]	gi|57116961|ref|NP_216817.2|	0	0	4	4.48	4	4.48
328	Rv2314c	Rv2314c	hypothetical protein Rv2314c [MASS=48712]	gi|15609451|ref|NP_216830.1|	0	0	2	2.24	2	2.24
329	Rv2315c	Rv2315c	hypothetical protein Rv2315c [MASS=54578]	gi|15609452|ref|NP_216831.1|	30	27	21	23.52	51	50.52
330	Rv2323c	Rv2323c	hypothetical protein Rv2323c [MASS=32959]	gi|15609460|ref|NP_216839.1|	2	1.8	0	0	2	1.8
331	Rv2326c	Rv2326c	POSSIBLE TRANSMEMBRANE ATP-BINDING PROTEIN ABC TRANSORTER [MASS=72835]	gi|15609463|ref|NP_216842.1|	0	0	3	3.36	3	3.36
332	Rv2328	PE23	PE FAMILY PROTEIN [MASS=36832]	gi|57116969|ref|YP_177867.1|	0	0	9	10.08	9	10.08
333	Rv2331	Rv2331	hypothetical protein Rv2331 [MASS=13736]	gi|15609468|ref|NP_216847.1|	3	2.7	0	0	3	2.7
334	Rv2333c	Rv2333c	PROBABLE CONSERVED INTEGRAL MEMBRANE TRANSPORT PROTEIN [MASS=57115]	gi|15609470|ref|NP_216849.1|	0	0	4	4.48	4	4.48
335	Rv2340c	PE_PGRS39	PE-PGRS FAMILY PROTEIN [MASS=38722]	gi|57116973|ref|YP_177869.1|	0	0	7	7.84	7	7.84
336	Rv2349c	PlcC	PROBABLE PHOSPHOLIPASE C 3 PLCC [MASS=55047]	gi|15609486|ref|NP_216865.1|	5	4.5	4	4.48	9	8.98
337	Rv2351c	PlcA	PROBABLE MEMBRANE-ASSOCIATED PHOSPHOLIPASE C 1 PLCA (MTP40 ANTIGEN) [MASS=55381]	gi|15609488|ref|NP_216867.1|	0	0	3	3.36	3	3.36
338	Rv2352c	PPE38	PPE FAMILY PROTEIN [MASS=37355]	gi|57116974|ref|YP_177870.1|	0	0	43	48.16	43	48.16
339	Rv2363	AmiA2	amidase [MASS=50883]	gi|15609500|ref|NP_216879.1|	3	2.7	0	0	3	2.7
340	Rv2376c	Cfp2	LOW MOLECULAR WEIGHT ANTIGEN CFP2 (LOW MOLECULAR WEIGHT PROTEIN ANTIGEN 2) (CFP-2) [MASS=16635]	gi|15609513|ref|NP_216892.1|	0	0	5	5.6	5	5.6
341	Rv2381c	MbtD	POLYKETIDE SYNTHETASE MBTD (POLYKETIDE SYNTHASE) [MASS=105591]	gi|15609518|ref|NP_216897.1|	3	2.7	7	7.84	10	10.54
342	Rv2382c	MbtC	POLYKETIDE SYNTHETASE MBTC (POLYKETIDE SYNTHASE) [MASS=46624]	gi|15609519|ref|NP_216898.1|	4	3.6	0	0	4	3.6
343	Rv2383c	MbtB	PHENYLOXAZOLINE SYNTHASE MBTB (PHENYLOXAZOLINE SYNTHETASE) [MASS=151633]	gi|15609520|ref|NP_216899.1|	3	2.7	2	2.24	5	4.94
344	Rv2384	MbtA	BIFUNCTIONAL ENZYME MBTA: SALICYL-AMP LIGASE (SAL-AMP LIGASE) + SALICYL-S-ArCP SYNTHETASE [MASS=59280]	gi|15609521|ref|NP_216900.1|	2	1.8	5	5.6	7	7.4
345	Rv2395	Rv2395	PROBABLE CONSERVED INTEGRAL MEMBRANE PROTEIN [MASS=68251]	gi|15609532|ref|NP_216911.1|	4	3.6	0	0	4	3.6
346	Rv2404c	LepA	GTP-binding protein LepA [MASS=72395]	gi|15609541|ref|NP_216920.1|	9	8.1	0	0	9	8.1
347	Rv2414c	Rv2414c	hypothetical protein Rv2414c [MASS=52812]	gi|15609551|ref|NP_216930.1|	3	2.7	0	0	3	2.7
348	Rv2418c	Rv2418c	hypothetical protein Rv2418c [MASS=27225]	gi|15609555|ref|NP_216934.1|	3	2.7	0	0	3	2.7
349	Rv2425c	Rv2425c	hypothetical protein Rv2425c [MASS=52590]	gi|15609562|ref|NP_216941.1|	7	6.3	0	0	7	6.3
350	Rv2437	Rv2437	hypothetical protein Rv2437 [MASS=15315]	gi|15609574|ref|NP_216953.1|	0	0	4	4.48	4	4.48
351	Rv2444c	Rne	POSSIBLE RIBONUCLEASE E RNE [MASS=103390]	gi|15609581|ref|NP_216960.1|	2	1.8	0	0	2	1.8
352	Rv2447c	FolC	PROBABLE FOLYLPOLYGLUTAMATE SYNTHASE PROTEIN FOLC (FOLYLPOLY-GAMMA-GLUTAMATE SYNTHETASE) (FPGS) [MASS=50779]	gi|15609584|ref|NP_216963.1|	0	0	3	3.36	3	3.36
353	Rv2448c	ValS	valyl-tRNA synthetase [MASS=97820]	gi|15609585|ref|NP_216964.1|	0	0	3	3.36	3	3.36
354	Rv2459	Rv2459	PROBABLE CONSERVED INTEGRAL MEMBRANE TRANSPORT PROTEIN [MASS=53479]	gi|15609596|ref|NP_216975.1|	2	1.8	0	0	2	1.8
355	Rv2461c	ClpP1	ATP-dependent Clp protease proteolytic subunit [MASS=21708]	gi|57116992|ref|YP_177883.1|	0	0	9	10.08	9	10.08
356	Rv2476c	Gdh	PROBABLE NAD-DEPENDENT GLUTAMATE DEHYDROGENASE GDH (NAD-GDH) (NAD-DEPENDENT GLUTAMIC DEHYDROGENASE) [MASS=176899]	gi|15609613|ref|NP_216992.1|	4	3.6	0	0	4	3.6
357	Rv2487c	PE_PGRS42	PE-PGRS FAMILY PROTEIN [MASS=57217]	gi|57116995|ref|YP_177886.1|	6	5.4	16	17.92	22	23.32
358	Rv2488c	Rv2488c	PROBABLE TRANSCRIPTIONAL REGULATORY PROTEIN (LUXR-FAMILY) [MASS=120817]	gi|15609625|ref|NP_217004.1|	0	0	2	2.24	2	2.24
359	Rv2490c	PE_PGRS43	PE-PGRS FAMILY PROTEIN [MASS=133123]	gi|57116996|ref|YP_177887.1|	10	9	21	23.52	31	32.52
360	Rv2505c	FadD35	acyl-CoA synthetase [MASS=59778]	gi|15609642|ref|NP_217021.1|	9	8.1	0	0	9	8.1
361	Rv2522c	Rv2522c	hypothetical protein Rv2522c [MASS=49325]	gi|15609659|ref|NP_217038.1|	0	0	7	7.84	7	7.84
362	Rv2524c	Fas	PROBABLE FATTY ACID SYNTHASE FAS (FATTY ACID SYNTHETASE) [MASS=326252]	gi|15609661|ref|NP_217040.1|	13	11.7	0	0	13	11.7
363	Rv2542	Rv2542	hypothetical protein Rv2542 [MASS=42480]	gi|15609679|ref|NP_217058.1|	0	0	7	7.84	7	7.84
364	Rv2555c	AlaS	alanyl-tRNA synthetase [MASS=97356]	gi|15609692|ref|NP_217071.1|	3	2.7	0	0	3	2.7
365	Rv2563	Rv2563	PROBABLE GLUTAMINE-TRANSPORT TRANSMEMBRANE PROTEIN ABC TRANSPORTER [MASS=36025]	gi|15609700|ref|NP_217079.1|	7	6.3	0	0	7	6.3
366	Rv2566	Rv2566	LONG CONSERVED HYPOTHETICAL PROTEIN [MASS=124535]	gi|15609703|ref|NP_217082.1|	6	5.4	5	5.6	11	11
367	Rv2567	Rv2567	CONSERVED HYPOTHETICAL ALANINE AND LEUCINE RICH PROTEIN [MASS=95448]	gi|15609704|ref|NP_217083.1|	3	2.7	27	30.24	30	32.94
368	Rv2589	GabT	4-aminobutyrate aminotransferase [MASS=46812]	gi|15609726|ref|NP_217105.1|	0	0	28	31.36	28	31.36
369	Rv2597	Rv2597	PROBABLE MEMBRANE PROTEIN [MASS=21943]	gi|15609734|ref|NP_217113.1|	0	0	4	4.48	4	4.48
370	Rv2601	SpeE	spermidine synthase [MASS=54683]	gi|57117003|ref|YP_177892.1|	2	1.8	0	0	2	1.8
371	Rv2612c	PgsA1	PROBABLE PI SYNTHASE PGSA1 (PHOSPHATIDYLINOSITOL SYNTHASE) (CDP-DIACYLGLYCEROL--INOSITOL3-PHOSPHATIDYLTRANSFERASE) [MASS=23251]	gi|57117006|ref|YP_177894.1|	3	2.7	0	0	3	2.7
372	Rv2627c	Rv2627c	hypothetical protein Rv2627c [MASS=46252]	gi|15609764|ref|NP_217143.1|	0	0	2	2.24	2	2.24
373	Rv2631	Rv2631	hypothetical protein Rv2631 [MASS=45528]	gi|57117009|ref|NP_217147.2|	5	4.5	3	3.36	8	7.86
374	Rv2634c	PE_PGRS46	PE-PGRS FAMILY PROTEIN [MASS=63130]	gi|57117010|ref|YP_177896.1|	5	4.5	12	13.44	17	17.94
375	Rv2637	DedA	POSSIBLE TRANSMEMBRANE PROTEIN DEDA [MASS=23003]	gi|15609774|ref|NP_217153.1|	4	3.6	0	0	4	3.6
376	Rv2643	ArsC	PROBABLE ARSENIC-TRANSPORT INTEGRAL MEMBRANE PROTEIN ARSC [MASS=53225]	gi|15609780|ref|NP_217159.1|	0	0	2	2.24	2	2.24
377	Rv2661c	Rv2661c	hypothetical protein Rv2661c [MASS=13700]	gi|15609798|ref|NP_217177.1|	0	0	3	3.36	3	3.36
378	Rv2671	RibD	hypothetical protein Rv2671 [MASS=27693]	gi|15609808|ref|NP_217187.1|	3	2.7	0	0	3	2.7
379	Rv2690c	Rv2690c	PROBABLE CONSERVED INTEGRAL MEMBRANE ALANINE AND VALINE AND LEUCINE RICH PROTEIN [MASS=70802]	gi|15609827|ref|NP_217206.1|	5	4.5	0	0	5	4.5
380	Rv2741	PE_PGRS47	PE-PGRS FAMILY PROTEIN [MASS=44210]	gi|57117018|ref|YP_177902.1|	0	0	9	10.08	9	10.08
381	Rv2768c	PPE43	PPE FAMILY PROTEIN [MASS=38627]	gi|57117022|ref|YP_177906.1|	4	3.6	5	5.6	9	9.2
382	Rv2769c	PE27	PE FAMILY PROTEIN [MASS=26381]	gi|57117023|ref|YP_177907.1|	3	2.7	0	0	3	2.7
383	Rv2770c	PPE44	PPE FAMILY PROTEIN [MASS=37467]	gi|57117024|ref|YP_177677.1|	0	0	3	3.36	3	3.36
384	Rv2771c	Rv2771c	hypothetical protein Rv2771c [MASS=16032]	gi|15609908|ref|NP_217287.1|	0	0	2	2.24	2	2.24
385	Rv2773c	DapB	dihydrodipicolinate reductase [MASS=25733]	gi|15609910|ref|NP_217289.1|	4	3.6	0	0	4	3.6
386	Rv2781c	Rv2781c	POSSIBLE ALANINE RICH OXIDOREDUCTASE [MASS=35393]	gi|15609918|ref|NP_217297.1|	0	0	5	5.6	5	5.6
387	Rv2783c	GpsI	polynucleotide phosphorylase/polyadenylase [MASS=79734]	gi|15609920|ref|NP_217299.1|	0	0	15	16.8	15	16.8
388	Rv2811	Rv2811	hypothetical protein Rv2811 [MASS=21118]	gi|15609948|ref|NP_217327.1|	9	8.1	0	0	9	8.1
389	Rv2829c	Rv2829c	hypothetical protein Rv2829c [MASS=14611]	gi|15609966|ref|NP_217345.1|	2	1.8	0	0	2	1.8
390	Rv2833c	UgpB	PROBABLE Sn-GLYCEROL-3-PHOSPHATE-BINDING LIPOPROTEIN UGPB [MASS=46725]	gi|15609970|ref|NP_217349.1|	0	0	3	3.36	3	3.36
391	Rv2842	Rv2842	hypothetical protein Rv2824c [MASS=34432]	gi|15609961|ref|NP_217340.1|	3	2.7	0	0	3	2.7
392	Rv2846c	EfpA	POSSIBLE INTEGRAL MEMBRANE EFFLUX PROTEIN EFPA [MASS=55579]	gi|15609983|ref|NP_217362.1|	5	4.5	0	0	5	4.5
393	Rv2853	PE_PGRS48	PE-PGRS FAMILY PROTEIN [MASS=51256]	gi|57117029|ref|YP_177909.1|	4	3.6	6	6.72	10	10.32
394	Rv2868c	GcpE	4-hydroxy-3-methylbut-2-en-1-yl diphosphate synthase [MASS=40482]	gi|15610005|ref|NP_217384.1|	0	0	6	6.72	6	6.72
395	Rv2874	DipZ	POSSIBLE INTEGRAL MEMBRANE C-TYPE CYTOCHROME BIOGENESIS PROTEIN DIPZ [MASS=74168]	gi|15610011|ref|NP_217390.1|	5	4.5	0	0	5	4.5
396	Rv2881c	CdsA	PROBABLE INTEGRAL MEMBRANE PHOSPHATIDATE CYTIDYLYLTRANSFERASE CDSA (CDP-DIGLYCERIDE SYNTHETASE) (CDP-DIGLYCERIDE PYROPHOSPHORYLASE) (CDP-DIACYLGLYCEROL SYNTHASE) (CDS) (CTP:PHOSPHATIDATE CYTIDYLYLTRANSFERASE) (CDP-DAG SYNTHASE) (CDP-DG SYNTHETASE) [MASS=32035]	gi|15610018|ref|NP_217397.1|	0	0	8	8.96	8	8.96
397	Rv2888c	AmiC	amidase [MASS=50916]	gi|15610025|ref|NP_217404.1|	0	0	3	3.36	3	3.36
398	Rv2892c	PPE45	PPE FAMILY PROTEIN [MASS=41469]	gi|57117034|ref|YP_177913.1|	0	0	6	6.72	6	6.72
399	Rv2900c	FdhF	POSSIBLE FORMATE DEHYDROGENASE H FDHF (FORMATE-HYDROGEN-LYASE-LINKED, SELENOCYSTEINE-CONTAINING POLYPEPTIDE) (FORMATE DEHYDROGENASE-H ALPHA SUBUNIT) (FDH-H) [MASS=84566]	gi|15610037|ref|NP_217416.1|	2	1.8	0	0	2	1.8
400	Rv2903c	LepB	PROBABLE SIGNAL PEPTIDASE I LEPB (SPASE I) (LEADER PEPTIDASE I). [MASS=31880]	gi|15610040|ref|NP_217419.1|	0	0	15	16.8	15	16.8
401	Rv2914c	PknI	PROBABLE TRANSMEMBRANE SERINE/THREONINE-PROTEIN KINASE I PKNI (PROTEIN KINASE I) (STPK I) (PHOSPHORYLASE B KINASE KINASE) (HYDROXYALKYL-PROTEIN KINASE) [MASS=61804]	gi|15610051|ref|NP_217430.1|	0	0	5	5.6	5	5.6
402	Rv2915c	Rv2915c	hypothetical protein Rv2915c [MASS=39770]	gi|15610052|ref|NP_217431.1|	2	1.8	0	0	2	1.8
403	Rv2928	TesA	PROBABLE THIOESTERASE TESA [MASS=29152]	gi|15610065|ref|NP_217444.1|	0	0	3	3.36	3	3.36
404	Rv2931	PpsA	PHENOLPTHIOCEROL SYNTHESIS TYPE-I POLYKETIDE SYNTHASE PPSA [MASS=198834]	gi|15610068|ref|NP_217447.1|	6	5.4	8	8.96	14	14.36
405	Rv2932	PpsB	PHENOLPTHIOCEROL SYNTHESIS TYPE-I POLYKETIDE SYNTHASE PPSB [MASS=162527]	gi|15610069|ref|NP_217448.1|	6	5.4	4	4.48	10	9.88
406	Rv2933	PpsC	PHENOLPTHIOCEROL SYNTHESIS TYPE-I POLYKETIDE SYNTHASE PPSC [MASS=230620]	gi|15610070|ref|NP_217449.1|	3	2.7	13	14.56	16	17.26
407	Rv2934	PpsD	PHENOLPTHIOCEROL SYNTHESIS TYPE-I POLYKETIDE SYNTHASE PPSD [MASS=193313]	gi|15610071|ref|NP_217450.1|	12	10.8	3	3.36	15	14.16
408	Rv2936	DrrA	PROBABLE DAUNORUBICIN-DIM-TRANSPORT ATP-BINDING PROTEIN ABC TRANSPORTER DRRA [MASS=35818]	gi|15610073|ref|NP_217452.1|	4	3.6	3	3.36	7	6.96
409	Rv2939	PapA5	acyltransferase PapA5 [MASS=45429]	gi|15610076|ref|NP_217455.1|	2	1.8	0	0	2	1.8
410	Rv2940c	Mas	PROBABLE MULTIFUNCTIONAL MYCOCEROSIC ACID SYNTHASE MEMBRANE-ASSOCIATED MAS [MASS=224378]	gi|15610077|ref|NP_217456.1|	4	3.6	12	13.44	16	17.04
411	Rv2941	FadD28	acyl-CoA synthetase [MASS=62640]	gi|15610078|ref|NP_217457.1|	5	4.5	0	0	5	4.5
412	Rv2942	MmpL7	CONSERVED TRANSMEMBRANE TRANSPORT PROTEIN MMPL7 [MASS=95121]	gi|15610079|ref|NP_217458.1|	0	0	4	4.48	4	4.48
413	Rv2947c	Pks15	PROBABLE POLYKETIDE SYNTHASE PKS15 [MASS=51701]	gi|15610084|ref|NP_217463.1|	2	1.8	0	0	2	1.8
414	Rv2950c	FadD29	acyl-CoA synthetase [MASS=63657]	gi|161352463|ref|NP_217466.2|	5	4.5	0	0	5	4.5
415	Rv2967c	Pca	pyruvate carboxylase [MASS=120423]	gi|15610104|ref|NP_217483.1|	4	3.6	0	0	4	3.6
416	Rv2977c	ThiL	thiamine monophosphate kinase [MASS=34330]	gi|15610114|ref|NP_217493.1|	0	0	5	5.6	5	5.6
417	Rv2981c	DdlA	D-alanyl-alanine synthetase A [MASS=39710]	gi|15610118|ref|NP_217497.1|	2	1.8	0	0	2	1.8
418	Rv2982c	GpdA2	NAD(P)H-dependent glycerol-3-phosphate dehydrogenase [MASS=33992]	gi|15610119|ref|NP_217498.1|	3	2.7	0	0	3	2.7
419	Rv2983	Rv2983	CONSERVED HYPOTHETICAL ALANINE RICH PROTEIN [MASS=21819]	gi|15610120|ref|NP_217499.1|	3	2.7	0	0	3	2.7
420	Rv2994	Rv2994	PROBABLE CONSERVED INTEGRAL MEMBRANE PROTEIN [MASS=47046]	gi|15610131|ref|NP_217510.1|	4	3.6	0	0	4	3.6
421	Rv3003c	IlvB1	acetolactate synthase 1 catalytic subunit [MASS=66122]	gi|57117044|ref|YP_177917.1|	0	0	13	14.56	13	14.56
422	Rv3009c	GatB	aspartyl/glutamyl-tRNA amidotransferase subunit B [MASS=54633]	gi|15610146|ref|NP_217525.1|	5	4.5	0	0	5	4.5
423	Rv3031	Rv3031	hypothetical protein Rv3031 [MASS=57815]	gi|15610168|ref|NP_217547.1|	3	2.7	3	3.36	6	6.06
424	Rv3035	Rv3035	hypothetical protein Rv3035 [MASS=37323]	gi|15610172|ref|NP_217551.1|	3	2.7	0	0	3	2.7
425	Rv3043c	CtaD	PROBABLE CYTOCHROME C OXIDASE POLYPEPTIDE I CTAD (CYTOCHROME AA3 SUBUNIT 1) [MASS=63672]	gi|15610180|ref|NP_217559.1|	4	3.6	0	0	4	3.6
426	Rv3063	CstA	PROBABLE CARBON STARVATION PROTEIN A HOMOLOG CSTA [MASS=80163]	gi|15610200|ref|NP_217579.1|	3	2.7	3	3.36	6	6.06
427	Rv3077	Rv3077	POSSIBLE HYDROLASE [MASS=66740]	gi|57117053|ref|YP_177923.1|	3	2.7	0	0	3	2.7
428	Rv3078	Hab	PROBABLE HYDROXYLAMINOBENZENE MUTASE HAB [MASS=14080]	gi|15610215|ref|NP_217594.1|	0	0	2	2.24	2	2.24
429	Rv3080c	PknK	PROBABLE SERINE/THREONINE-PROTEIN KINASE TRANSCRIPTIONAL REGULATORY PROTEIN PKNK (PROTEIN KINASE K) (STPK K) [MASS=119417]	gi|15610217|ref|NP_217596.1|	2	1.8	3	3.36	5	5.16
430	Rv3083	Rv3083	PROBABLE MONOOXYGENASE (HYDROXYLASE) [MASS=55482]	gi|15610220|ref|NP_217599.1|	4	3.6	0	0	4	3.6
431	Rv3084	LipR	PROBABLE ACETYL-HYDROLASE/ESTERASE LIPR [MASS=32617]	gi|15610221|ref|NP_217600.1|	0	0	5	5.6	5	5.6
432	Rv3097c	PE_PGRS63	PE-PGRS FAMILY PROTEIN, PROBABLY TRIACYLGLYCEROL LIPASE (ESTERASE/LIPASE) (TRIGLYCERIDE LIPASE) (TRIBUTYRASE) [MASS=45023]	gi|57117054|ref|YP_177924.1|	0	0	15	16.8	15	16.8
433	Rv3114	Rv3114	hypothetical protein Rv3114 [MASS=18875]	gi|15610251|ref|NP_217630.1|	0	0	5	5.6	5	5.6
434	Rv3125c	PPE49	PPE FAMILY PROTEIN [MASS=38585]	gi|57117062|ref|YP_177932.1|	0	0	10	11.2	10	11.2
435	Rv3136	PPE51	PPE FAMILY PROTEIN [MASS=37980]	gi|57117065|ref|YP_177935.1|	3	2.7	0	0	3	2.7
436	Rv3139	FadE24	PROBABLE ACYL-CoA DEHYDROGENASE FADE24 [MASS=49646]	gi|15610275|ref|NP_217655.1|	0	0	2	2.24	2	2.24
437	Rv3144c	PPE52	PPE-FAMILY PROTEIN [MASS=39098]	gi|57117066|ref|YP_177936.1|	0	0	8	8.96	8	8.96
438	Rv3158	NuoN	NADH dehydrogenase subunit N [MASS=55342]	gi|15610294|ref|NP_217674.1|	0	0	3	3.36	3	3.36
439	Rv3159c	PPE53	PPE FAMILY PROTEIN [MASS=56585]	gi|57117067|ref|YP_177937.1|	0	0	3	3.36	3	3.36
440	Rv3193c	Rv3193c	hypothetical protein Rv3193c [MASS=107501]	gi|15610329|ref|NP_217709.1|	4	3.6	0	0	4	3.6
441	Rv3201c	Rv3201c	PROBABLE ATP-DEPENDENT DNA HELICASE [MASS=116688]	gi|15610337|ref|NP_217717.1|	0	0	10	11.2	10	11.2
442	Rv3220c	Rv3220c	PROBABLE TWO COMPONENT SENSOR KINASE [MASS=54012]	gi|15610356|ref|NP_217736.1|	4	3.6	0	0	4	3.6
443	Rv3222c	Rv3222c	hypothetical protein Rv3222c [MASS=18315]	gi|15610358|ref|NP_217738.1|	0	0	7	7.84	7	7.84
444	Rv3234c	Rv3234c	hypothetical protein Rv3234c [MASS=30379]	gi|15610370|ref|NP_217751.1|	2	1.8	0	0	2	1.8
445	Rv3239c	Rv3239c	PROBABLE CONSERVED TRANSMEMBRANE TRANSPORT PROTEIN [MASS=110198]	gi|15610375|ref|NP_217756.1|	2	1.8	5	5.6	7	7.4
446	Rv3241c	Rv3241c	hypothetical protein Rv3241c [MASS=24567]	gi|15610377|ref|NP_217758.1|	2	1.8	0	0	2	1.8
447	Rv3253c	Rv3253c	POSSIBLE CATIONIC AMINO ACID TRANSPORT INTEGRAL MEMBRANE PROTEIN [MASS=52519]	gi|15610389|ref|NP_217770.1|	0	0	4	4.48	4	4.48
448	Rv3273	Rv3273	PROBABLE TRANSMEMBRANE CARBONIC ANHYDRASE (CARBONATE DEHYDRATASE) (CARBONIC DEHYDRATASE) [MASS=80565]	gi|15610409|ref|NP_217790.1|	0	0	7	7.84	7	7.84
449	Rv3292	Rv3292	hypothetical protein Rv3292 [MASS=45332]	gi|15610428|ref|NP_217809.1|	0	0	6	6.72	6	6.72
450	Rv3295	Rv3295	PROBABLE TRANSCRIPTIONAL REGULATORY PROTEIN (PROBABLY TETR-FAMILY) [MASS=24805]	gi|15610431|ref|NP_217812.1|	3	2.7	0	0	3	2.7
451	Rv3296	Lhr	PROBABLE ATP-DEPENDENT HELICASE LHR (LARGE HELICASE-RELATED PROTEIN) [MASS=161378]	gi|15610432|ref|NP_217813.1|	3	2.7	0	0	3	2.7
452	Rv3318	SdhA	succinate dehydrogenase flavoprotein subunit [MASS=64825]	gi|15610454|ref|NP_217835.1|	4	3.6	2	2.24	6	5.84
453	Rv3332	NagA	PROBABLE N-ACETYLGLUCOSAMINE-6-PHOSPHATE DEACETYLASE NAGA (GLCNAC 6-P DEACETYLASE) [MASS=38805]	gi|15610468|ref|NP_217849.1|	3	2.7	0	0	3	2.7
454	Rv3335c	Rv3335c	PROBABLE CONSERVED INTEGRAL MEMBRANE PROTEIN [MASS=31293]	gi|15610471|ref|NP_217852.1|	3	2.7	0	0	3	2.7
455	Rv3343c	PPE54	PPE FAMILY PROTEIN [MASS=250344]	gi|57117092|ref|YP_177960.1|	4	3.6	5	5.6	9	9.2
456	Rv3345c	PE_PGRS50	PE-PGRS FAMILY PROTEIN [MASS=129384]	gi|57117094|ref|YP_177962.1|	5	4.5	5	5.6	10	10.1
457	Rv3347c	PPE55	PPE FAMILY PROTEIN [MASS=309556]	gi|57117095|ref|YP_177963.1|	6	5.4	9	10.08	15	15.48
458	Rv3350c	PPE56	PPE FAMILY PROTEIN [MASS=363348]	gi|57117096|ref|YP_177964.1|	8	7.2	15	16.8	23	24
459	Rv3354	Rv3354	hypothetical protein Rv3354 [MASS=12988]	gi|15610490|ref|NP_217871.1|	0	0	6	6.72	6	6.72
460	Rv3366	SpoU	PROBABLE tRNA/rRNA METHYLASE SPOU (tRNA/rRNA METHYLTRANSFERASE) [MASS=16517]	gi|15610502|ref|NP_217883.1|	2	1.8	0	0	2	1.8
461	Rv3367	PE_PGRS51	PE-PGRS FAMILY PROTEIN [MASS=49707]	gi|57117098|ref|YP_177965.1|	0	0	3	3.36	3	3.36
462	Rv3373	EchA18	PROBABLE ENOYL-CoA HYDRATASE ECHA18 (ENOYL HYDRASE) (UNSATURATED ACYL-CoA HYDRATASE) (CROTONASE) [MASS=22662]	gi|15610509|ref|NP_217890.1|	3	2.7	0	0	3	2.7
463	Rv3375	AmiD	PROBABLE AMIDASE AMID (ACYLAMIDASE) (ACYLASE) [MASS=50645]	gi|15610511|ref|NP_217892.1|	0	0	8	8.96	8	8.96
464	Rv3383c	IdsB	POSSIBLE POLYPRENYL SYNTHETASE IDSB (POLYPRENYL TRANSFERASE) (POLYPRENYL DIPHOSPHATE SYNTHASE) [MASS=36432]	gi|15610519|ref|NP_217900.1|	3	2.7	0	0	3	2.7
465	Rv3388	PE_PGRS52	PE-PGRS FAMILY PROTEIN [MASS=60454]	gi|57117101|ref|YP_177968.1|	8	7.2	0	0	8	7.2
466	Rv3394c	Rv3394c	hypothetical protein Rv3394c [MASS=56666]	gi|15610530|ref|NP_217911.1|	0	0	5	5.6	5	5.6
467	Rv3395c	Rv3395c	hypothetical protein Rv3395c [MASS=20793]	gi|57117102|ref|NP_217912.2|	3	2.7	0	0	3	2.7
468	Rv3396c	GuaA	bifunctional GMP synthase/glutamine amidotransferase protein [MASS=56059]	gi|15610532|ref|NP_217913.1|	0	0	4	4.48	4	4.48
469	Rv3401	Rv3401	hypothetical protein Rv3401 [MASS=87315]	gi|15610537|ref|NP_217918.1|	0	0	3	3.36	3	3.36
470	Rv3403c	Rv3403c	hypothetical protein Rv3403c [MASS=57880]	gi|15610539|ref|NP_217920.1|	17	15.3	0	0	17	15.3
471	Rv3433c	Rv3433c	hypothetical protein Rv3433c [MASS=46857]	gi|15610569|ref|NP_217950.1|	0	0	8	8.96	8	8.96
472	Rv3436c	GlmS	D-fructose-6-phosphate amidotransferase [MASS=67571]	gi|15610572|ref|NP_217953.1|	4	3.6	0	0	4	3.6
473	Rv3447c	Rv3447c	PROBABLE CONSERVED MEMBRANE PROTEIN [MASS=131895]	gi|15610583|ref|NP_217964.1|	11	9.9	35	39.2	46	49.1
474	Rv3449	MycP4	PROBABLE MEMBRANE-ANCHORED MYCOSIN MYCP4 (SERINE PROTEASE) (SUBTILISIN-LIKE PROTEASE) (SUBTILASE-LIKE) (MYCOSIN-4) [MASS=46016]	gi|15610585|ref|NP_217966.1|	14	12.6	0	0	14	12.6
475	Rv3470c	IlvB2	PROBABLE ACETOLACTATE SYNTHASE (LARGE SUBUNIT) ILVB2 (AHAS) (ACETOHYDROXY-ACID SYNTHASE LARGE SUBUNIT) (ALS) [MASS=57256]	gi|15610606|ref|NP_217987.1|	4	3.6	0	0	4	3.6
476	Rv3478	PPE60	PE FAMILY PROTEIN [MASS=39413]	gi|57117111|ref|YP_177976.1|	0	0	4	4.48	4	4.48
477	Rv3479	Rv3479	POSSIBLE TRANSMEMBRANE PROTEIN [MASS=109259]	gi|57117112|ref|NP_217996.2|	3	2.7	0	0	3	2.7
478	Rv3483c	Rv3483c	hypothetical protein Rv3483c [MASS=22982]	gi|15610619|ref|NP_218000.1|	0	0	4	4.48	4	4.48
479	Rv3491	Rv3491	hypothetical protein Rv3491 [MASS=20363]	gi|15610627|ref|NP_218008.1|	0	0	5	5.6	5	5.6
480	Rv3494c	Mce4F	MCE-FAMILY PROTEIN MCE4F [MASS=59636]	gi|15610630|ref|NP_218011.1|	3	2.7	0	0	3	2.7
481	Rv3507	PE_PGRS53	PE-PGRS FAMILY PROTEIN [MASS=110622]	gi|57117114|ref|YP_177978.1|	16	14.4	61	68.32	77	82.72
482	Rv3508	PE_PGRS54	PE-PGRS FAMILY PROTEIN [MASS=147624]	gi|57117115|ref|YP_177979.1|	0	0	28	31.36	28	31.36
483	Rv3512	PE_PGRS56	PE-PGRS FAMILY PROTEIN [MASS=81161]	gi|57117117|ref|YP_177981.1|	23	20.7	23	25.76	46	46.46
484	Rv3514	PE_PGRS57	PE-PGRS FAMILY PROTEIN [MASS=115752]	gi|57117118|ref|YP_177982.1|	9	8.1	26	29.12	35	37.22
485	Rv3515c	FadD19	acyl-CoA synthetase [MASS=59740]	gi|57117119|ref|YP_177983.1|	2	1.8	0	0	2	1.8
486	Rv3521	Rv3521	hypothetical protein Rv3521 [MASS=33002]	gi|15610657|ref|NP_218038.1|	4	3.6	0	0	4	3.6
487	Rv3537	Rv3537	3-ketosteroid-delta-1-dehydrogenase [MASS=60636]	gi|15610673|ref|NP_218054.1|	0	0	4	4.48	4	4.48
488	Rv3550	EchA20	enoyl-CoA hydratase [MASS=26333]	gi|15610686|ref|NP_218067.1|	0	0	2	2.24	2	2.24
489	Rv3554	FdxB	POSSIBLE ELECTRON TRANSFER PROTEIN FDXB [MASS=76565]	gi|15610690|ref|NP_218071.1|	3	2.7	0	0	3	2.7
490	Rv3556c	FadA6	acetyl-CoA acetyltransferase [MASS=40902]	gi|15610692|ref|NP_218073.1|	0	0	7	7.84	7	7.84
491	Rv3561	FadD3	acyl-CoA synthetase [MASS=54094]	gi|15610697|ref|NP_218078.1|	7	6.3	0	0	7	6.3
492	Rv3573c	FadE34	PROBABLE ACYL-CoA DEHYDROGENASE FADE34 [MASS=74578]	gi|15610709|ref|NP_218090.1|	2	1.8	4	4.48	6	6.28
493	Rv3576	LppH	POSSIBLE CONSERVED LIPOPROTEIN LPPH [MASS=25052]	gi|57117127|ref|YP_177991.1|	5	4.5	0	0	5	4.5
494	Rv3590c	PE_PGRS58	PE-PGRS FAMILY PROTEIN [MASS=48398]	gi|57117129|ref|YP_177993.1|	5	4.5	10	11.2	15	15.7
495	Rv3595c	PE_PGRS59	PE-PGRS FAMILY PROTEIN [MASS=37142]	gi|57117130|ref|YP_177994.1|	0	0	5	5.6	5	5.6
496	Rv3596c	ClpC1	PROBABLE ATP-DEPENDENT PROTEASE ATP-BINDING SUBUNIT CLPC1 [MASS=93552]	gi|57117131|ref|YP_177995.1|	3	2.7	0	0	3	2.7
497	Rv3604c	Rv3604c	PROBABLE CONSERVED TRANSMEMBRANE PROTEIN RICH IN ALANINE AND ARGININE AND PROLINE [MASS=43058]	gi|57117132|ref|NP_218121.2|	3	2.7	0	0	3	2.7
498	Rv3610c	FtsH	MEMBRANE-BOUND PROTEASE FTSH (CELL DIVISION PROTEIN) [MASS=81985]	gi|15610746|ref|NP_218127.1|	7	6.3	0	0	7	6.3
499	Rv3621c	PPE65	PPE FAMILY PROTEIN [MASS=40680]	gi|57117135|ref|YP_177998.1|	5	4.5	6	6.72	11	11.22
500	Rv3626c	Rv3626c	hypothetical protein Rv3626c [MASS=38439]	gi|15610762|ref|NP_218143.1|	5	4.5	0	0	5	4.5
501	Rv3630	Rv3630	PROBABLE CONSERVED INTEGRAL MEMBRANE PROTEIN [MASS=43485]	gi|15610766|ref|NP_218147.1|	4	3.6	0	0	4	3.6
502	Rv3661	Rv3661	hypothetical protein Rv3661 [MASS=30711]	gi|15610797|ref|NP_218178.1|	0	0	8	8.96	8	8.96
503	Rv3672c	Rv3672c	hypothetical protein Rv3672c [MASS=28891]	gi|15610808|ref|NP_218189.1|	3	2.7	0	0	3	2.7
504	Rv3676	Rv3676	PROBABLE TRANSCRIPTIONAL REGULATORY PROTEIN (PROBABLY CRP/FNR-FAMILY) [MASS=24791]	gi|15610812|ref|NP_218193.1|	3	2.7	0	0	3	2.7
505	Rv3695	Rv3695	POSSIBLE CONSERVED MEMBRANE PROTEIN [MASS=33168]	gi|15610831|ref|NP_218212.1|	0	0	2	2.24	2	2.24
506	Rv3710	LeuA	2-isopropylmalate synthase [MASS=65888]	gi|161352459|ref|NP_218227.2|	0	0	7	7.84	7	7.84
507	Rv3711c	DnaQ	DNA polymerase III subunit epsilon [MASS=35782]	gi|15610847|ref|NP_218228.1|	0	0	5	5.6	5	5.6
508	Rv3712	Rv3712	POSSIBLE LIGASE [MASS=43421]	gi|15610848|ref|NP_218229.1|	3	2.7	0	0	3	2.7
509	Rv3720	Rv3720	POSSIBLE FATTY ACID SYNTHASE [MASS=46852]	gi|15610856|ref|NP_218237.1|	7	6.3	0	0	7	6.3
510	Rv3726	Rv3726	POSSIBLE DEHYDROGENASE [MASS=42036]	gi|15610862|ref|NP_218243.1|	0	0	6	6.72	6	6.72
511	Rv3727	Rv3727	POSSIBLE OXIDOREDUCTASE [MASS=66293]	gi|15610863|ref|NP_218244.1|	8	7.2	0	0	8	7.2
512	Rv3730c	Rv3730c	hypothetical protein Rv3730c [MASS=38543]	gi|15610866|ref|NP_218247.1|	2	1.8	0	0	2	1.8
513	Rv3736	Rv3736	TRANSCRIPTIONAL REGULATORY PROTEIN (PROBABLY ARAC/XYLS-FAMILY) [MASS=37973]	gi|15610872|ref|NP_218253.1|	3	2.7	0	0	3	2.7
514	Rv3752c	Rv3752c	POSSIBLE CYTIDINE/DEOXYCYTIDYLATE DEAMINASE [MASS=15877]	gi|15610888|ref|NP_218269.1|	0	0	2	2.24	2	2.24
515	Rv3757c	ProW	POSSIBLE OSMOPROTECTANT (GLYCINE BETAINE/CARNITINE/CHOLINE/L-PROLINE) TRANSPORT INTEGRAL MEMBRANE PROTEIN ABC TRANSPORTER PROW [MASS=24109]	gi|15610893|ref|NP_218274.1|	3	2.7	0	0	3	2.7
516	Rv3762c	Rv3762c	POSSIBLE HYDROLASE [MASS=68483]	gi|15610898|ref|NP_218279.1|	0	0	3	3.36	3	3.36
517	Rv3766	Rv3766	hypothetical protein Rv3766 [MASS=24605]	gi|15610902|ref|NP_218283.1|	2	1.8	0	0	2	1.8
518	Rv3779	Rv3779	PROBABLE CONSERVED TRANSMEMBRANE PROTEIN ALANINE AND LEUCINE RICH [MASS=71794]	gi|15610915|ref|NP_218296.1|	0	0	5	5.6	5	5.6
519	Rv3785	Rv3785	hypothetical protein Rv3785 [MASS=38931]	gi|15610921|ref|NP_218302.1|	4	3.6	0	0	4	3.6
520	Rv3793	EmbC	INTEGRAL MEMBRANE INDOLYLACETYLINOSITOL ARABINOSYLTRANSFERASE EMBC (ARABINOSYLINDOLYLACETYLINOSITOL SYNTHASE) [MASS=117489]	gi|15610929|ref|NP_218310.1|	8	7.2	0	0	8	7.2
521	Rv3794	EmbA	INTEGRAL MEMBRANE INDOLYLACETYLINOSITOL ARABINOSYLTRANSFERASE EMBA (ARABINOSYLINDOLYLACETYLINOSITOL SYNTHASE) [MASS=115723]	gi|15610930|ref|NP_218311.1|	0	0	3	3.36	3	3.36
522	Rv3800c	Pks13	POLYKETIDE SYNTHASE PKS13 [MASS=186444]	gi|15610936|ref|NP_218317.1|	0	0	8	8.96	8	8.96
523	Rv3808c	GlfT	BIFUNCTIONAL UDP-GALACTOFURANOSYL TRANSFERASE GLFT [MASS=71506]	gi|15610944|ref|NP_218325.1|	0	0	4	4.48	4	4.48
524	Rv3812	PE_PGRS62	PE-PGRS FAMILY PROTEIN [MASS=51821]	gi|57117161|ref|YP_178019.1|	2	1.8	6	6.72	8	8.52
525	Rv3823c	MmpL8	PROBABLE CONSERVED INTEGRAL MEMBRANE TRANSPORT PROTEIN MMPL8 [MASS=115997]	gi|15610959|ref|NP_218340.1|	5	4.5	0	0	5	4.5
526	Rv3824c	PapA1	PROBABLE CONSERVED POLYKETIDE SYNTHASE ASSOCIATED PROTEIN PAPA1 [MASS=56127]	gi|15610960|ref|NP_218341.1|	0	0	3	3.36	3	3.36
527	Rv3826	FadD23	acyl-CoA synthetase [MASS=62840]	gi|15610962|ref|NP_218343.1|	0	0	3	3.36	3	3.36
528	Rv3829c	Rv3829c	PROBABLE DEHYDROGENASE [MASS=57073]	gi|15610965|ref|NP_218346.1|	5	4.5	6	6.72	11	11.22
529	Rv3835	Rv3835	PROBABLE CONSERVED MEMBRANE PROTEIN [MASS=47043]	gi|15610971|ref|NP_218352.1|	0	0	6	6.72	6	6.72
530	Rv3859c	GltB	PROBABLE FERREDOXIN-DEPENDENT GLUTAMATE SYNTHASE [NADPH] (LARGE SUBUNIT) GLTB (L-GLUTAMATE SYNTHASE) (L-GLUTAMATE SYNTHETASE) (NADH-GLUTAMATE SYNTHASE) (GLUTAMATE SYNTHASE (NADH))(NADPH-GOGAT) [MASS=165942]	gi|15610995|ref|NP_218376.1|	15	13.5	8	8.96	23	22.46
531	Rv3868	Rv3868	hypothetical protein Rv3868 [MASS=62425]	gi|15611004|ref|NP_218385.1|	5	4.5	0	0	5	4.5
532	Rv3869	Rv3869	POSSIBLE CONSERVED MEMBRANE PROTEIN [MASS=51092]	gi|15611005|ref|NP_218386.1|	4	3.6	0	0	4	3.6
533	Rv3870	Rv3870	POSSIBLE CONSERVED TRANSMEMBRANE PROTEIN [MASS=80912]	gi|15611006|ref|NP_218387.1|	0	0	10	11.2	10	11.2
534	Rv3876	Rv3876	CONSERVED HYPOTHETICAL PROLINE AND ALANINE RICH PROTEIN [MASS=70645]	gi|15611012|ref|NP_218393.1|	0	0	5	5.6	5	5.6
535	Rv3878	Rv3878	CONSERVED HYPOTHETICAL ALANINE RICH PROTEIN [MASS=27395]	gi|15611014|ref|NP_218395.1|	0	0	9	10.08	9	10.08
536	Rv3879c	Rv3879c	HYPOTHETICAL ALANINE AND PROLINE RICH PROTEIN [MASS=74492]	gi|15611015|ref|NP_218396.1|	0	0	7	7.84	7	7.84
537	Rv3881c	Rv3881c	CONSERVED HYPOTHETICAL ALANINE AND GLYCINE RICH PROTEIN [MASS=47593]	gi|15611017|ref|NP_218398.1|	0	0	8	8.96	8	8.96
538	Rv3887c	Rv3887c	PROBABLE CONSERVED TRANSMEMBRANE PROTEIN [MASS=53278]	gi|15611023|ref|NP_218404.1|	8	7.2	0	0	8	7.2
539	Rv3892c	PPE69	PPE FAMILY PROTEIN [MASS=38852]	gi|57117166|ref|YP_178024.1|	0	0	12	13.44	12	13.44
540	Rv3894c	Rv3894c	POSSIBLE CONSERVED MEMBRANE PROTEIN [MASS=153699]	gi|15611030|ref|NP_218411.1|	6	5.4	0	0	6	5.4
541	Rv3897c	Rv3897c	hypothetical protein Rv3897c [MASS=20285]	gi|15611033|ref|NP_218414.1|	0	0	8	8.96	8	8.96
542	Rv3898c	Rv3898c	hypothetical protein Rv3898c [MASS=10875]	gi|15611034|ref|NP_218415.1|	7	6.3	0	0	7	6.3
543	Rv3899c	Rv3899c	hypothetical protein Rv3899c [MASS=40788]	gi|15611035|ref|NP_218416.1|	0	0	10	11.2	10	11.2
544	Rv3912	Rv3912	HYPOTHETICAL ALANINE RICH PROTEIN [MASS=25769]	gi|15611048|ref|NP_218429.1|	0	0	4	4.48	4	4.48
545	Rv3915	Rv3915	PROBABLE HYDROLASE [MASS=43911]	gi|57117169|ref|YP_178027.1|	3	2.7	0	0	3	2.7
