# Supplementary material for: Portrait of a Pathogen: The Mycobacterium tuberculosis Proteome In Vivo
Source: PLoS One. 2010 Nov 11;5(11):e13938. doi: 10.1371/journal.pone.0013938 (PMC2978697; doi:10.1371/journal.pone.0013938)
Supplement: Table S4 — Spectral Counts of the Mtb Proteins Identified in Uninfected Guinea Pig Lungs. (2.57 MB XLS) [file pone.0013938.s004.xls]

## Sheet: Samples Report of uninfected_mu
Table S4. Spectral Counts of the Mtb Proteins Identified in Uninfected Guinea Pig Lungs
#	ORF	Protein Name	Protein Description [Protein Mass in Da]	Accession Number	Uninfected (spectral Counts)	Normalized Uninfected (spectral Counts)	Normalized 30 day (Spectral Counts)	Normalized 90 day (Spectral Counts)
1	Rv0101	Nrp	PROBABLE PEPTIDE SYNTHETASE NRP (PEPTIDE SYNTHASE) [Mycobacterium tuberculosis H37Rv] [MASS=269407]	gi|15607243|ref|NP_214615.1|	10	12.3	20.75	0
2	Rv0143c	Rv0143c	PROBABLE CONSERVED TRANSMEMBRANE PROTEIN [Mycobacterium tuberculosis H37Rv] [MASS=50808]	gi|15607285|ref|NP_214657.1|	2	2.46	0	7.14
3	Rv0278c	PE_PGRS3	PE-PGRS FAMILY PROTEIN [Mycobacterium tuberculosis H37Rv] [MASS=81904]	gi|57116712|ref|YP_177707.1|	8	9.84	5.81	6.12
4	Rv0304c	PPE5	PPE FAMILY PROTEIN [Mycobacterium tuberculosis H37Rv] [MASS=215693]	gi|57116719|ref|YP_177714.1|	10	12.3	4.15	0
5	Rv0355c	PPE8	PPE FAMILY PROTEIN [Mycobacterium tuberculosis H37Rv] [MASS=327028]	gi|57116726|ref|YP_177721.1|	9	11.07	5.81	8.16
6	Rv0387c	Rv0387c	hypothetical protein Rv0387c [Mycobacterium tuberculosis H37Rv] [MASS=23258]	gi|15607528|ref|NP_214901.1|	3	3.69	0	0
7	Rv0450c	MmpL4	PROBABLE CONSERVED TRANSMEMBRANE TRANSPORT PROTEIN MMPL4 [Mycobacterium tuberculosis H37Rv] [MASS=105234]	gi|15607591|ref|NP_214964.1|	3	3.69	2.49	0
8	Rv0631c	RecC	PROBABLE EXONUCLEASE V (GAMMA CHAIN) RECC (EXODEOXYRIBONUCLEASE V GAMMA CHAIN)(EXODEOXYRIBONUCLEASE V POLYPEPTIDE) [Mycobacterium tuberculosis H37Rv] [MASS=119500]	gi|15607771|ref|NP_215145.1|	11	13.53	0	0
9	Rv0697	Rv0697	PROBABLE DEHYDROGENASE [Mycobacterium tuberculosis H37Rv] [MASS=50291]	gi|15607837|ref|NP_215211.1|	10	12.3	2.49	0
10	Rv0761c	AdhB	POSSIBLE ZINC-CONTAINING ALCOHOL DEHYDROGENASE NAD DEPENDENT ADHB [Mycobacterium tuberculosis H37Rv] [MASS=39747]	gi|57116779|ref|YP_177754.1|	84	103.32	1.66	0
11	Rv0834c	PE_PGRS14	PE-PGRS FAMILY PROTEIN [Mycobacterium tuberculosis H37Rv] [MASS=71698]	gi|57116789|ref|YP_177761.1|	16	19.68	3.32	8.16
12	Rv0872c	PE_PGRS15	PE-PGRS FAMILY PROTEIN [Mycobacterium tuberculosis H37Rv] [MASS=50267]	gi|57116793|ref|YP_177763.1|	25	30.75	7.47	10.2
13	Rv0906	Rv0906	hypothetical protein Rv0906 [Mycobacterium tuberculosis H37Rv] [MASS=40641]	gi|15608046|ref|NP_215421.1|	53	65.19	0	0
14	Rv0932c	PstS2	PERIPLASMIC PHOSPHATE-BINDING LIPOPROTEIN PSTS2 (PBP-2) (PSTS2) [Mycobacterium tuberculosis H37Rv] [MASS=37864]	gi|57116800|ref|YP_177769.1|	24	29.52	0	0
15	Rv1091	PE_PGRS22	PE-PGRS FAMILY PROTEIN [Mycobacterium tuberculosis H37Rv] [MASS=68316]	gi|57116826|ref|YP_177786.1|	15	18.45	4.98	4.08
16	Rv1181	Pks4	PROBABLE POLYKETIDE BETA-KETOACYL SYNTHASE PKS4 [Mycobacterium tuberculosis H37Rv] [MASS=168115]	gi|15608321|ref|NP_215697.1|	9	11.07	4.98	6.12
17	Rv1325c	PE_PGRS24	PE-PGRS FAMILY PROTEIN [Mycobacterium tuberculosis H37Rv] [MASS=49574]	gi|57116848|ref|YP_177799.1|	38	46.74	9.13	9.18
18	Rv1363c	Rv1363c	POSSIBLE MEMBRANE PROTEIN [Mycobacterium tuberculosis H37Rv] [MASS=28308]	gi|15608503|ref|NP_215879.1|	8	9.84	0	0
19	Rv1527c	Pks5	Probable polyketide synthase pks5 [Mycobacterium tuberculosis H37Rv] [MASS=223887]	gi|15608665|ref|NP_216043.1|	17	20.91	10.79	4.08
20	Rv1661	Pks7	Probable polyketide synthase pks7 [Mycobacterium tuberculosis H37Rv] [MASS=221045]	gi|15608799|ref|NP_216177.1|	35	43.05	11.62	3.06
21	Rv1683	Rv1683	acyl-CoA synthetase [Mycobacterium tuberculosis H37Rv] [MASS=107394]	gi|15608821|ref|NP_216199.1|	8	9.84	0	0
22	Rv1706c	PPE23	PPE FAMILY PROTEIN [Mycobacterium tuberculosis H37Rv] [MASS=39778]	gi|57116899|ref|YP_177828.1|	11	13.53	0	8.16
23	Rv1774	Rv1774	PROBABLE OXIDOREDUCTASE [Mycobacterium tuberculosis H37Rv] [MASS=48340]	gi|15608912|ref|NP_216290.1|	9	11.07	0	0
24	Rv1800	PPE28	PPE FAMILY PROTEIN [Mycobacterium tuberculosis H37Rv] [MASS=67067]	gi|57116915|ref|YP_177839.1|	8	9.84	0	0
25	Rv1803c	PE_PGRS32	PE-PGRS FAMILY PROTEIN [Mycobacterium tuberculosis H37Rv] [MASS=54881]	gi|57116918|ref|YP_177842.1|	13	15.99	3.32	5.1
26	Rv1817	Rv1817	hypothetical protein Rv1817 [Mycobacterium tuberculosis H37Rv] [MASS=51035]	gi|15608954|ref|NP_216333.1|	48	59.04	0	0
27	Rv1836c	Rv1836c	hypothetical protein Rv1836c [Mycobacterium tuberculosis H37Rv] [MASS=69676]	gi|15608973|ref|NP_216352.1|	14	17.22	0	12.24
28	Rv1841c	Rv1841c	hypothetical protein Rv1841c [Mycobacterium tuberculosis H37Rv] [MASS=36685]	gi|15608978|ref|NP_216357.1|	2	2.46	0	0
29	Rv2080	LppJ	Possible lipoprotein lppJ [Mycobacterium tuberculosis H37Rv] [MASS=20324]	gi|15609217|ref|NP_216596.1|	2	2.46	0	0
30	Rv2213	PepB	leucyl aminopeptidase [Mycobacterium tuberculosis H37Rv] [MASS=53481]	gi|15609350|ref|NP_216729.1|	10	12.3	2.49	0
31	Rv2259	AdhE2	Probable zinc-dependent alcohol dehydrogenase AdhE2 [Mycobacterium tuberculosis H37Rv] [MASS=37888]	gi|15609396|ref|NP_216775.1|	9	11.07	4.15	0
32	Rv2307B	Rv2307B	HYPOTHETICAL GLYCINE RICH PROTEIN [Mycobacterium tuberculosis H37Rv] [MASS=14586]	gi|57116965|ref|YP_177666.1|	2	2.46	0	0
33	Rv2339	MmpL9	PROBABLE CONSERVED TRANSMEMBRANE TRANSPORT PROTEIN MMPL9 [Mycobacterium tuberculosis H37Rv] [MASS=104612]	gi|15609476|ref|NP_216855.1|	7	8.61	0	0
34	Rv2455c	Rv2455c	PROBABLE OXIDOREDUCTASE (ALPHA SUBUNIT) [Mycobacterium tuberculosis H37Rv] [MASS=69182]	gi|15609592|ref|NP_216971.1|	7	8.61	0	0
35	Rv2490c	PE_PGRS43	PE-PGRS FAMILY PROTEIN [Mycobacterium tuberculosis H37Rv] [MASS=133123]	gi|57116996|ref|YP_177887.1|	22	27.06	8.3	21.42
36	Rv2524c	Fas	PROBABLE FATTY ACID SYNTHASE FAS (FATTY ACID SYNTHETASE) [Mycobacterium tuberculosis H37Rv] [MASS=326252]	gi|15609661|ref|NP_217040.1|	11	13.53	10.79	0
37	Rv2559	Rv2559	recombination factor protein RarA [Mycobacterium tuberculosis H37Rv] [MASS=47499]	gi|15609696|ref|NP_217075.1|	18	22.14	0	0
38	Rv2784c	LppU	PROBABLE LIPOPROTEIN LPPU [Mycobacterium tuberculosis H37Rv] [MASS=18133]	gi|15609921|ref|NP_217300.1|	4	4.92	0	0
39	Rv2920c	Amt	PROBABLE AMMONIUM-TRANSPORT INTEGRAL MEMBRANE PROTEIN AMT [Mycobacterium tuberculosis H37Rv] [MASS=49241]	gi|15610057|ref|NP_217436.1|	4	4.92	0	0
40	Rv2922c	Smc	PROBABLE CHROMOSOME PARTITION PROTEIN SMC [Mycobacterium tuberculosis H37Rv] [MASS=130636]	gi|57117036|ref|NP_217438.2|	9	11.07	0	0
41	Rv2930	FadD26	acyl-CoA synthetase [Mycobacterium tuberculosis H37Rv] [MASS=63044]	gi|57117038|ref|NP_217446.2|	8	9.84	0	0
42	Rv2950c	FadD29	acyl-CoA synthetase [Mycobacterium tuberculosis H37Rv] [MASS=63657]	gi|161352463|ref|NP_217466.2|	8	9.84	4.15	0
43	Rv2973c	RecG	PROBABLE ATP-DEPENDENT DNA HELICASE RECG [Mycobacterium tuberculosis H37Rv] [MASS=80360]	gi|15610110|ref|NP_217489.1|	10	12.3	0	0
44	Rv3121	Cyp141	PROBABLE CYTOCHROME P450 141 CYP141 [Mycobacterium tuberculosis H37Rv] [MASS=43731]	gi|15610258|ref|NP_217637.1|	9	11.07	0	0
45	Rv3299c	AtsB	PROBABLE ARYLSULFATASE ATSB (ARYL-SULFATE SULPHOHYDROLASE) (SULFATASE) [Mycobacterium tuberculosis H37Rv] [MASS=105679]	gi|15610435|ref|NP_217816.1|	9	11.07	0	0
46	Rv3343c	PPE54	PPE FAMILY PROTEIN [Mycobacterium tuberculosis H37Rv] [MASS=250344]	gi|57117092|ref|YP_177960.1|	19	23.37	3.32	5.1
47	Rv3345c	PE_PGRS50	PE-PGRS FAMILY PROTEIN [Mycobacterium tuberculosis H37Rv] [MASS=129384]	gi|57117094|ref|YP_177962.1|	11	13.53	4.15	5.1
48	Rv3347c	PPE55	PPE FAMILY PROTEIN [Mycobacterium tuberculosis H37Rv] [MASS=309556]	gi|57117095|ref|YP_177963.1|	15	18.45	4.98	9.18
49	Rv3350c	PPE56	PPE FAMILY PROTEIN [Mycobacterium tuberculosis H37Rv] [MASS=363348]	gi|57117096|ref|YP_177964.1|	6	7.38	6.64	15.3
50	Rv3476c	KgtP	PROBABLE DICARBOXYLIC ACID TRANSPORT INTEGRAL MEMBRANE PROTEIN KGTP (DICARBOXYLATE TRANSPORTER) [Mycobacterium tuberculosis H37Rv] [MASS=49516]	gi|15610612|ref|NP_217993.1|	4	4.92	0	0
51	Rv3507	PE_PGRS53	PE-PGRS FAMILY PROTEIN [Mycobacterium tuberculosis H37Rv] [MASS=110622]	gi|57117114|ref|YP_177978.1|	15	18.45	13.28	62.22
52	Rv3508	PE_PGRS54	PE-PGRS FAMILY PROTEIN [Mycobacterium tuberculosis H37Rv] [MASS=147624]	gi|57117115|ref|YP_177979.1|	9	11.07	0	28.56
53	Rv3512	PE_PGRS56	PE-PGRS FAMILY PROTEIN [Mycobacterium tuberculosis H37Rv] [MASS=81161]	gi|57117117|ref|YP_177981.1|	27	33.21	19.09	23.46
54	Rv3514	PE_PGRS57	PE-PGRS FAMILY PROTEIN [Mycobacterium tuberculosis H37Rv] [MASS=115752]	gi|57117118|ref|YP_177982.1|	11	13.53	7.47	26.52
55	Rv3540c	Ltp2	lipid-transfer protein [Mycobacterium tuberculosis H37Rv] [MASS=40587]	gi|15610676|ref|NP_218057.1|	3	3.69	0	0
56	Rv3573c	FadE34	PROBABLE ACYL-CoA DEHYDROGENASE FADE34 [Mycobacterium tuberculosis H37Rv] [MASS=74578]	gi|15610709|ref|NP_218090.1|	2	2.46	1.66	4.08
57	Rv3616c	Rv3616c	CONSERVED HYPOTHETICAL ALANINE AND GLYCINE RICH PROTEIN [Mycobacterium tuberculosis H37Rv] [MASS=39888]	gi|15610752|ref|NP_218133.1|	13	15.99	0	0
58	Rv3702c	Rv3702c	hypothetical protein Rv3702c [Mycobacterium tuberculosis H37Rv] [MASS=24627]	gi|15610838|ref|NP_218219.1|	15	18.45	0	0
59	Rv3777	Rv3777	PROBABLE OXIDOREDUCTASE [Mycobacterium tuberculosis H37Rv] [MASS=33963]	gi|15610913|ref|NP_218294.1|	9	11.07	0	0
60	Rv3809c	Glf	UDP-GALACTOPYRANOSE MUTASE GLF (UDP-GALP MUTASE) (NAD+-FLAVIN ADENINE DINUCLEOTIDE-REQUIRING ENZYME) [Mycobacterium tuberculosis H37Rv] [MASS=45814]	gi|15610945|ref|NP_218326.1|	4	4.92	0	0
61	Rv3825c	Pks2	PROBABLE POLYKETIDE SYNTHASE PKS2 [Mycobacterium tuberculosis H37Rv] [MASS=225775]	gi|15610961|ref|NP_218342.1|	8	9.84	0	0
62	Rv3884c	Rv3884c	PROBABLE CBXX/CFQX FAMILY PROTEIN [Mycobacterium tuberculosis H37Rv] [MASS=68041]	gi|15611020|ref|NP_218401.1|	18	22.14	0	0
63	Rv3894c	Rv3894c	POSSIBLE CONSERVED MEMBRANE PROTEIN [Mycobacterium tuberculosis H37Rv] [MASS=153699]	gi|15611030|ref|NP_218411.1|	8	9.84	4.98	0
